# Supplementary material for: Do honey bee (Apis mellifera) foragers recruit their nestmates to native forbs in reconstructed prairie habitats?
Source: PLoS One. 2020 Feb 12;15(2):e0228169. doi: 10.1371/journal.pone.0228169 (PMC7015315; doi:10.1371/journal.pone.0228169)
Supplement: S1 Data — (CSV) [file pone.0228169.s001.csv]

Bee_ID	Distance_meters	Duration_seconds
28	51.01667232	0.258333333
29	51.01667232	0.233333333
2	51.01667232	0.183333333
4	51.01667232	0.4
30	51.01667232	0.4
10	51.01667232	0.191666667
12	51.01667232	0.225
23	51.01667232	0.325
30	92.95219799	0.316666667
36	92.95219799	0.458333333
38	92.95219799	0.291666667
40	92.95219799	0.45
41	92.95219799	0.316666667
14	92.95219799	0.4
15	92.95219799	0.375
47	92.95219799	0.341666667
2	247.4958941	0.475
33	247.4958941	0.458333333
3	247.4958941	0.558333333
30	247.4958941	0.641666667
12	247.4958941	0.5
13	247.4958941	0.616666667
14	247.4958941	0.608333333
15	247.4958941	0.591666667
22	247.4958941	0.466666667
23	247.4958941	0.633333333
48	247.4958941	0.441666667
1	535.1279507	0.875
37	535.1279507	0.941666667
12	535.1279507	0.825
43	535.1279507	0.783333333
17	535.1279507	0.8
18	535.1279507	0.741666667
20	535.1279507	0.808333333
27	838.4544851	1.283333333
1	838.4544851	1.325
6	838.4544851	1.491666667
9	838.4544851	1.183333333
39	838.4544851	1.2
42	838.4544851	1.466666667
16	838.4544851	1.283333333
45	838.4544851	1.05
46	838.4544851	1.308333333
48	838.4544851	1.025
24	838.4544851	1.341666667
25	838.4544851	1.425
26	838.4544851	1.333333333
1	1059.424634	1.666666667
3	1059.424634	1.675
5	1059.424634	1.55
7	1059.424634	1.775
8	1059.424634	1.466666667
11	1059.424634	1.55
19	1059.424634	1.525
21	1059.424634	1.7
24	1059.424634	1.6
32	1059.424634	1.6
34	1059.424634	1.733333333
35	1059.424634	1.366666667
31	1059.424634	1.433333333
44	1059.424634	1.208333333
46	1059.424634	1.375
47	1059.424634	1.408333333
