# Supplementary material for: Do honey bee (Apis mellifera) foragers recruit their nestmates to native forbs in reconstructed prairie habitats?
Source: PLoS One. 2020 Feb 12;15(2):e0228169. doi: 10.1371/journal.pone.0228169 (PMC7015315; doi:10.1371/journal.pone.0228169)
Supplement: S2 Data — (CSV) [file pone.0228169.s002.csv]

site	site_UTM_easting	site_UTM_northing	site_latitude	site_longitude	colony	pollen_nectar	video	year	month	day	hour	minute	mean_angle_degrees_clockwise_fr_vertical	mean_duration_seconds
Belwin	516102	4976402.67	44.940869	-92.795909	4	N	MAH00046	2015	6	29	14	5.453333333	141.75	1.783333333
Belwin	516102	4976402.67	44.940869	-92.795909	4	N	MAH00046	2015	6	29	14	5.611666667	116.25	1.583333333
Belwin	516102	4976402.67	44.940869	-92.795909	4	N	MAH00046	2015	6	29	14	7.599444444	247.5	0.975
Belwin	516102	4976402.67	44.940869	-92.795909	4	N	MAH00046	2015	6	29	14	10.81611111	124.5	2.533333333
Belwin	516102	4976402.67	44.940869	-92.795909	4	P	MAH00046	2015	6	29	14	11.19722222	100	2.183333333
Belwin	516102	4976402.67	44.940869	-92.795909	4	P	MAH00046	2015	6	29	14	16.19	130.25	1.208333333
Belwin	516102	4976402.67	44.940869	-92.795909	4	N	MAH00046	2015	6	29	14	17.99777778	89	1.675
Belwin	516102	4976402.67	44.940869	-92.795909	4	N	MAH00046	2015	6	29	14	18.88833333	130.25	1.9
Belwin	516102	4976402.67	44.940869	-92.795909	4	N	MAH00046	2015	6	29	14	21.81111111	120	2.366666667
Belwin	516102	4976402.67	44.940869	-92.795909	4	P	MAH00046	2015	6	29	14	22.40388889	286	0.858333333
Belwin	516102	4976402.67	44.940869	-92.795909	4	P	MAH00046	2015	6	29	14	23.43555556	126.75	2.35
Belwin	516102	4976402.67	44.940869	-92.795909	4	P	MAH00046	2015	6	29	14	29.57333333	127.25	1.975
Belwin	516102	4976402.67	44.940869	-92.795909	4	N	MAH00046	2015	6	29	14	31.75666667	105	1.566666667
Belwin	516102	4976402.67	44.940869	-92.795909	4	P	MAH00046	2015	6	29	14	33.11944444	111.25	2.241666667
Belwin	516102	4976402.67	44.940869	-92.795909	4	N	MAH00046	2015	6	29	14	34.75222222	112.75	1.475
Belwin	516102	4976402.67	44.940869	-92.795909	4	N	MAH00046	2015	6	29	14	39.27277778	112.75	2.375
Belwin	516102	4976402.67	44.940869	-92.795909	5	N	MAH00048	2015	6	29	15	50.67888889	352.75	0.958333333
Belwin	516102	4976402.67	44.940869	-92.795909	5	N	MAH00048	2015	6	29	15	51.90388889	307.75	4.691666667
Belwin	516102	4976402.67	44.940869	-92.795909	5	N	MAH00048	2015	6	29	16	0.532222222	55.25	1.766666667
Belwin	516102	4976402.67	44.940869	-92.795909	5	N	MAH00049	2015	6	29	15	51.04666667	107	1.958333333
Belwin	516102	4976402.67	44.940869	-92.795909	5	N	MAH00049	2015	6	29	15	52.91444444	87.75	0.875
Belwin	516102	4976402.67	44.940869	-92.795909	5	N	MAH00049	2015	6	29	15	56.24444444	100	1.125
Belwin	516102	4976402.67	44.940869	-92.795909	5	N	MAH00049	2015	6	29	15	57.59833333	159.75	0.416666667
Belwin	516102	4976402.67	44.940869	-92.795909	5	P	MAH00049	2015	6	29	15	57.63277778	97	1.758333333
Belwin	516102	4976402.67	44.940869	-92.795909	5	N	MAH00049	2015	6	29	16	8.896666667	105.75	0.708333333
Belwin	516102	4976402.67	44.940869	-92.795909	5	N	MAH00049	2015	6	29	16	9.561666667	284	4.766666667
Belwin	516102	4976402.67	44.940869	-92.795909	5	N	MAH00049	2015	6	29	16	15.58944444	83	1.375
Belwin	516102	4976402.67	44.940869	-92.795909	5	P	MAH00049	2015	6	29	16	25.075	345.5	1.45
Belwin	516102	4976402.67	44.940869	-92.795909	6	N	MAH00047	2015	6	29	14	55.21055556	62.5	1.708333333
Belwin	516102	4976402.67	44.940869	-92.795909	6	N	MAH00047	2015	6	29	14	55.355	104.5	1.883333333
Belwin	516102	4976402.67	44.940869	-92.795909	6	P	MAH00047	2015	6	29	14	56.10888889	72.5	1.508333333
Belwin	516102	4976402.67	44.940869	-92.795909	6	N	MAH00047	2015	6	29	14	57.67944444	98.75	1.908333333
Belwin	516102	4976402.67	44.940869	-92.795909	6	N	MAH00047	2015	6	29	14	58.81333333	132.5	1.075
Belwin	516102	4976402.67	44.940869	-92.795909	6	N	MAH00047	2015	6	29	15	1.177777778	92.5	2.2
Belwin	516102	4976402.67	44.940869	-92.795909	6	P	MAH00047	2015	6	29	15	4.511111111	95	2.558333333
Belwin	516102	4976402.67	44.940869	-92.795909	6	P	MAH00047	2015	6	29	15	6.077777778	89.5	2.566666667
Belwin	516102	4976402.67	44.940869	-92.795909	6	N	MAH00047	2015	6	29	15	7.788333333	104	2.158333333
Belwin	516102	4976402.67	44.940869	-92.795909	6	P	MAH00047	2015	6	29	15	9.722777778	98.25	1.658333333
Belwin	516102	4976402.67	44.940869	-92.795909	6	N	MAH00047	2015	6	29	15	11.805	47.25	1.608333333
Belwin	516102	4976402.67	44.940869	-92.795909	6	N	MAH00047	2015	6	29	15	16.56277778	86.5	1.458333333
Belwin	516102	4976402.67	44.940869	-92.795909	6	N	MAH00047	2015	6	29	15	28.90944444	99.75	1.941666667
Belwin	516102	4976402.67	44.940869	-92.795909	6	P	MAH00047	2015	6	29	15	29.76888889	95	1.85
Belwin	516102	4976402.67	44.940869	-92.795909	6	N	MAH00047	2015	6	29	15	33.02555556	25	2.025
Belwin	516102	4976402.67	44.940869	-92.795909	4	N	MAH00065	2015	7	9	11	32.10555556	215.75	1.241666667
Belwin	516102	4976402.67	44.940869	-92.795909	4	N	MAH00065	2015	7	9	11	33.49888889	232.5	2.008333333
Belwin	516102	4976402.67	44.940869	-92.795909	4	N	MAH00065	2015	7	9	11	34.72222222	128.75	1.658333333
Belwin	516102	4976402.67	44.940869	-92.795909	4	P	MAH00065	2015	7	9	11	37.69277778	167.25	1.658333333
Belwin	516102	4976402.67	44.940869	-92.795909	4	N	MAH00065	2015	7	9	11	38.635	255.75	1.058333333
Belwin	516102	4976402.67	44.940869	-92.795909	4	N	MAH00065	2015	7	9	11	42.80111111	57	0.925
Belwin	516102	4976402.67	44.940869	-92.795909	4	P	MAH00065	2015	7	9	11	42.96333333	226.75	1.233333333
Belwin	516102	4976402.67	44.940869	-92.795909	4	P	MAH00065	2015	7	9	11	44.96	154.75	1.408333333
Belwin	516102	4976402.67	44.940869	-92.795909	4	N	MAH00065	2015	7	9	11	46.28333333	100.25	1.208333333
Belwin	516102	4976402.67	44.940869	-92.795909	4	P	MAH00065	2015	7	9	11	47.06722222	231.75	1.366666667
Belwin	516102	4976402.67	44.940869	-92.795909	4	N	MAH00065	2015	7	9	11	51.22944444	189.25	2.091666667
Belwin	516102	4976402.67	44.940869	-92.795909	4	P	MAH00065	2015	7	9	11	51.75444444	267.75	2.183333333
Belwin	516102	4976402.67	44.940869	-92.795909	4	N	MAH00065	2015	7	9	11	53.60833333	87.25	1.766666667
Belwin	516102	4976402.67	44.940869	-92.795909	4	N	MAH00065	2015	7	9	11	56.62388889	95	1.141666667
Belwin	516102	4976402.67	44.940869	-92.795909	4	N	MAH00065	2015	7	9	12	1.559444444	85.75	1.208333333
Belwin	516102	4976402.67	44.940869	-92.795909	4	P	MAH00065	2015	7	9	12	6.325555556	131	1.191666667
Belwin	516102	4976402.67	44.940869	-92.795909	4	P	MAH00065	2015	7	9	12	9.802777778	36.5	2.291666667
Belwin	516102	4976402.67	44.940869	-92.795909	5	P	MAH00063	2015	7	9	10	28.26611111	108.5	1.133333333
Belwin	516102	4976402.67	44.940869	-92.795909	5	N	MAH00063	2015	7	9	10	28.92944444	15.5	0.933333333
Belwin	516102	4976402.67	44.940869	-92.795909	5	N	MAH00063	2015	7	9	10	30.36111111	221	1.75
Belwin	516102	4976402.67	44.940869	-92.795909	5	P	MAH00063	2015	7	9	10	32.07888889	206.75	1.733333333
Belwin	516102	4976402.67	44.940869	-92.795909	5	N	MAH00063	2015	7	9	10	33.11388889	198	1.191666667
Belwin	516102	4976402.67	44.940869	-92.795909	5	P	MAH00063	2015	7	9	10	35.60111111	242.25	1.883333333
Belwin	516102	4976402.67	44.940869	-92.795909	5	N	MAH00063	2015	7	9	10	38.03722222	27.75	0.6
Belwin	516102	4976402.67	44.940869	-92.795909	5	N	MAH00063	2015	7	9	10	39.32055556	121	1.083333333
Belwin	516102	4976402.67	44.940869	-92.795909	5	P	MAH00063	2015	7	9	10	39.52555556	165	1.533333333
Belwin	516102	4976402.67	44.940869	-92.795909	5	N	MAH00063	2015	7	9	10	40.26777778	344.5	0.891666667
Belwin	516102	4976402.67	44.940869	-92.795909	5	P	MAH00063	2015	7	9	10	41.24777778	32.25	0.4
Belwin	516102	4976402.67	44.940869	-92.795909	5	N	MAH00063	2015	7	9	10	42.64833333	139.5	0.333333333
Belwin	516102	4976402.67	44.940869	-92.795909	5	P	MAH00063	2015	7	9	10	42.88722222	199	1.725
Belwin	516102	4976402.67	44.940869	-92.795909	5	P	MAH00063	2015	7	9	10	46.00555556	260.75	1.833333333
Belwin	516102	4976402.67	44.940869	-92.795909	5	N	MAH00063	2015	7	9	10	46.68111111	44.75	0.775
Belwin	516102	4976402.67	44.940869	-92.795909	5	N	MAH00063	2015	7	9	10	46.92777778	90	0.8
Belwin	516102	4976402.67	44.940869	-92.795909	5	P	MAH00063	2015	7	9	10	48.88111111	234	1.766666667
Belwin	516102	4976402.67	44.940869	-92.795909	5	P	MAH00063	2015	7	9	10	51.39833333	203	1.8
Belwin	516102	4976402.67	44.940869	-92.795909	5	N	MAH00063	2015	7	9	10	58.84555556	184.5	0.966666667
Belwin	516102	4976402.67	44.940869	-92.795909	5	P	MAH00063	2015	7	9	11	1.466666667	187.5	1.75
Belwin	516102	4976402.67	44.940869	-92.795909	6	N	MAH00062	2015	7	9	9	17.67888889	52.25	0.566666667
Belwin	516102	4976402.67	44.940869	-92.795909	6	N	MAH00062	2015	7	9	9	19.38055556	121	1.141666667
Belwin	516102	4976402.67	44.940869	-92.795909	6	N	MAH00062	2015	7	9	9	20.50722222	186.5	1.841666667
Belwin	516102	4976402.67	44.940869	-92.795909	6	N	MAH00062	2015	7	9	9	24.25666667	122.75	1.4
Belwin	516102	4976402.67	44.940869	-92.795909	6	N	MAH00062	2015	7	9	9	29.33833333	68.25	1.041666667
Belwin	516102	4976402.67	44.940869	-92.795909	6	N	MAH00062	2015	7	9	9	30.62722222	117.25	1.075
Belwin	516102	4976402.67	44.940869	-92.795909	6	N	MAH00062	2015	7	9	9	39.395	45.25	0.616666667
Belwin	516102	4976402.67	44.940869	-92.795909	6	N	MAH00062	2015	7	9	9	46.00555556	174.5	0.958333333
Belwin	516102	4976402.67	44.940869	-92.795909	6	N	MAH00062	2015	7	9	9	46.16833333	86.5	1.275
Belwin	516102	4976402.67	44.940869	-92.795909	6	N	MAH00062	2015	7	9	9	54.33833333	155	1.208333333
Belwin	516102	4976402.67	44.940869	-92.795909	6	P	MAH00062	2015	7	9	10	9.733333333	159.25	0.733333333
Belwin	516102	4976402.67	44.940869	-92.795909	6	P	MAH00062	2015	7	9	10	10.64166667	71	0.333333333
Belwin	516102	4976402.67	44.940869	-92.795909	6	P	MAH00066	2015	7	9	12	33.53611111	152.25	1.716666667
Belwin	516102	4976402.67	44.940869	-92.795909	4	N	MAH00076	2015	7	15	14	51.76944444	95.75	1.683333333
Belwin	516102	4976402.67	44.940869	-92.795909	4	P	MAH00076	2015	7	15	14	56.67666667	194.25	1.358333333
Belwin	516102	4976402.67	44.940869	-92.795909	4	P	MAH00076	2015	7	15	15	3.085	144	1.741666667
Belwin	516102	4976402.67	44.940869	-92.795909	4	N	MAH00076	2015	7	15	15	6.483888889	305.25	5.616666667
Belwin	516102	4976402.67	44.940869	-92.795909	4	N	MAH00076	2015	7	15	15	8.600555556	112.25	1.916666667
Belwin	516102	4976402.67	44.940869	-92.795909	4	P	MAH00076	2015	7	15	15	9.318888889	75.75	1.525
Belwin	516102	4976402.67	44.940869	-92.795909	4	N	MAH00076	2015	7	15	15	12.57555556	123	1.416666667
Belwin	516102	4976402.67	44.940869	-92.795909	4	P	MAH00076	2015	7	15	15	15.57277778	99.5	1.475
Belwin	516102	4976402.67	44.940869	-92.795909	4	N	MAH00076	2015	7	15	15	18.00333333	50.5	1.675
Belwin	516102	4976402.67	44.940869	-92.795909	4	N	MAH00076	2015	7	15	15	19.11166667	140.5	1.341666667
Belwin	516102	4976402.67	44.940869	-92.795909	4	N	MAH00076	2015	7	15	15	20.22166667	130.5	1.858333333
Belwin	516102	4976402.67	44.940869	-92.795909	4	P	MAH00076	2015	7	15	15	21.99833333	28.75	1.991666667
Belwin	516102	4976402.67	44.940869	-92.795909	4	N	MAH00076	2015	7	15	15	27.07611111	101.5	1.775
Belwin	516102	4976402.67	44.940869	-92.795909	4	N	MAH00076	2015	7	15	15	32.765	98	1.733333333
Belwin	516102	4976402.67	44.940869	-92.795909	4	N	MAH00076	2015	7	15	15	33.63611111	110.5	1.616666667
Belwin	516102	4976402.67	44.940869	-92.795909	4	P	MAH00076	2015	7	15	15	35.72555556	25	1.658333333
Belwin	516102	4976402.67	44.940869	-92.795909	4	P	MAH00076	2015	7	15	15	40.08555556	121.25	1.616666667
Belwin	516102	4976402.67	44.940869	-92.795909	5	P	MAH00074	2015	7	15	12	42.525	66.75	0.7
Belwin	516102	4976402.67	44.940869	-92.795909	5	P	MAH00074	2015	7	15	12	44.335	114.75	2.891666667
Belwin	516102	4976402.67	44.940869	-92.795909	5	N	MAH00074	2015	7	15	12	44.43333333	203.75	2.15
Belwin	516102	4976402.67	44.940869	-92.795909	5	N	MAH00074	2015	7	15	12	45.54222222	159.25	2
Belwin	516102	4976402.67	44.940869	-92.795909	5	N	MAH00074	2015	7	15	12	47.50444444	220.5	2.05
Belwin	516102	4976402.67	44.940869	-92.795909	5	P	MAH00074	2015	7	15	12	48.87	139	2.225
Belwin	516102	4976402.67	44.940869	-92.795909	5	N	MAH00074	2015	7	15	12	51.17055556	172.75	1.733333333
Belwin	516102	4976402.67	44.940869	-92.795909	5	P	MAH00074	2015	7	15	12	55.28055556	234.5	0.633333333
Belwin	516102	4976402.67	44.940869	-92.795909	5	N	MAH00074	2015	7	15	13	5.187222222	129.75	1.441666667
Belwin	516102	4976402.67	44.940869	-92.795909	5	P	MAH00074	2015	7	15	13	10.83388889	182.5	0.925
Belwin	516102	4976402.67	44.940869	-92.795909	5	P	MAH00074	2015	7	15	13	15.19166667	154.75	1.691666667
Belwin	516102	4976402.67	44.940869	-92.795909	5	N	MAH00074	2015	7	15	13	17.075	186	1.25
Belwin	516102	4976402.67	44.940869	-92.795909	5	N	MAH00074	2015	7	15	13	21.88111111	285.5	0.433333333
Belwin	516102	4976402.67	44.940869	-92.795909	5	N	MAH00074	2015	7	15	13	23.36388889	152.5	0.891666667
Belwin	516102	4976402.67	44.940869	-92.795909	5	P	MAH00074	2015	7	15	13	24.99555556	12.25	3.775
Belwin	516102	4976402.67	44.940869	-92.795909	5	N	MAH00074	2015	7	15	13	29.27277778	122.25	1.05
Belwin	516102	4976402.67	44.940869	-92.795909	5	P	MAH00074	2015	7	15	13	33.85111111	95	1.233333333
Belwin	516102	4976402.67	44.940869	-92.795909	6	N	MAH00075	2015	7	15	13	50.46166667	139	1.891666667
Belwin	516102	4976402.67	44.940869	-92.795909	6	P	MAH00075	2015	7	15	13	50.56833333	81.5	1.625
Belwin	516102	4976402.67	44.940869	-92.795909	6	N	MAH00075	2015	7	15	13	53.995	339.25	1.191666667
Belwin	516102	4976402.67	44.940869	-92.795909	6	N	MAH00075	2015	7	15	13	54.10888889	170	1.125
Belwin	516102	4976402.67	44.940869	-92.795909	6	P	MAH00075	2015	7	15	13	59.50166667	94.25	1.675
Belwin	516102	4976402.67	44.940869	-92.795909	6	N	MAH00075	2015	7	15	14	0.06	321.25	1.475
Belwin	516102	4976402.67	44.940869	-92.795909	6	N	MAH00075	2015	7	15	14	2.505	346.75	2.141666667
Belwin	516102	4976402.67	44.940869	-92.795909	6	N	MAH00075	2015	7	15	14	9.44	287.5	1.508333333
Belwin	516102	4976402.67	44.940869	-92.795909	6	N	MAH00075	2015	7	15	14	10.31277778	70	0.525
Belwin	516102	4976402.67	44.940869	-92.795909	6	N	MAH00075	2015	7	15	14	12.13722222	329.5	1.541666667
Belwin	516102	4976402.67	44.940869	-92.795909	6	P	MAH00075	2015	7	15	14	13.56222222	151	1.141666667
Belwin	516102	4976402.67	44.940869	-92.795909	6	N	MAH00075	2015	7	15	14	20.16166667	327	1.583333333
Belwin	516102	4976402.67	44.940869	-92.795909	6	N	MAH00075	2015	7	15	14	31.36833333	334.5	1.583333333
Belwin	516102	4976402.67	44.940869	-92.795909	6	P	MAH00075	2015	7	15	14	33.86611111	57.5	1.766666667
Belwin	516102	4976402.67	44.940869	-92.795909	6	P	MAH00075	2015	7	15	14	35.76	184.75	0.525
Belwin	516102	4976402.67	44.940869	-92.795909	4	N	MAH00079	2015	7	20	10	52.46944444	184.5	2.058333333
Belwin	516102	4976402.67	44.940869	-92.795909	4	P	MAH00079	2015	7	20	10	55.55944444	167	2.141666667
Belwin	516102	4976402.67	44.940869	-92.795909	4	N	MAH00079	2015	7	20	11	0.028888889	229.25	2.45
Belwin	516102	4976402.67	44.940869	-92.795909	4	N	MAH00079	2015	7	20	11	0.222222222	193.5	1.641666667
Belwin	516102	4976402.67	44.940869	-92.795909	4	N	MAH00079	2015	7	20	11	0.783888889	38.5	1.85
Belwin	516102	4976402.67	44.940869	-92.795909	4	P	MAH00079	2015	7	20	11	2.872777778	197	1.7
Belwin	516102	4976402.67	44.940869	-92.795909	4	N	MAH00079	2015	7	20	11	5.53	200.75	0.625
Belwin	516102	4976402.67	44.940869	-92.795909	4	N	MAH00079	2015	7	20	11	6.411111111	215.5	1.8
Belwin	516102	4976402.67	44.940869	-92.795909	4	N	MAH00079	2015	7	20	11	7.117222222	127	1.966666667
Belwin	516102	4976402.67	44.940869	-92.795909	4	N	MAH00079	2015	7	20	11	8.568333333	352.25	0.65
Belwin	516102	4976402.67	44.940869	-92.795909	4	N	MAH00079	2015	7	20	11	10.72277778	212.75	1.866666667
Belwin	516102	4976402.67	44.940869	-92.795909	4	N	MAH00079	2015	7	20	11	21.31944444	173.5	1.908333333
Belwin	516102	4976402.67	44.940869	-92.795909	5	P	MAH00077	2015	7	20	9	32.15	213.5	1.575
Belwin	516102	4976402.67	44.940869	-92.795909	5	N	MAH00077	2015	7	20	9	33.66333333	135.75	1.591666667
Belwin	516102	4976402.67	44.940869	-92.795909	5	P	MAH00077	2015	7	20	9	37.05444444	212.75	1.75
Belwin	516102	4976402.67	44.940869	-92.795909	5	N	MAH00077	2015	7	20	9	40.00944444	190.75	1.4
Belwin	516102	4976402.67	44.940869	-92.795909	5	N	MAH00077	2015	7	20	9	44.29555556	213.5	1.825
Belwin	516102	4976402.67	44.940869	-92.795909	5	N	MAH00077	2015	7	20	9	45.03833333	206	1.633333333
Belwin	516102	4976402.67	44.940869	-92.795909	5	N	MAH00077	2015	7	20	9	47.65833333	220.25	1.675
Belwin	516102	4976402.67	44.940869	-92.795909	5	N	MAH00077	2015	7	20	9	47.85611111	178	1.466666667
Belwin	516102	4976402.67	44.940869	-92.795909	5	N	MAH00077	2015	7	20	9	48.625	21.75	0.591666667
Belwin	516102	4976402.67	44.940869	-92.795909	5	N	MAH00077	2015	7	20	9	54.76333333	201.75	2.25
Belwin	516102	4976402.67	44.940869	-92.795909	5	N	MAH00077	2015	7	20	10	7.389444444	182.25	1.741666667
Belwin	516102	4976402.67	44.940869	-92.795909	5	P	MAH00077	2015	7	20	10	9.111111111	44.25	1.175
Belwin	516102	4976402.67	44.940869	-92.795909	5	P	MAH00077	2015	7	20	10	12.31888889	172.5	1.8
Belwin	516102	4976402.67	44.940869	-92.795909	5	N	MAH00077	2015	7	20	10	16.075	209.75	1.175
Belwin	516102	4976402.67	44.940869	-92.795909	6	N	MAH00080	2015	7	20	11	52.82666667	115	1.541666667
Belwin	516102	4976402.67	44.940869	-92.795909	6	N	MAH00080	2015	7	20	11	53.36722222	202.5	1.825
Belwin	516102	4976402.67	44.940869	-92.795909	6	P	MAH00080	2015	7	20	11	53.46833333	123	0.983333333
Belwin	516102	4976402.67	44.940869	-92.795909	6	P	MAH00080	2015	7	20	11	56.58888889	146	0.983333333
Belwin	516102	4976402.67	44.940869	-92.795909	6	N	MAH00080	2015	7	20	12	1.390555556	161	1.883333333
Belwin	516102	4976402.67	44.940869	-92.795909	6	N	MAH00080	2015	7	20	12	2.778888889	179	1.966666667
Belwin	516102	4976402.67	44.940869	-92.795909	6	N	MAH00080	2015	7	20	12	4.771666667	216	2.1
Belwin	516102	4976402.67	44.940869	-92.795909	6	P	MAH00080	2015	7	20	12	5.881111111	213	1.258333333
Belwin	516102	4976402.67	44.940869	-92.795909	6	N	MAH00080	2015	7	20	12	11.55888889	166.5	1.791666667
Belwin	516102	4976402.67	44.940869	-92.795909	6	P	MAH00080	2015	7	20	12	12.78111111	96.25	1.333333333
Belwin	516102	4976402.67	44.940869	-92.795909	6	N	MAH00080	2015	7	20	12	26.58444444	5.5	0.975
Belwin	516102	4976402.67	44.940869	-92.795909	6	N	MAH00080	2015	7	20	12	28.36277778	23.25	1.025
Belwin	516102	4976402.67	44.940869	-92.795909	6	N	MAH00080	2015	7	20	12	32.46555556	95.25	1.6
Belwin	516102	4976402.67	44.940869	-92.795909	6	P	MAH00080	2015	7	20	12	33.75111111	109.5	1.2
Belwin	516102	4976402.67	44.940869	-92.795909	6	P	MAH00080	2015	7	20	12	37.50277778	87.25	1.233333333
Belwin	516102	4976402.67	44.940869	-92.795909	6	N	MAH00080	2015	7	20	12	43.32333333	149.25	1.375
Belwin	516102	4976402.67	44.940869	-92.795909	4	N	MAH00099	2015	7	31	14	19.24666667	108.25	2.2
Belwin	516102	4976402.67	44.940869	-92.795909	4	P	MAH00099	2015	7	31	14	20.29277778	111.75	1.6
Belwin	516102	4976402.67	44.940869	-92.795909	4	N	MAH00099	2015	7	31	14	21.64833333	266.5	1.508333333
Belwin	516102	4976402.67	44.940869	-92.795909	4	P	MAH00099	2015	7	31	14	22.33055556	276.75	1.116666667
Belwin	516102	4976402.67	44.940869	-92.795909	4	N	MAH00099	2015	7	31	14	26.42166667	186.5	1.133333333
Belwin	516102	4976402.67	44.940869	-92.795909	4	P	MAH00099	2015	7	31	14	29.03277778	362	0.983333333
Belwin	516102	4976402.67	44.940869	-92.795909	4	N	MAH00099	2015	7	31	14	29.69277778	91	2.191666667
Belwin	516102	4976402.67	44.940869	-92.795909	4	N	MAH00099	2015	7	31	14	31.97444444	273.75	1.125
Belwin	516102	4976402.67	44.940869	-92.795909	4	N	MAH00099	2015	7	31	14	34.225	99.25	1.85
Belwin	516102	4976402.67	44.940869	-92.795909	4	N	MAH00099	2015	7	31	14	36.69166667	220.75	0.65
Belwin	516102	4976402.67	44.940869	-92.795909	4	P	MAH00099	2015	7	31	14	46.11944444	71.5	0.883333333
Belwin	516102	4976402.67	44.940869	-92.795909	4	N	MAH00099	2015	7	31	14	47.76388889	258.75	0.941666667
Belwin	516102	4976402.67	44.940869	-92.795909	4	N	MAH00099	2015	7	31	14	48.16333333	83	1.775
Belwin	516102	4976402.67	44.940869	-92.795909	4	N	MAH00099	2015	7	31	14	50.75888889	339.5	0.791666667
Belwin	516102	4976402.67	44.940869	-92.795909	4	P	MAH00099	2015	7	31	14	58.475	154.5	1.25
Belwin	516102	4976402.67	44.940869	-92.795909	4	P	MAH00099	2015	7	31	15	2.458333333	71.5	2.275
Belwin	516102	4976402.67	44.940869	-92.795909	5	N	MAH00100	2015	7	31	15	17.79222222	185	0.516666667
Belwin	516102	4976402.67	44.940869	-92.795909	5	P	MAH00100	2015	7	31	15	20.90333333	52	1.758333333
Belwin	516102	4976402.67	44.940869	-92.795909	5	N	MAH00100	2015	7	31	15	21.73555556	77.5	1.233333333
Belwin	516102	4976402.67	44.940869	-92.795909	5	N	MAH00100	2015	7	31	15	23.84333333	181	0.8
Belwin	516102	4976402.67	44.940869	-92.795909	5	N	MAH00100	2015	7	31	15	27.22944444	40.25	0.95
Belwin	516102	4976402.67	44.940869	-92.795909	5	N	MAH00100	2015	7	31	15	29.62444444	134.75	0.375
Belwin	516102	4976402.67	44.940869	-92.795909	5	N	MAH00100	2015	7	31	15	33.20777778	77.25	1.508333333
Belwin	516102	4976402.67	44.940869	-92.795909	5	P	MAH00100	2015	7	31	15	35.00833333	45.25	1.316666667
Belwin	516102	4976402.67	44.940869	-92.795909	5	N	MAH00100	2015	7	31	15	37.44	28.5	0.666666667
Belwin	516102	4976402.67	44.940869	-92.795909	5	N	MAH00100	2015	7	31	15	41.95	60	1.433333333
Belwin	516102	4976402.67	44.940869	-92.795909	5	P	MAH00100	2015	7	31	15	43.87111111	380	0.741666667
Belwin	516102	4976402.67	44.940869	-92.795909	5	N	MAH00100	2015	7	31	15	44.64777778	247	0.75
Belwin	516102	4976402.67	44.940869	-92.795909	5	N	MAH00100	2015	7	31	15	47.99277778	78.5	1.725
Belwin	516102	4976402.67	44.940869	-92.795909	5	P	MAH00100	2015	7	31	15	55.75666667	54	1.208333333
Belwin	516102	4976402.67	44.940869	-92.795909	6	N	MAH00098	2015	7	31	13	21.40222222	74.5	1.383333333
Belwin	516102	4976402.67	44.940869	-92.795909	6	N	MAH00098	2015	7	31	13	21.71055556	202.25	1.125
Belwin	516102	4976402.67	44.940869	-92.795909	6	N	MAH00098	2015	7	31	13	22.47666667	115.75	1.533333333
Belwin	516102	4976402.67	44.940869	-92.795909	6	N	MAH00098	2015	7	31	13	26.35666667	88.75	2.175
Belwin	516102	4976402.67	44.940869	-92.795909	6	N	MAH00098	2015	7	31	13	28.94444444	149.5	0.8
Belwin	516102	4976402.67	44.940869	-92.795909	6	P	MAH00098	2015	7	31	13	31.08166667	115.75	1.208333333
Belwin	516102	4976402.67	44.940869	-92.795909	6	P	MAH00098	2015	7	31	13	34.07888889	273.5	0.683333333
Belwin	516102	4976402.67	44.940869	-92.795909	6	N	MAH00098	2015	7	31	13	34.85277778	106.5	1.925
Belwin	516102	4976402.67	44.940869	-92.795909	6	N	MAH00098	2015	7	31	13	36.25944444	204.5	0.608333333
Belwin	516102	4976402.67	44.940869	-92.795909	6	P	MAH00098	2015	7	31	13	39.02055556	116.75	0.875
Belwin	516102	4976402.67	44.940869	-92.795909	6	N	MAH00098	2015	7	31	13	40.13833333	119.25	1.883333333
Belwin	516102	4976402.67	44.940869	-92.795909	6	P	MAH00098	2015	7	31	13	46.05833333	114.25	1.383333333
Belwin	516102	4976402.67	44.940869	-92.795909	6	N	MAH00098	2015	7	31	13	49.94111111	133.25	0.933333333
Belwin	516102	4976402.67	44.940869	-92.795909	6	P	MAH00098	2015	7	31	13	50.165	158.75	1.733333333
Belwin	516102	4976402.67	44.940869	-92.795909	6	P	MAH00098	2015	7	31	13	51.27111111	93.75	2.216666667
Belwin	516102	4976402.67	44.940869	-92.795909	6	N	MAH00098	2015	7	31	13	52.91777778	26.5	1.475
Belwin	516102	4976402.67	44.940869	-92.795909	6	P	MAH00098	2015	7	31	13	54.13277778	137	0.908333333
Belwin	516102	4976402.67	44.940869	-92.795909	5	P	MAH00107	2015	8	6	9	59.12277778	200.5	1.483333333
Belwin	516102	4976402.67	44.940869	-92.795909	6	P	MAH00109	2015	8	6	11	48.89	239.75	0.6
Belwin	516102	4976402.67	44.940869	-92.795909	4	N	MAH00113	2015	8	7	11	26.95222222	163	1.475
Belwin	516102	4976402.67	44.940869	-92.795909	4	N	MAH00113	2015	8	7	11	29.08777778	0.5	0.5
Belwin	516102	4976402.67	44.940869	-92.795909	4	N	MAH00113	2015	8	7	11	30.98388889	13.5	0.625
Belwin	516102	4976402.67	44.940869	-92.795909	4	N	MAH00113	2015	8	7	11	31.32666667	277.5	0.958333333
Belwin	516102	4976402.67	44.940869	-92.795909	4	P	MAH00113	2015	8	7	11	33.50111111	109.75	0.65
Belwin	516102	4976402.67	44.940869	-92.795909	4	P	MAH00113	2015	8	7	11	34.97722222	273.5	0.658333333
Belwin	516102	4976402.67	44.940869	-92.795909	4	N	MAH00113	2015	8	7	11	35.56666667	343.25	1.033333333
Belwin	516102	4976402.67	44.940869	-92.795909	4	P	MAH00113	2015	8	7	11	36.55055556	56.75	0.616666667
Belwin	516102	4976402.67	44.940869	-92.795909	4	P	MAH00113	2015	8	7	11	42.74611111	118.75	0.641666667
Belwin	516102	4976402.67	44.940869	-92.795909	4	N	MAH00113	2015	8	7	11	48.225	227	0.466666667
Belwin	516102	4976402.67	44.940869	-92.795909	4	N	MAH00113	2015	8	7	11	49.47444444	358.75	1.05
Belwin	516102	4976402.67	44.940869	-92.795909	4	P	MAH00113	2015	8	7	11	57.70277778	214.25	1.216666667
Belwin	516102	4976402.67	44.940869	-92.795909	4	N	MAH00113	2015	8	7	11	59.37388889	149.75	1.875
Belwin	516102	4976402.67	44.940869	-92.795909	4	N	MAH00113	2015	8	7	12	3.829444444	65	0.75
Belwin	516102	4976402.67	44.940869	-92.795909	4	P	MAH00113	2015	8	7	12	4.039444444	167.25	1.525
Belwin	516102	4976402.67	44.940869	-92.795909	4	P	MAH00113	2015	8	7	12	5.402222222	175	1.6
Belwin	516102	4976402.67	44.940869	-92.795909	4	P	MAH00113	2015	8	7	12	11.01944444	58.25	1.041666667
Belwin	516102	4976402.67	44.940869	-92.795909	5	N	MAH00112	2015	8	7	10	33.07888889	173	1.275
Belwin	516102	4976402.67	44.940869	-92.795909	5	P	MAH00112	2015	8	7	10	38.94166667	199.25	1.041666667
Belwin	516102	4976402.67	44.940869	-92.795909	5	N	MAH00112	2015	8	7	10	41.855	204.25	1.05
Belwin	516102	4976402.67	44.940869	-92.795909	5	P	MAH00112	2015	8	7	10	43.89055556	19.75	0.666666667
Belwin	516102	4976402.67	44.940869	-92.795909	5	N	MAH00112	2015	8	7	10	44.05055556	191.5	0.875
Belwin	516102	4976402.67	44.940869	-92.795909	5	P	MAH00112	2015	8	7	10	47.35388889	203.5	0.691666667
Belwin	516102	4976402.67	44.940869	-92.795909	5	N	MAH00112	2015	8	7	10	50.01555556	257.25	1.158333333
Belwin	516102	4976402.67	44.940869	-92.795909	5	N	MAH00112	2015	8	7	10	55.64111111	206.25	1.333333333
Belwin	516102	4976402.67	44.940869	-92.795909	5	P	MAH00112	2015	8	7	11	7.983333333	305.5	0.308333333
Belwin	516102	4976402.67	44.940869	-92.795909	5	N	MAH00112	2015	8	7	11	15.41944444	132.5	1.466666667
Belwin	516102	4976402.67	44.940869	-92.795909	6	P	MAH00111	2015	8	7	9	36.32888889	169	2.075
Belwin	516102	4976402.67	44.940869	-92.795909	6	N	MAH00111	2015	8	7	9	39.47166667	221	0.716666667
Belwin	516102	4976402.67	44.940869	-92.795909	6	P	MAH00111	2015	8	7	9	45.00722222	163.5	3.233333333
Belwin	516102	4976402.67	44.940869	-92.795909	6	N	MAH00111	2015	8	7	9	46.66833333	171	1.916666667
Belwin	516102	4976402.67	44.940869	-92.795909	6	N	MAH00111	2015	8	7	9	46.67055556	173	1.825
Belwin	516102	4976402.67	44.940869	-92.795909	6	N	MAH00111	2015	8	7	9	51.61388889	266.25	0.391666667
Belwin	516102	4976402.67	44.940869	-92.795909	6	N	MAH00111	2015	8	7	9	55.38888889	212.5	1.425
Belwin	516102	4976402.67	44.940869	-92.795909	6	P	MAH00111	2015	8	7	9	59.00444444	97.5	1.191666667
Belwin	516102	4976402.67	44.940869	-92.795909	6	N	MAH00111	2015	8	7	10	1.374444444	101.25	0.941666667
Belwin	516102	4976402.67	44.940869	-92.795909	6	P	MAH00111	2015	8	7	10	2.636111111	210	1.775
Belwin	516102	4976402.67	44.940869	-92.795909	6	N	MAH00111	2015	8	7	10	4.585555556	130	2.666666667
Belwin	516102	4976402.67	44.940869	-92.795909	6	P	MAH00111	2015	8	7	10	5.468333333	155.5	1.958333333
Belwin	516102	4976402.67	44.940869	-92.795909	6	N	MAH00111	2015	8	7	10	17.58388889	60.5	0.483333333
Belwin	516102	4976402.67	44.940869	-92.795909	6	N	MAH00111	2015	8	7	10	21.09388889	80	0.616666667
Belwin	516102	4976402.67	44.940869	-92.795909	4	N	MAH00131	2015	8	14	14	33.30055556	210.25	0.783333333
Belwin	516102	4976402.67	44.940869	-92.795909	4	P	MAH00131	2015	8	14	14	38.11833333	94.75	1.875
Belwin	516102	4976402.67	44.940869	-92.795909	4	N	MAH00131	2015	8	14	14	39.86611111	211	0.866666667
Belwin	516102	4976402.67	44.940869	-92.795909	4	N	MAH00131	2015	8	14	14	41.03388889	160.75	0.75
Belwin	516102	4976402.67	44.940869	-92.795909	4	P	MAH00131	2015	8	14	14	43.20277778	98.25	1.466666667
Belwin	516102	4976402.67	44.940869	-92.795909	4	N	MAH00131	2015	8	14	14	44.81666667	172.25	1.083333333
Belwin	516102	4976402.67	44.940869	-92.795909	4	N	MAH00131	2015	8	14	14	46.38611111	167.75	0.908333333
Belwin	516102	4976402.67	44.940869	-92.795909	4	N	MAH00131	2015	8	14	14	52.65666667	97.25	1.658333333
Belwin	516102	4976402.67	44.940869	-92.795909	4	N	MAH00131	2015	8	14	14	58.74055556	84	1.741666667
Belwin	516102	4976402.67	44.940869	-92.795909	4	P	MAH00131	2015	8	14	14	59.16833333	154.25	0.45
Belwin	516102	4976402.67	44.940869	-92.795909	4	P	MAH00131	2015	8	14	15	1.755	314.25	0.841666667
Belwin	516102	4976402.67	44.940869	-92.795909	4	N	MAH00131	2015	8	14	15	3.333333333	164.5	0.908333333
Belwin	516102	4976402.67	44.940869	-92.795909	4	N	MAH00131	2015	8	14	15	6.721111111	194.25	0.766666667
Belwin	516102	4976402.67	44.940869	-92.795909	4	N	MAH00131	2015	8	14	15	14.15	167.5	0.691666667
Belwin	516102	4976402.67	44.940869	-92.795909	4	P	MAH00131	2015	8	14	15	16.07166667	203.25	1.016666667
Belwin	516102	4976402.67	44.940869	-92.795909	5	P	MAH00129	2015	8	14	12	40.13277778	83.75	1.616666667
Belwin	516102	4976402.67	44.940869	-92.795909	5	P	MAH00129	2015	8	14	12	42.085	144	1.425
Belwin	516102	4976402.67	44.940869	-92.795909	5	N	MAH00129	2015	8	14	12	43.26333333	47.25	3.8
Belwin	516102	4976402.67	44.940869	-92.795909	5	N	MAH00129	2015	8	14	12	43.94611111	224.75	0.891666667
Belwin	516102	4976402.67	44.940869	-92.795909	5	N	MAH00129	2015	8	14	12	45.04944444	315.25	0.783333333
Belwin	516102	4976402.67	44.940869	-92.795909	5	N	MAH00129	2015	8	14	12	46.53888889	212.5	1.008333333
Belwin	516102	4976402.67	44.940869	-92.795909	5	P	MAH00129	2015	8	14	12	48.79	93.25	1.758333333
Belwin	516102	4976402.67	44.940869	-92.795909	5	N	MAH00129	2015	8	14	12	49.32444444	140.75	0.758333333
Belwin	516102	4976402.67	44.940869	-92.795909	5	N	MAH00129	2015	8	14	12	50.65	332	0.45
Belwin	516102	4976402.67	44.940869	-92.795909	5	N	MAH00129	2015	8	14	12	54.96555556	260.75	0.791666667
Belwin	516102	4976402.67	44.940869	-92.795909	5	P	MAH00129	2015	8	14	12	58.64722222	154.75	1.008333333
Belwin	516102	4976402.67	44.940869	-92.795909	5	N	MAH00129	2015	8	14	13	6.756111111	139.25	0.9
Belwin	516102	4976402.67	44.940869	-92.795909	5	P	MAH00129	2015	8	14	13	13.79	184.75	0.775
Belwin	516102	4976402.67	44.940869	-92.795909	5	N	MAH00129	2015	8	14	13	17.15666667	119.75	0.7
Belwin	516102	4976402.67	44.940869	-92.795909	5	N	MAH00129	2015	8	14	13	18.11666667	312.25	0.483333333
Belwin	516102	4976402.67	44.940869	-92.795909	5	P	MAH00129	2015	8	14	13	27.56	330.75	0.458333333
Belwin	516102	4976402.67	44.940869	-92.795909	6	N	MAH00130	2015	8	14	13	35.97555556	302.25	0.775
Belwin	516102	4976402.67	44.940869	-92.795909	6	N	MAH00130	2015	8	14	13	39.72722222	121.25	2
Belwin	516102	4976402.67	44.940869	-92.795909	6	N	MAH00130	2015	8	14	13	44.58444444	222	0.8
Belwin	516102	4976402.67	44.940869	-92.795909	6	N	MAH00130	2015	8	14	13	45.51444444	201.75	0.641666667
Belwin	516102	4976402.67	44.940869	-92.795909	6	P	MAH00130	2015	8	14	13	51.77166667	76.5	1.1
Belwin	516102	4976402.67	44.940869	-92.795909	6	N	MAH00130	2015	8	14	13	52.33555556	131.25	1.383333333
Belwin	516102	4976402.67	44.940869	-92.795909	6	N	MAH00130	2015	8	14	13	54.45666667	228	0.2
Belwin	516102	4976402.67	44.940869	-92.795909	6	N	MAH00130	2015	8	14	13	57.57833333	26.75	0.933333333
Belwin	516102	4976402.67	44.940869	-92.795909	6	P	MAH00130	2015	8	14	13	58.57611111	110.25	1.716666667
Belwin	516102	4976402.67	44.940869	-92.795909	6	N	MAH00130	2015	8	14	14	1.638888889	81.5	1.791666667
Belwin	516102	4976402.67	44.940869	-92.795909	6	N	MAH00130	2015	8	14	14	2.442777778	199.5	0.591666667
Belwin	516102	4976402.67	44.940869	-92.795909	6	P	MAH00130	2015	8	14	14	3.476111111	195.75	0.625
Belwin	516102	4976402.67	44.940869	-92.795909	4	N	MAH00137	2015	8	20	11	43.18777778	276	0.691666667
Belwin	516102	4976402.67	44.940869	-92.795909	4	N	MAH00137	2015	8	20	11	55.57833333	277.75	0.591666667
Belwin	516102	4976402.67	44.940869	-92.795909	4	P	MAH00137	2015	8	20	11	55.80111111	213.75	0.9
Belwin	516102	4976402.67	44.940869	-92.795909	4	N	MAH00137	2015	8	20	12	7.154444444	246.25	0.858333333
Belwin	516102	4976402.67	44.940869	-92.795909	5	N	MAH00136	2015	8	20	10	34.94944444	47.5	0.666666667
Belwin	516102	4976402.67	44.940869	-92.795909	5	P	MAH00136	2015	8	20	10	41.04222222	166.25	1.808333333
Belwin	516102	4976402.67	44.940869	-92.795909	5	N	MAH00136	2015	8	20	10	46.35	170.25	1.091666667
Belwin	516102	4976402.67	44.940869	-92.795909	5	P	MAH00136	2015	8	20	10	47.13388889	26	1.1
Belwin	516102	4976402.67	44.940869	-92.795909	5	N	MAH00136	2015	8	20	10	50.49722222	192	0.766666667
Belwin	516102	4976402.67	44.940869	-92.795909	5	P	MAH00136	2015	8	20	10	53.07388889	193	0.991666667
Belwin	516102	4976402.67	44.940869	-92.795909	5	P	MAH00136	2015	8	20	10	59.99388889	194.25	1.558333333
Belwin	516102	4976402.67	44.940869	-92.795909	5	P	MAH00136	2015	8	20	11	2.744444444	292.5	1.566666667
Belwin	516102	4976402.67	44.940869	-92.795909	5	P	MAH00136	2015	8	20	11	12.84166667	346	0.633333333
Belwin	516102	4976402.67	44.940869	-92.795909	6	N	MAH00135	2015	8	20	10	16.93555556	49	1.266666667
Belwin	516102	4976402.67	44.940869	-92.795909	4	N	MAH00141	2015	8	24	13	20.70222222	192.75	0.941666667
Belwin	516102	4976402.67	44.940869	-92.795909	4	P	MAH00141	2015	8	24	13	26.07111111	173.75	0.991666667
Belwin	516102	4976402.67	44.940869	-92.795909	4	P	MAH00141	2015	8	24	13	28.31	289.25	1.108333333
Belwin	516102	4976402.67	44.940869	-92.795909	4	N	MAH00141	2015	8	24	13	28.84222222	236.75	0.608333333
Belwin	516102	4976402.67	44.940869	-92.795909	4	N	MAH00141	2015	8	24	13	38.31722222	316.25	1.016666667
Belwin	516102	4976402.67	44.940869	-92.795909	4	N	MAH00141	2015	8	24	13	40.36055556	155.5	0.766666667
Belwin	516102	4976402.67	44.940869	-92.795909	4	N	MAH00141	2015	8	24	13	45.86222222	78	1.925
Belwin	516102	4976402.67	44.940869	-92.795909	4	N	MAH00141	2015	8	24	13	46.36611111	281.75	1.091666667
Belwin	516102	4976402.67	44.940869	-92.795909	4	N	MAH00141	2015	8	24	13	50.82333333	69.75	2.766666667
Belwin	516102	4976402.67	44.940869	-92.795909	4	N	MAH00141	2015	8	24	13	53.28166667	288.25	0.775
Belwin	516102	4976402.67	44.940869	-92.795909	4	N	MAH00141	2015	8	24	13	54.21888889	119	2.4
Belwin	516102	4976402.67	44.940869	-92.795909	4	P	MAH00141	2015	8	24	13	59.74	170.5	0.766666667
Belwin	516102	4976402.67	44.940869	-92.795909	4	P	MAH00141	2015	8	24	14	2.307222222	261.25	0.983333333
Belwin	516102	4976402.67	44.940869	-92.795909	5	N	MAH00150	2015	8	26	13	36.10388889	63	1.491666667
Belwin	516102	4976402.67	44.940869	-92.795909	5	N	MAH00150	2015	8	26	13	38.08666667	196	0.675
Belwin	516102	4976402.67	44.940869	-92.795909	5	P	MAH00150	2015	8	26	13	38.67444444	188.25	0.65
Belwin	516102	4976402.67	44.940869	-92.795909	5	N	MAH00150	2015	8	26	13	40.70944444	185.5	0.791666667
Belwin	516102	4976402.67	44.940869	-92.795909	5	N	MAH00150	2015	8	26	13	52.44111111	276.5	0.533333333
Belwin	516102	4976402.67	44.940869	-92.795909	5	N	MAH00150	2015	8	26	13	56.08388889	165.25	0.625
Belwin	516102	4976402.67	44.940869	-92.795909	5	N	MAH00150	2015	8	26	13	57.73055556	167	0.925
Belwin	516102	4976402.67	44.940869	-92.795909	5	P	MAH00150	2015	8	26	14	0.452777778	38.75	2.125
Belwin	516102	4976402.67	44.940869	-92.795909	5	P	MAH00150	2015	8	26	14	2.063333333	191.5	0.525
Belwin	516102	4976402.67	44.940869	-92.795909	5	N	MAH00150	2015	8	26	14	7.413888889	158.25	0.666666667
Belwin	516102	4976402.67	44.940869	-92.795909	5	N	MAH00150	2015	8	26	14	9.553333333	170.5	0.75
Belwin	516102	4976402.67	44.940869	-92.795909	5	P	MAH00150	2015	8	26	14	12.67055556	150.5	0.733333333
Belwin	516102	4976402.67	44.940869	-92.795909	5	N	MAH00150	2015	8	26	14	14.24555556	270.5	1.016666667
Belwin	516102	4976402.67	44.940869	-92.795909	5	N	MAH00150	2015	8	26	14	18.00222222	89	0.858333333
Belwin	516102	4976402.67	44.940869	-92.795909	5	P	MAH00150	2015	8	26	14	19.04222222	24.75	1.466666667
Belwin	516102	4976402.67	44.940869	-92.795909	6	N	MAH00152	2015	8	26	15	0.143333333	48.75	1.958333333
Belwin	516102	4976402.67	44.940869	-92.795909	6	P	MAH00152	2015	8	26	15	0.208333333	137	0.691666667
Belwin	516102	4976402.67	44.940869	-92.795909	6	P	MAH00152	2015	8	26	15	2.185555556	125	0.416666667
Belwin	516102	4976402.67	44.940869	-92.795909	6	N	MAH00152	2015	8	26	15	7.638333333	243.5	0.8
Belwin	516102	4976402.67	44.940869	-92.795909	6	N	MAH00152	2015	8	26	15	10.20111111	319.25	0.658333333
Belwin	516102	4976402.67	44.940869	-92.795909	6	N	MAH00152	2015	8	26	15	10.755	231.5	0.733333333
Belwin	516102	4976402.67	44.940869	-92.795909	6	N	MAH00152	2015	8	26	15	14.38666667	289.5	0.658333333
Belwin	516102	4976402.67	44.940869	-92.795909	6	P	MAH00152	2015	8	26	15	17.13666667	118.5	1.325
Belwin	516102	4976402.67	44.940869	-92.795909	6	N	MAH00152	2015	8	26	15	17.16611111	145	0.825
Belwin	516102	4976402.67	44.940869	-92.795909	6	N	MAH00152	2015	8	26	15	19.09388889	146.5	0.758333333
Belwin	516102	4976402.67	44.940869	-92.795909	6	P	MAH00152	2015	8	26	15	28.98222222	77.25	1.566666667
Belwin	516102	4976402.67	44.940869	-92.795909	6	N	MAH00152	2015	8	26	15	34.40777778	142	0.708333333
Belwin	516102	4976402.67	44.940869	-92.795909	6	N	MAH00152	2015	8	26	15	37.755	46.25	2.075
Belwin	516102	4976402.67	44.940869	-92.795909	6	N	MAH00152	2015	8	26	15	38.08444444	302	0.816666667
Belwin	516102	4976402.67	44.940869	-92.795909	6	P	MAH00152	2015	8	26	15	42.65	65	1.241666667
Belwin	516102	4976402.67	44.940869	-92.795909	4	P	MAH00157	2015	9	1	10	19.39666667	230.75	0.966666667
Belwin	516102	4976402.67	44.940869	-92.795909	4	N	MAH00157	2015	9	1	10	21.96277778	298.5	0.958333333
Belwin	516102	4976402.67	44.940869	-92.795909	4	N	MAH00157	2015	9	1	10	24.69444444	80.25	1.708333333
Belwin	516102	4976402.67	44.940869	-92.795909	4	N	MAH00157	2015	9	1	10	25.82555556	95.25	1.516666667
Belwin	516102	4976402.67	44.940869	-92.795909	4	N	MAH00157	2015	9	1	10	26.54055556	127	2.416666667
Belwin	516102	4976402.67	44.940869	-92.795909	4	P	MAH00157	2015	9	1	10	27.65666667	136.75	1.591666667
Belwin	516102	4976402.67	44.940869	-92.795909	4	P	MAH00157	2015	9	1	10	28.97	111.25	0.933333333
Belwin	516102	4976402.67	44.940869	-92.795909	4	N	MAH00157	2015	9	1	10	30.33611111	274.5	0.841666667
Belwin	516102	4976402.67	44.940869	-92.795909	4	P	MAH00157	2015	9	1	10	31.28666667	13.75	0.466666667
Belwin	516102	4976402.67	44.940869	-92.795909	4	N	MAH00157	2015	9	1	10	32.98388889	160.25	2.216666667
Belwin	516102	4976402.67	44.940869	-92.795909	4	N	MAH00157	2015	9	1	10	40.725	237.75	1.033333333
Belwin	516102	4976402.67	44.940869	-92.795909	4	P	MAH00157	2015	9	1	10	45.51833333	165.75	1.383333333
Belwin	516102	4976402.67	44.940869	-92.795909	4	N	MAH00157	2015	9	1	10	48.68111111	0.75	1.116666667
Belwin	516102	4976402.67	44.940869	-92.795909	4	N	MAH00157	2015	9	1	10	51.93722222	110.25	2.116666667
Belwin	516102	4976402.67	44.940869	-92.795909	4	P	MAH00157	2015	9	1	10	53.17777778	39.75	0.708333333
Belwin	516102	4976402.67	44.940869	-92.795909	4	N	MAH00157	2015	9	1	10	57.365	317.25	0.741666667
Belwin	516102	4976402.67	44.940869	-92.795909	4	P	MAH00157	2015	9	1	11	1.562777778	249.75	1.05
Belwin	516102	4976402.67	44.940869	-92.795909	4	P	MAH00157	2015	9	1	11	6.591111111	354	1.275
Belwin	516102	4976402.67	44.940869	-92.795909	5	N	MAH00158	2015	9	1	11	23.18166667	172.25	1.366666667
Belwin	516102	4976402.67	44.940869	-92.795909	5	P	MAH00158	2015	9	1	11	24.27722222	118.25	1.608333333
Belwin	516102	4976402.67	44.940869	-92.795909	5	N	MAH00158	2015	9	1	11	25.04333333	116.75	1.158333333
Belwin	516102	4976402.67	44.940869	-92.795909	5	N	MAH00158	2015	9	1	11	28.35055556	108.75	1.083333333
Belwin	516102	4976402.67	44.940869	-92.795909	5	P	MAH00158	2015	9	1	11	28.66055556	141	1.9
Belwin	516102	4976402.67	44.940869	-92.795909	5	N	MAH00158	2015	9	1	11	30.43333333	357	1.083333333
Belwin	516102	4976402.67	44.940869	-92.795909	5	P	MAH00158	2015	9	1	11	31.73277778	0.5	0.491666667
Belwin	516102	4976402.67	44.940869	-92.795909	5	P	MAH00158	2015	9	1	11	34.42	86	0.783333333
Belwin	516102	4976402.67	44.940869	-92.795909	5	N	MAH00158	2015	9	1	11	37.65555556	214.25	0.6
Belwin	516102	4976402.67	44.940869	-92.795909	5	P	MAH00158	2015	9	1	11	40.76166667	146.5	1.758333333
Belwin	516102	4976402.67	44.940869	-92.795909	5	N	MAH00158	2015	9	1	11	44.63722222	129.5	1.691666667
Belwin	516102	4976402.67	44.940869	-92.795909	5	N	MAH00158	2015	9	1	11	46.56611111	110.75	1.85
Belwin	516102	4976402.67	44.940869	-92.795909	5	N	MAH00158	2015	9	1	11	51.23055556	33	3.733333333
Belwin	516102	4976402.67	44.940869	-92.795909	5	N	MAH00158	2015	9	1	11	53.16222222	18.5	0.383333333
Belwin	516102	4976402.67	44.940869	-92.795909	5	N	MAH00158	2015	9	1	11	56.08111111	135.75	1.108333333
Belwin	516102	4976402.67	44.940869	-92.795909	5	P	MAH00158	2015	9	1	12	0.946666667	121.5	1.45
Belwin	516102	4976402.67	44.940869	-92.795909	5	P	MAH00158	2015	9	1	12	8.566111111	348.25	0.566666667
Belwin	516102	4976402.67	44.940869	-92.795909	6	N	MAH00156	2015	9	1	9	35.13722222	30.75	0.775
Belwin	516102	4976402.67	44.940869	-92.795909	6	P	MAH00156	2015	9	1	9	41.275	17.5	0.766666667
Belwin	516102	4976402.67	44.940869	-92.795909	6	P	MAH00156	2015	9	1	9	44.37333333	18.25	0.85
Belwin	516102	4976402.67	44.940869	-92.795909	6	P	MAH00156	2015	9	1	9	47.16277778	21.25	1.025
Belwin	516102	4976402.67	44.940869	-92.795909	6	N	MAH00156	2015	9	1	9	48.51944444	313.25	1.966666667
Belwin	516102	4976402.67	44.940869	-92.795909	6	N	MAH00156	2015	9	1	9	49.48722222	17.5	0.775
Belwin	516102	4976402.67	44.940869	-92.795909	6	N	MAH00156	2015	9	1	9	49.81388889	232.25	2.158333333
Belwin	516102	4976402.67	44.940869	-92.795909	6	N	MAH00156	2015	9	1	9	50.95166667	309	2.116666667
Belwin	516102	4976402.67	44.940869	-92.795909	6	P	MAH00156	2015	9	1	9	51.38	309	2.541666667
Belwin	516102	4976402.67	44.940869	-92.795909	6	P	MAH00156	2015	9	1	9	53.125	271.5	2.35
Belwin	516102	4976402.67	44.940869	-92.795909	6	N	MAH00156	2015	9	1	9	55.46222222	354	0.408333333
Belwin	516102	4976402.67	44.940869	-92.795909	6	N	MAH00156	2015	9	1	10	7.53	277.5	2.083333333
Belwin	516102	4976402.67	44.940869	-92.795909	7	N	MAH00171	2016	5	17	13	23.11722222	142.25	0.4
Belwin	516102	4976402.67	44.940869	-92.795909	7	N	MAH00171	2016	5	17	13	25.98333333	147	0.333333333
Belwin	516102	4976402.67	44.940869	-92.795909	7	N	MAH00171	2016	5	17	13	28.53111111	98.25	1.075
Belwin	516102	4976402.67	44.940869	-92.795909	7	P	MAH00171	2016	5	17	13	37.52277778	115.25	0.475
Belwin	516102	4976402.67	44.940869	-92.795909	7	N	MAH00171	2016	5	17	13	43.75611111	135.5	2.066666667
Belwin	516102	4976402.67	44.940869	-92.795909	7	N	MAH00171	2016	5	17	13	48.19	154.5	1.4
Belwin	516102	4976402.67	44.940869	-92.795909	7	N	MAH00171	2016	5	17	13	49.73611111	122	1.416666667
Belwin	516102	4976402.67	44.940869	-92.795909	7	N	MAH00171	2016	5	17	13	51.22777778	339	0.358333333
Belwin	516102	4976402.67	44.940869	-92.795909	7	P	MAH00171	2016	5	17	13	51.96166667	158	0.675
Belwin	516102	4976402.67	44.940869	-92.795909	7	P	MAH00171	2016	5	17	13	58.09111111	185.75	0.433333333
Belwin	516102	4976402.67	44.940869	-92.795909	7	P	MAH00171	2016	5	17	14	2.615	153.25	2.083333333
Belwin	516102	4976402.67	44.940869	-92.795909	7	N	MAH00172	2016	5	17	14	18.54944444	165.25	0.341666667
Belwin	516102	4976402.67	44.940869	-92.795909	7	N	MAH00172	2016	5	17	14	18.99444444	102.75	1.616666667
Belwin	516102	4976402.67	44.940869	-92.795909	7	N	MAH00172	2016	5	17	14	21.56611111	135.25	0.666666667
Belwin	516102	4976402.67	44.940869	-92.795909	8	P	MAH00170	2016	5	17	12	22.27666667	164	1.441666667
Belwin	516102	4976402.67	44.940869	-92.795909	8	P	MAH00170	2016	5	17	12	23.60388889	176.5	0.325
Belwin	516102	4976402.67	44.940869	-92.795909	8	N	MAH00170	2016	5	17	12	26.78444444	135	1.183333333
Belwin	516102	4976402.67	44.940869	-92.795909	8	N	MAH00170	2016	5	17	12	27.25722222	188.75	0.983333333
Belwin	516102	4976402.67	44.940869	-92.795909	8	N	MAH00170	2016	5	17	12	28.47277778	42.25	0.341666667
Belwin	516102	4976402.67	44.940869	-92.795909	8	N	MAH00170	2016	5	17	12	29.06666667	169.5	1.158333333
Belwin	516102	4976402.67	44.940869	-92.795909	8	P	MAH00170	2016	5	17	12	32.67888889	154.75	0.791666667
Belwin	516102	4976402.67	44.940869	-92.795909	8	P	MAH00170	2016	5	17	12	34.14277778	263	0.375
Belwin	516102	4976402.67	44.940869	-92.795909	8	P	MAH00170	2016	5	17	12	35.46333333	92.25	0.375
Belwin	516102	4976402.67	44.940869	-92.795909	8	N	MAH00170	2016	5	17	12	36.50277778	194.5	0.616666667
Belwin	516102	4976402.67	44.940869	-92.795909	8	N	MAH00170	2016	5	17	12	36.91833333	0	0.283333333
Belwin	516102	4976402.67	44.940869	-92.795909	8	N	MAH00170	2016	5	17	12	39.69888889	7	1.408333333
Belwin	516102	4976402.67	44.940869	-92.795909	8	N	MAH00170	2016	5	17	12	48.43	158	1.2
Belwin	516102	4976402.67	44.940869	-92.795909	8	N	MAH00170	2016	5	17	12	55.00444444	234.25	0.325
Belwin	516102	4976402.67	44.940869	-92.795909	8	N	MAH00170	2016	5	17	12	57.64555556	11.5	0.341666667
Belwin	516102	4976402.67	44.940869	-92.795909	9	P	MAH00169	2016	5	17	10	28.39111111	216.25	0.558333333
Belwin	516102	4976402.67	44.940869	-92.795909	9	N	MAH00169	2016	5	17	10	45.42333333	182.25	0.85
Belwin	516102	4976402.67	44.940869	-92.795909	9	P	MAH00169	2016	5	17	10	48.60222222	109.75	0.975
Belwin	516102	4976402.67	44.940869	-92.795909	9	N	MAH00169	2016	5	17	10	51.85666667	214	0.575
Belwin	516102	4976402.67	44.940869	-92.795909	9	P	MAH00169	2016	5	17	10	53.04666667	100	0.383333333
Belwin	516102	4976402.67	44.940869	-92.795909	9	N	MAH00169	2016	5	17	10	54.72222222	205.5	0.791666667
Belwin	516102	4976402.67	44.940869	-92.795909	9	P	MAH00169	2016	5	17	10	55.43333333	215.5	0.366666667
Belwin	516102	4976402.67	44.940869	-92.795909	9	N	MAH00169	2016	5	17	11	2.351111111	331	0.358333333
Belwin	516102	4976402.67	44.940869	-92.795909	9	N	MAH00188	2016	5	24	13	58.23111111	105.25	0.516666667
Belwin	516102	4976402.67	44.940869	-92.795909	9	P	MAH00188	2016	5	24	13	58.40888889	159.25	0.45
Belwin	516102	4976402.67	44.940869	-92.795909	9	N	MAH00188	2016	5	24	13	59.72888889	89.25	0.616666667
Belwin	516102	4976402.67	44.940869	-92.795909	9	N	MAH00188	2016	5	24	13	59.74666667	132.75	2.125
Belwin	516102	4976402.67	44.940869	-92.795909	9	N	MAH00188	2016	5	24	14	1.504444444	355.5	1.033333333
Belwin	516102	4976402.67	44.940869	-92.795909	9	N	MAH00188	2016	5	24	14	2.027777778	149.25	1.45
Belwin	516102	4976402.67	44.940869	-92.795909	9	P	MAH00188	2016	5	24	14	9.697222222	256.25	0.458333333
Belwin	516102	4976402.67	44.940869	-92.795909	9	N	MAH00188	2016	5	24	14	10.43388889	109.5	2.483333333
Belwin	516102	4976402.67	44.940869	-92.795909	9	N	MAH00188	2016	5	24	14	24.67388889	353.5	0.991666667
Belwin	516102	4976402.67	44.940869	-92.795909	9	N	MAH00188	2016	5	24	14	24.84722222	88.5	0.716666667
Belwin	516102	4976402.67	44.940869	-92.795909	9	N	MAH00188	2016	5	24	14	26.97111111	293	0.358333333
Belwin	516102	4976402.67	44.940869	-92.795909	9	N	MAH00188	2016	5	24	14	35.05833333	66.25	4.108333333
Belwin	516102	4976402.67	44.940869	-92.795909	9	P	MAH00188	2016	5	24	14	45.09277778	92.5	2.141666667
Belwin	516102	4976402.67	44.940869	-92.795909	9	P	MAH00188	2016	5	24	14	47.65833333	56.5	2.291666667
Belwin	516102	4976402.67	44.940869	-92.795909	7	N	MAH00196	2016	6	1	10	40.215	302.75	2.116666667
Belwin	516102	4976402.67	44.940869	-92.795909	7	N	MAH00196	2016	6	1	10	41.60222222	284.75	1.8
Belwin	516102	4976402.67	44.940869	-92.795909	7	N	MAH00196	2016	6	1	10	43.98222222	316.25	1.275
Belwin	516102	4976402.67	44.940869	-92.795909	7	P	MAH00196	2016	6	1	10	46.95	347.5	1.008333333
Belwin	516102	4976402.67	44.940869	-92.795909	7	N	MAH00196	2016	6	1	10	56.01333333	157	1.15
Belwin	516102	4976402.67	44.940869	-92.795909	7	P	MAH00196	2016	6	1	10	56.44111111	317.25	1.9
Belwin	516102	4976402.67	44.940869	-92.795909	7	N	MAH00196	2016	6	1	10	58.84444444	309.75	1.691666667
Belwin	516102	4976402.67	44.940869	-92.795909	7	N	MAH00196	2016	6	1	11	4.936111111	314.75	1.316666667
Belwin	516102	4976402.67	44.940869	-92.795909	7	N	MAH00196	2016	6	1	11	10.51777778	307.25	1.533333333
Belwin	516102	4976402.67	44.940869	-92.795909	7	N	MAH00196	2016	6	1	11	11.29833333	319.75	1.491666667
Belwin	516102	4976402.67	44.940869	-92.795909	7	P	MAH00196	2016	6	1	11	12.44666667	157	1.175
Belwin	516102	4976402.67	44.940869	-92.795909	7	P	MAH00196	2016	6	1	11	13.73722222	291.5	0.725
Belwin	516102	4976402.67	44.940869	-92.795909	7	N	MAH00196	2016	6	1	11	14.05666667	310	1.283333333
Belwin	516102	4976402.67	44.940869	-92.795909	7	N	MAH00196	2016	6	1	11	15.875	275.75	1.783333333
Belwin	516102	4976402.67	44.940869	-92.795909	8	P	MAH00195	2016	6	1	9	40.62333333	3.25	0.666666667
Belwin	516102	4976402.67	44.940869	-92.795909	8	N	MAH00195	2016	6	1	10	4.772777778	344.25	3.425
Belwin	516102	4976402.67	44.940869	-92.795909	8	N	MAH00195	2016	6	1	10	9.33	342	2.841666667
Belwin	516102	4976402.67	44.940869	-92.795909	8	N	MAH00195	2016	6	1	10	11.89333333	341.25	3.1
Belwin	516102	4976402.67	44.940869	-92.795909	8	N	MAH00195	2016	6	1	10	15.74	273.75	4
Belwin	516102	4976402.67	44.940869	-92.795909	8	P	MAH00195	2016	6	1	10	17.33611111	279.75	1.741666667
Belwin	516102	4976402.67	44.940869	-92.795909	8	N	MAH00195	2016	6	1	10	18.68611111	306.25	4.016666667
Belwin	516102	4976402.67	44.940869	-92.795909	8	N	MAH00195	2016	6	1	10	19.01166667	271.25	3.983333333
Belwin	516102	4976402.67	44.940869	-92.795909	9	P	MAH00197	2016	6	1	11	40.11722222	282.5	1.566666667
Belwin	516102	4976402.67	44.940869	-92.795909	9	N	MAH00197	2016	6	1	11	42.735	121.25	2.883333333
Belwin	516102	4976402.67	44.940869	-92.795909	9	P	MAH00197	2016	6	1	11	52.28555556	165.75	1.708333333
Belwin	516102	4976402.67	44.940869	-92.795909	9	N	MAH00197	2016	6	1	12	10.04666667	251	1.458333333
Belwin	516102	4976402.67	44.940869	-92.795909	9	N	MAH00197	2016	6	1	12	14.28777778	248.75	2.958333333
Belwin	516102	4976402.67	44.940869	-92.795909	9	P	MAH00197	2016	6	1	12	16.38611111	285	0.516666667
Belwin	516102	4976402.67	44.940869	-92.795909	7	N	MAH00210	2016	6	8	10	46.42388889	156.25	0.791666667
Belwin	516102	4976402.67	44.940869	-92.795909	7	N	MAH00210	2016	6	8	10	47.08277778	320.5	0.458333333
Belwin	516102	4976402.67	44.940869	-92.795909	7	N	MAH00210	2016	6	8	10	50.455	333.75	0.666666667
Belwin	516102	4976402.67	44.940869	-92.795909	7	P	MAH00210	2016	6	8	10	51.07388889	286	2.458333333
Belwin	516102	4976402.67	44.940869	-92.795909	7	N	MAH00210	2016	6	8	10	55.79	143	1.091666667
Belwin	516102	4976402.67	44.940869	-92.795909	7	P	MAH00210	2016	6	8	10	57.055	197.25	1.883333333
Belwin	516102	4976402.67	44.940869	-92.795909	7	N	MAH00210	2016	6	8	11	5.041111111	345.5	6.191666667
Belwin	516102	4976402.67	44.940869	-92.795909	7	N	MAH00210	2016	6	8	11	7.117222222	36	2.841666667
Belwin	516102	4976402.67	44.940869	-92.795909	7	N	MAH00210	2016	6	8	11	9.765555556	351.75	0.766666667
Belwin	516102	4976402.67	44.940869	-92.795909	7	N	MAH00210	2016	6	8	11	20.18777778	189.25	2.75
Belwin	516102	4976402.67	44.940869	-92.795909	7	P	MAH00210	2016	6	8	11	22.03333333	314.25	2.391666667
Belwin	516102	4976402.67	44.940869	-92.795909	7	N	MAH00210	2016	6	8	11	26.28055556	82	0.816666667
Belwin	516102	4976402.67	44.940869	-92.795909	7	N	MAH00210	2016	6	8	11	30.47055556	179.25	2.9
Belwin	516102	4976402.67	44.940869	-92.795909	8	N	MAH00208	2016	6	8	9	58.89944444	15.75	0.65
Belwin	516102	4976402.67	44.940869	-92.795909	8	N	MAH00208	2016	6	8	10	3.405555556	141.5	2.458333333
Belwin	516102	4976402.67	44.940869	-92.795909	8	P	MAH00208	2016	6	8	10	9.471111111	95.5	0.391666667
Belwin	516102	4976402.67	44.940869	-92.795909	8	N	MAH00208	2016	6	8	10	11.295	33.75	2
Belwin	516102	4976402.67	44.940869	-92.795909	8	P	MAH00208	2016	6	8	10	13.78388889	37	0.333333333
Belwin	516102	4976402.67	44.940869	-92.795909	8	N	MAH00208	2016	6	8	10	19.57333333	19.75	1.95
Belwin	516102	4976402.67	44.940869	-92.795909	8	N	MAH00208	2016	6	8	10	19.92611111	353	0.433333333
Belwin	516102	4976402.67	44.940869	-92.795909	8	N	MAH00208	2016	6	8	10	20.68444444	255	2.083333333
Belwin	516102	4976402.67	44.940869	-92.795909	8	N	MAH00208	2016	6	8	10	22.66277778	269	2.433333333
Belwin	516102	4976402.67	44.940869	-92.795909	8	N	MAH00208	2016	6	8	10	23.89277778	108	0.633333333
Belwin	516102	4976402.67	44.940869	-92.795909	8	N	MAH00208	2016	6	8	10	25.82666667	87.25	0.566666667
Belwin	516102	4976402.67	44.940869	-92.795909	9	P	MAH00211	2016	6	8	11	44.13333333	212.5	2.366666667
Belwin	516102	4976402.67	44.940869	-92.795909	9	N	MAH00211	2016	6	8	11	44.33	70.25	0.633333333
Belwin	516102	4976402.67	44.940869	-92.795909	9	N	MAH00211	2016	6	8	11	46.33055556	206	1.683333333
Belwin	516102	4976402.67	44.940869	-92.795909	9	P	MAH00211	2016	6	8	11	53.26055556	251	2.975
Belwin	516102	4976402.67	44.940869	-92.795909	9	P	MAH00211	2016	6	8	11	55.46777778	332.25	0.308333333
Belwin	516102	4976402.67	44.940869	-92.795909	9	P	MAH00211	2016	6	8	11	56.31055556	5.25	2.766666667
Belwin	516102	4976402.67	44.940869	-92.795909	9	P	MAH00211	2016	6	8	11	58.54388889	214.75	2.591666667
Belwin	516102	4976402.67	44.940869	-92.795909	9	P	MAH00211	2016	6	8	12	4.606111111	221.75	3.158333333
Belwin	516102	4976402.67	44.940869	-92.795909	9	N	MAH00211	2016	6	8	12	5.886666667	216.25	0.791666667
Belwin	516102	4976402.67	44.940869	-92.795909	9	P	MAH00211	2016	6	8	12	7.037222222	229.5	2.475
Belwin	516102	4976402.67	44.940869	-92.795909	9	N	MAH00211	2016	6	8	12	10.47611111	54.5	0.6
Belwin	516102	4976402.67	44.940869	-92.795909	9	N	MAH00211	2016	6	8	12	13.53	189.25	3.508333333
Belwin	516102	4976402.67	44.940869	-92.795909	9	N	MAH00211	2016	6	8	12	16.675	175	0.95
Belwin	516102	4976402.67	44.940869	-92.795909	9	N	MAH00211	2016	6	8	12	18.53444444	187.25	1.641666667
Belwin	516102	4976402.67	44.940869	-92.795909	9	N	MAH00211	2016	6	8	12	21.79111111	159.5	2.283333333
Belwin	516102	4976402.67	44.940869	-92.795909	9	P	MAH00211	2016	6	8	12	24.35111111	138.5	6.458333333
Belwin	516102	4976402.67	44.940869	-92.795909	9	N	MAH00211	2016	6	8	12	28.89777778	166	2.116666667
Belwin	516102	4976402.67	44.940869	-92.795909	9	N	MAH00211	2016	6	8	12	30.405	89.75	0.4
Belwin	516102	4976402.67	44.940869	-92.795909	7	N	MAH00219	2016	6	15	14	49.81555556	228.25	1.033333333
Belwin	516102	4976402.67	44.940869	-92.795909	7	N	MAH00219	2016	6	15	14	49.83222222	41	0.558333333
Belwin	516102	4976402.67	44.940869	-92.795909	7	N	MAH00219	2016	6	15	14	50.175	48.75	2.808333333
Belwin	516102	4976402.67	44.940869	-92.795909	7	P	MAH00219	2016	6	15	14	51.26722222	143.5	1.133333333
Belwin	516102	4976402.67	44.940869	-92.795909	7	N	MAH00219	2016	6	15	14	51.36944444	145.25	1.058333333
Belwin	516102	4976402.67	44.940869	-92.795909	7	P	MAH00219	2016	6	15	14	54.77111111	141	0.925
Belwin	516102	4976402.67	44.940869	-92.795909	7	N	MAH00219	2016	6	15	14	56.68	232.5	1.25
Belwin	516102	4976402.67	44.940869	-92.795909	7	P	MAH00219	2016	6	15	14	58.30888889	59	1.833333333
Belwin	516102	4976402.67	44.940869	-92.795909	7	N	MAH00219	2016	6	15	14	59.185	123.75	1.583333333
Belwin	516102	4976402.67	44.940869	-92.795909	7	N	MAH00219	2016	6	15	14	59.95666667	231.5	1.116666667
Belwin	516102	4976402.67	44.940869	-92.795909	7	N	MAH00219	2016	6	15	15	2.290555556	82.5	1.85
Belwin	516102	4976402.67	44.940869	-92.795909	7	N	MAH00219	2016	6	15	15	3.297777778	46	2.3
Belwin	516102	4976402.67	44.940869	-92.795909	7	P	MAH00219	2016	6	15	15	11.11166667	253.25	0.366666667
Belwin	516102	4976402.67	44.940869	-92.795909	7	N	MAH00219	2016	6	15	15	19.29666667	120.75	2.466666667
Belwin	516102	4976402.67	44.940869	-92.795909	8	P	MAH00218	2016	6	15	13	50.125	171.5	0.85
Belwin	516102	4976402.67	44.940869	-92.795909	8	N	MAH00218	2016	6	15	13	53.01388889	156.25	2.691666667
Belwin	516102	4976402.67	44.940869	-92.795909	8	P	MAH00218	2016	6	15	13	53.37277778	98.5	2.1
Belwin	516102	4976402.67	44.940869	-92.795909	8	N	MAH00218	2016	6	15	13	56.64111111	159.75	2.858333333
Belwin	516102	4976402.67	44.940869	-92.795909	8	N	MAH00218	2016	6	15	13	57.84166667	61.75	1.925
Belwin	516102	4976402.67	44.940869	-92.795909	8	N	MAH00218	2016	6	15	14	0.478333333	162	2.475
Belwin	516102	4976402.67	44.940869	-92.795909	8	P	MAH00218	2016	6	15	14	3.774444444	120.25	1.433333333
Belwin	516102	4976402.67	44.940869	-92.795909	8	N	MAH00218	2016	6	15	14	5.574444444	53	1.666666667
Belwin	516102	4976402.67	44.940869	-92.795909	8	N	MAH00218	2016	6	15	14	11.61277778	42.25	2.7
Belwin	516102	4976402.67	44.940869	-92.795909	8	P	MAH00218	2016	6	15	14	11.99111111	140.75	1.383333333
Belwin	516102	4976402.67	44.940869	-92.795909	8	N	MAH00218	2016	6	15	14	18.78888889	136.5	1.375
Belwin	516102	4976402.67	44.940869	-92.795909	8	N	MAH00218	2016	6	15	14	23.49555556	202.25	1.3
Belwin	516102	4976402.67	44.940869	-92.795909	8	N	MAH00218	2016	6	15	14	24.16666667	70	1.341666667
Belwin	516102	4976402.67	44.940869	-92.795909	8	N	MAH00218	2016	6	15	14	27.79277778	211	1.158333333
Belwin	516102	4976402.67	44.940869	-92.795909	8	P	MAH00218	2016	6	15	14	35.32777778	59.25	1.741666667
Belwin	516102	4976402.67	44.940869	-92.795909	9	P	MAH00220	2016	6	15	15	44.43777778	60	1.683333333
Belwin	516102	4976402.67	44.940869	-92.795909	9	P	MAH00220	2016	6	15	15	45.84555556	102.5	1.366666667
Belwin	516102	4976402.67	44.940869	-92.795909	9	N	MAH00220	2016	6	15	15	47.16111111	233.25	1.3
Belwin	516102	4976402.67	44.940869	-92.795909	9	P	MAH00220	2016	6	15	15	48.54333333	243.25	0.733333333
Belwin	516102	4976402.67	44.940869	-92.795909	9	P	MAH00220	2016	6	15	15	53.28055556	62.75	1.525
Belwin	516102	4976402.67	44.940869	-92.795909	9	N	MAH00220	2016	6	15	15	55.51777778	227.75	1.4
Belwin	516102	4976402.67	44.940869	-92.795909	9	N	MAH00220	2016	6	15	15	55.83944444	120	1.158333333
Belwin	516102	4976402.67	44.940869	-92.795909	9	N	MAH00220	2016	6	15	16	0.028333333	92.5	1.691666667
Belwin	516102	4976402.67	44.940869	-92.795909	9	N	MAH00220	2016	6	15	16	0.266666667	234	1.641666667
Belwin	516102	4976402.67	44.940869	-92.795909	9	N	MAH00220	2016	6	15	16	1.331666667	36.5	1.833333333
Belwin	516102	4976402.67	44.940869	-92.795909	9	N	MAH00220	2016	6	15	16	12.98666667	125.75	1.558333333
Belwin	516102	4976402.67	44.940869	-92.795909	9	N	MAH00220	2016	6	15	16	13.305	58	2.275
Belwin	516102	4976402.67	44.940869	-92.795909	9	P	MAH00220	2016	6	15	16	18	98	1.541666667
Belwin	516102	4976402.67	44.940869	-92.795909	9	P	MAH00220	2016	6	15	16	20.16666667	117.5	2.041666667
Belwin	516102	4976402.67	44.940869	-92.795909	9	N	MAH00220	2016	6	15	16	26.83944444	105.5	1.116666667
Belwin	516102	4976402.67	44.940869	-92.795909	9	P	MAH00220	2016	6	15	16	28.41	114.25	0.958333333
Belwin	516102	4976402.67	44.940869	-92.795909	9	N	MAH00220	2016	6	15	16	31.91722222	96	2.258333333
Belwin	516102	4976402.67	44.940869	-92.795909	7	P	MAH00236	2016	6	24	12	23.21611111	143	1.491666667
Belwin	516102	4976402.67	44.940869	-92.795909	7	N	MAH00236	2016	6	24	12	24.32666667	173.75	0.558333333
Belwin	516102	4976402.67	44.940869	-92.795909	7	N	MAH00236	2016	6	24	12	25.515	218.5	1.683333333
Belwin	516102	4976402.67	44.940869	-92.795909	7	P	MAH00236	2016	6	24	12	25.61944444	222.5	2.125
Belwin	516102	4976402.67	44.940869	-92.795909	7	N	MAH00236	2016	6	24	12	30.75444444	136.5	0.775
Belwin	516102	4976402.67	44.940869	-92.795909	7	P	MAH00236	2016	6	24	12	32.65555556	197	1.841666667
Belwin	516102	4976402.67	44.940869	-92.795909	7	N	MAH00236	2016	6	24	12	40.23611111	154.25	2.558333333
Belwin	516102	4976402.67	44.940869	-92.795909	7	P	MAH00236	2016	6	24	12	41.93111111	228.75	1.891666667
Belwin	516102	4976402.67	44.940869	-92.795909	7	N	MAH00236	2016	6	24	12	48.82888889	189.75	2.125
Belwin	516102	4976402.67	44.940869	-92.795909	7	N	MAH00236	2016	6	24	12	49.67777778	124.5	1.925
Belwin	516102	4976402.67	44.940869	-92.795909	8	N	MAH00234	2016	6	24	11	30.68777778	337	1.433333333
Belwin	516102	4976402.67	44.940869	-92.795909	8	N	MAH00234	2016	6	24	11	33.46833333	159	1.458333333
Belwin	516102	4976402.67	44.940869	-92.795909	8	N	MAH00234	2016	6	24	11	38.205	253.25	2.591666667
Belwin	516102	4976402.67	44.940869	-92.795909	8	N	MAH00234	2016	6	24	11	41.74555556	259	1.95
Belwin	516102	4976402.67	44.940869	-92.795909	8	N	MAH00234	2016	6	24	11	42.48777778	311	1.716666667
Belwin	516102	4976402.67	44.940869	-92.795909	8	N	MAH00234	2016	6	24	11	46.20166667	306.25	1.641666667
Belwin	516102	4976402.67	44.940869	-92.795909	8	N	MAH00234	2016	6	24	11	47.12388889	125.25	2.4
Belwin	516102	4976402.67	44.940869	-92.795909	8	P	MAH00234	2016	6	24	11	48.41388889	258.5	2.166666667
Belwin	516102	4976402.67	44.940869	-92.795909	8	N	MAH00234	2016	6	24	11	50.22666667	4.25	1.516666667
Belwin	516102	4976402.67	44.940869	-92.795909	8	N	MAH00234	2016	6	24	11	51.72388889	298.25	1.65
Belwin	516102	4976402.67	44.940869	-92.795909	8	P	MAH00235	2016	6	24	11	58.10555556	231.25	0.975
Belwin	516102	4976402.67	44.940869	-92.795909	9	N	MAH00233	2016	6	24	10	40.15666667	357.75	1.391666667
Belwin	516102	4976402.67	44.940869	-92.795909	9	P	MAH00233	2016	6	24	10	42.14611111	264.25	2.566666667
Belwin	516102	4976402.67	44.940869	-92.795909	9	N	MAH00233	2016	6	24	10	42.875	254	0.583333333
Belwin	516102	4976402.67	44.940869	-92.795909	9	P	MAH00233	2016	6	24	10	45.24	224.5	1.583333333
Belwin	516102	4976402.67	44.940869	-92.795909	9	N	MAH00233	2016	6	24	10	45.78611111	66	3.508333333
Belwin	516102	4976402.67	44.940869	-92.795909	9	N	MAH00233	2016	6	24	10	46.675	0	1.25
Belwin	516102	4976402.67	44.940869	-92.795909	9	N	MAH00233	2016	6	24	10	47.30444444	238.25	2
Belwin	516102	4976402.67	44.940869	-92.795909	9	P	MAH00233	2016	6	24	10	47.79722222	264.75	2.766666667
Belwin	516102	4976402.67	44.940869	-92.795909	9	N	MAH00233	2016	6	24	10	50.60944444	195.5	2.283333333
Belwin	516102	4976402.67	44.940869	-92.795909	9	P	MAH00233	2016	6	24	10	52.795	187	2.025
Belwin	516102	4976402.67	44.940869	-92.795909	9	N	MAH00233	2016	6	24	10	54.51888889	221.25	2.108333333
Belwin	516102	4976402.67	44.940869	-92.795909	9	P	MAH00233	2016	6	24	10	57.58888889	197	1.683333333
Belwin	516102	4976402.67	44.940869	-92.795909	9	N	MAH00233	2016	6	24	10	57.78388889	353.75	1.35
Belwin	516102	4976402.67	44.940869	-92.795909	9	P	MAH00233	2016	6	24	11	0.177222222	354.25	1.45
Belwin	516102	4976402.67	44.940869	-92.795909	9	N	MAH00233	2016	6	24	11	2.868888889	40.25	0.591666667
Carleton	488948.76	4923159.06	44.46165278	-93.13892222	2	N	MAH00003	2017	5	28	13	34.17222222	19.5	0.4375
Carleton	488948.76	4923159.06	44.46165278	-93.13892222	2	P	MAH00003	2017	5	28	13	34.58680556	-50.25	1.989583333
Carleton	488948.76	4923159.06	44.46165278	-93.13892222	2	P	MAH00003	2017	5	28	13	36.30347222	-30.75	1.302083333
Carleton	488948.76	4923159.06	44.46165278	-93.13892222	2	N	MAH00003	2017	5	28	13	37.34513889	173.5	0.895833333
Carleton	488948.76	4923159.06	44.46165278	-93.13892222	2	N	MAH00003	2017	5	28	13	38.16875	51	0.197916667
Carleton	488948.76	4923159.06	44.46165278	-93.13892222	2	N	MAH00003	2017	5	28	13	38.28819444	61.5	0.75
Carleton	488948.76	4923159.06	44.46165278	-93.13892222	2	N	MAH00003	2017	5	28	13	42.48125	57	1.020833333
Carleton	488948.76	4923159.06	44.46165278	-93.13892222	2	N	MAH00003	2017	5	28	13	44.35833333	65.875	1.125
Carleton	488948.76	4923159.06	44.46165278	-93.13892222	2	N	MAH00003	2017	5	28	13	45.43263889	-34.25	0.375
Carleton	488948.76	4923159.06	44.46165278	-93.13892222	2	P	MAH00003	2017	5	28	13	45.72152778	-29.75	1.739583333
Carleton	488948.76	4923159.06	44.46165278	-93.13892222	2	N	MAH00003	2017	5	28	13	46.54791667	63.25	1.125
Carleton	488948.76	4923159.06	44.46165278	-93.13892222	2	N	MAH00003	2017	5	28	13	49.42291667	85.5	1.0625
Carleton	488948.76	4923159.06	44.46165278	-93.13892222	2	N	MAH00003	2017	5	28	13	49.97291667	19.75	1.46875
Carleton	488948.76	4923159.06	44.46165278	-93.13892222	2	P	MAH00003	2017	5	28	13	51.92222222	-44.75	1.489583333
Carleton	488948.76	4923159.06	44.46165278	-93.13892222	2	P	MAH00003	2017	5	28	13	58.14861111	-163.5	0.96875
Carleton	488948.76	4923159.06	44.46165278	-93.13892222	2	P	MAH00003	2017	5	28	14	4.738194444	-55	1.072916667
Carleton	488948.76	4923159.06	44.46165278	-93.13892222	2	P	MAH00003	2017	5	28	14	5.086111111	-41	1.854166667
Carleton	488948.76	4923159.06	44.46165278	-93.13892222	2	P	MAH00003	2017	5	28	14	7.936111111	-51.75	1.5625
Carleton	488948.76	4923159.06	44.46165278	-93.13892222	2	P	MAH00003	2017	5	28	14	8.832638889	-34.5	1.78125
Carleton	488948.76	4923159.06	44.46165278	-93.13892222	2	P	MAH00003	2017	5	28	14	9.718055556	-64.5	1.604166667
Carleton	488948.76	4923159.06	44.46165278	-93.13892222	1	P	MAH00011	2017	6	4	14	27.60763889	-57.125	1.21875
Carleton	488948.76	4923159.06	44.46165278	-93.13892222	1	P	MAH00011	2017	6	4	14	28.20138889	133	0.635416667
Carleton	488948.76	4923159.06	44.46165278	-93.13892222	1	N	MAH00011	2017	6	4	14	28.98125	135.5	0.635416667
Carleton	488948.76	4923159.06	44.46165278	-93.13892222	1	N	MAH00011	2017	6	4	14	30.54097222	-57.75	1.197916667
Carleton	488948.76	4923159.06	44.46165278	-93.13892222	1	N	MAH00011	2017	6	4	14	31.02430556	-69.5	0.78125
Carleton	488948.76	4923159.06	44.46165278	-93.13892222	1	P	MAH00011	2017	6	4	14	31.16180556	-58	0.635416667
Carleton	488948.76	4923159.06	44.46165278	-93.13892222	1	N	MAH00011	2017	6	4	14	31.42430556	-74	1.635416667
Carleton	488948.76	4923159.06	44.46165278	-93.13892222	1	P	MAH00011	2017	6	4	14	31.82013889	-49.5	0.677083333
Carleton	488948.76	4923159.06	44.46165278	-93.13892222	1	N	MAH00011	2017	6	4	14	31.93333333	-57.25	0.770833333
Carleton	488948.76	4923159.06	44.46165278	-93.13892222	1	P	MAH00011	2017	6	4	14	32.96805556	22.5	1.302083333
Carleton	488948.76	4923159.06	44.46165278	-93.13892222	1	N	MAH00011	2017	6	4	14	33.75416667	16	1.197916667
Carleton	488948.76	4923159.06	44.46165278	-93.13892222	1	N	MAH00011	2017	6	4	14	34.09236111	-62	1.5
Carleton	488948.76	4923159.06	44.46165278	-93.13892222	1	P	MAH00011	2017	6	4	14	34.36319444	-35.25	1.447916667
Carleton	488948.76	4923159.06	44.46165278	-93.13892222	1	N	MAH00011	2017	6	4	14	34.52708333	-61.5	1.177083333
Carleton	488948.76	4923159.06	44.46165278	-93.13892222	1	P	MAH00011	2017	6	4	14	35.35	126.75	0.635416667
Carleton	488948.76	4923159.06	44.46165278	-93.13892222	1	N	MAH00011	2017	6	4	14	35.64444444	-57.75	0.833333333
Carleton	488948.76	4923159.06	44.46165278	-93.13892222	1	P	MAH00011	2017	6	4	14	40.35833333	266.75	1.458333333
Carleton	488948.76	4923159.06	44.46165278	-93.13892222	1	P	MAH00011	2017	6	4	14	40.74375	-70.75	1.802083333
Carleton	488948.76	4923159.06	44.46165278	-93.13892222	1	P	MAH00011	2017	6	4	14	41.46527778	145.5	0.75
Carleton	488948.76	4923159.06	44.46165278	-93.13892222	1	P	MAH00011	2017	6	4	14	54.38472222	-52.25	1.53125
Carleton	488948.76	4923159.06	44.46165278	-93.13892222	1	P	MAH00015	2017	6	7	11	22.25555556	25.375	0.75
Carleton	488948.76	4923159.06	44.46165278	-93.13892222	1	N	MAH00015	2017	6	7	11	22.51111111	52.5	1.0625
Carleton	488948.76	4923159.06	44.46165278	-93.13892222	1	N	MAH00015	2017	6	7	11	23.48055556	82.75	1.833333333
Carleton	488948.76	4923159.06	44.46165278	-93.13892222	1	P	MAH00015	2017	6	7	11	24.42847222	28.5	0.6875
Carleton	488948.76	4923159.06	44.46165278	-93.13892222	1	P	MAH00015	2017	6	7	11	24.74236111	34	0.5
Carleton	488948.76	4923159.06	44.46165278	-93.13892222	1	P	MAH00015	2017	6	7	11	25.10208333	35.5	0.65625
Carleton	488948.76	4923159.06	44.46165278	-93.13892222	1	P	MAH00015	2017	6	7	11	27.30972222	27.5	0.697916667
Carleton	488948.76	4923159.06	44.46165278	-93.13892222	1	P	MAH00015	2017	6	7	11	27.87222222	-24.25	1.510416667
Carleton	488948.76	4923159.06	44.46165278	-93.13892222	1	P	MAH00015	2017	6	7	11	31.02638889	56	1.135416667
Carleton	488948.76	4923159.06	44.46165278	-93.13892222	1	P	MAH00015	2017	6	7	11	32.16041667	34.25	0.895833333
Carleton	488948.76	4923159.06	44.46165278	-93.13892222	1	P	MAH00015	2017	6	7	11	33.45972222	48.75	1.166666667
Carleton	488948.76	4923159.06	44.46165278	-93.13892222	1	P	MAH00015	2017	6	7	11	33.94375	132.5	1.3125
Carleton	488948.76	4923159.06	44.46165278	-93.13892222	1	N	MAH00015	2017	6	7	11	34.6375	156.75	0.5625
Carleton	488948.76	4923159.06	44.46165278	-93.13892222	1	N	MAH00015	2017	6	7	11	40.72638889	-29.5	0.854166667
Carleton	488948.76	4923159.06	44.46165278	-93.13892222	1	N	MAH00015	2017	6	7	11	41.47430556	220.75	0.96875
Carleton	488948.76	4923159.06	44.46165278	-93.13892222	1	N	MAH00015	2017	6	7	11	45.87847222	212.25	0.75
Carleton	488948.76	4923159.06	44.46165278	-93.13892222	1	N	MAH00015	2017	6	7	11	57.01875	114.5	1.145833333
Carleton	488948.76	4923159.06	44.46165278	-93.13892222	1	N	MAH00015	2017	6	7	12	1.538888889	-45.75	1.333333333
Carleton	488948.76	4923159.06	44.46165278	-93.13892222	1	N	MAH00015	2017	6	7	12	9.684722222	-127.5	0.666666667
Carleton	488948.76	4923159.06	44.46165278	-93.13892222	1	N	MAH00015	2017	6	7	12	11.56805556	162	1.239583333
Carleton	488948.76	4923159.06	44.46165278	-93.13892222	2	P	MAH00013	2017	6	7	9	25.56875	-47.5	1.520833333
Carleton	488948.76	4923159.06	44.46165278	-93.13892222	2	P	MAH00013	2017	6	7	9	26.43125	54.5	0.947916667
Carleton	488948.76	4923159.06	44.46165278	-93.13892222	2	P	MAH00013	2017	6	7	9	27.18541667	41	0.604166667
Carleton	488948.76	4923159.06	44.46165278	-93.13892222	2	N	MAH00013	2017	6	7	9	29.38055556	88.75	1.791666667
Carleton	488948.76	4923159.06	44.46165278	-93.13892222	2	N	MAH00013	2017	6	7	9	32.18541667	49	1.40625
Carleton	488948.76	4923159.06	44.46165278	-93.13892222	2	N	MAH00013	2017	6	7	9	33.01736111	-74.5	0.479166667
Carleton	488948.76	4923159.06	44.46165278	-93.13892222	2	P	MAH00013	2017	6	7	9	34.2375	179.75	0.802083333
Carleton	488948.76	4923159.06	44.46165278	-93.13892222	2	N	MAH00013	2017	6	7	9	34.36666667	-72.25	0.6875
Carleton	488948.76	4923159.06	44.46165278	-93.13892222	2	P	MAH00013	2017	6	7	9	34.76597222	-117.75	0.729166667
Carleton	488948.76	4923159.06	44.46165278	-93.13892222	2	N	MAH00013	2017	6	7	9	38.82916667	61.25	0.989583333
Carleton	488948.76	4923159.06	44.46165278	-93.13892222	2	N	MAH00013	2017	6	7	9	39.98194444	-94.25	0.614583333
Carleton	488948.76	4923159.06	44.46165278	-93.13892222	2	P	MAH00013	2017	6	7	9	41.29861111	72.5	1.34375
Carleton	488948.76	4923159.06	44.46165278	-93.13892222	2	P	MAH00013	2017	6	7	9	42.24652778	209.75	1.21875
Carleton	488948.76	4923159.06	44.46165278	-93.13892222	2	P	MAH00013	2017	6	7	9	58.00902778	91.5	0.59375
Carleton	488948.76	4923159.06	44.46165278	-93.13892222	2	N	MAH00013	2017	6	7	9	58.50694444	131.5	0.71875
Carleton	488948.76	4923159.06	44.46165278	-93.13892222	2	N	MAH00013	2017	6	7	9	59.71875	-63	0.510416667
Carleton	488948.76	4923159.06	44.46165278	-93.13892222	2	P	MAH00013	2017	6	7	10	1.020138889	38.75	0.645833333
Carleton	488948.76	4923159.06	44.46165278	-93.13892222	2	P	MAH00013	2017	6	7	10	1.783333333	63	1.166666667
Carleton	488948.76	4923159.06	44.46165278	-93.13892222	2	N	MAH00013	2017	6	7	10	2.563888889	43	1.354166667
Carleton	488948.76	4923159.06	44.46165278	-93.13892222	2	N	MAH00013	2017	6	7	10	3.811805556	27.5	1.208333333
Carleton	488948.76	4923159.06	44.46165278	-93.13892222	3	P	MAH00014	2017	6	7	10	21.64861111	-83	4.854166667
Carleton	488948.76	4923159.06	44.46165278	-93.13892222	3	N	MAH00014	2017	6	7	10	28.64652778	157.25	0.8125
Carleton	488948.76	4923159.06	44.46165278	-93.13892222	3	N	MAH00014	2017	6	7	10	31.22152778	216	1.3125
Carleton	488948.76	4923159.06	44.46165278	-93.13892222	3	P	MAH00014	2017	6	7	10	31.51805556	65	0.677083333
Carleton	488948.76	4923159.06	44.46165278	-93.13892222	3	P	MAH00014	2017	6	7	10	32.23958333	62.5	0.635416667
Carleton	488948.76	4923159.06	44.46165278	-93.13892222	3	P	MAH00014	2017	6	7	10	33.51944444	275.25	4.25
Carleton	488948.76	4923159.06	44.46165278	-93.13892222	3	N	MAH00014	2017	6	7	10	33.95902778	-23.75	1.177083333
Carleton	488948.76	4923159.06	44.46165278	-93.13892222	3	N	MAH00014	2017	6	7	10	34.84861111	145.75	0.729166667
Carleton	488948.76	4923159.06	44.46165278	-93.13892222	3	N	MAH00014	2017	6	7	10	35.28125	-57.25	0.833333333
Carleton	488948.76	4923159.06	44.46165278	-93.13892222	3	P	MAH00014	2017	6	7	10	35.65694444	-91	4.375
Carleton	488948.76	4923159.06	44.46165278	-93.13892222	3	N	MAH00014	2017	6	7	10	35.83819444	-58.5	0.895833333
Carleton	488948.76	4923159.06	44.46165278	-93.13892222	3	P	MAH00014	2017	6	7	10	47.27916667	-87.25	4.010416667
Carleton	488948.76	4923159.06	44.46165278	-93.13892222	3	N	MAH00014	2017	6	7	10	49.64861111	-52.25	2.322916667
Carleton	488948.76	4923159.06	44.46165278	-93.13892222	3	P	MAH00014	2017	6	7	10	53.46805556	159	1.697916667
Carleton	488948.76	4923159.06	44.46165278	-93.13892222	3	N	MAH00014	2017	6	7	10	53.74722222	134	0.864583333
Carleton	488948.76	4923159.06	44.46165278	-93.13892222	3	P	MAH00014	2017	6	7	10	54.79583333	38	0.6875
Carleton	488948.76	4923159.06	44.46165278	-93.13892222	3	N	MAH00014	2017	6	7	11	0.3875	37.5	1.302083333
Carleton	488948.76	4923159.06	44.46165278	-93.13892222	3	N	MAH00014	2017	6	7	11	10.82986111	147	0.697916667
Carleton	488948.76	4923159.06	44.46165278	-93.13892222	1	N	MAH00016	2017	6	8	13	21.44652778	-32.5	0.90625
Carleton	488948.76	4923159.06	44.46165278	-93.13892222	1	P	MAH00016	2017	6	8	13	22.36666667	-19.25	0.854166667
Carleton	488948.76	4923159.06	44.46165278	-93.13892222	1	N	MAH00016	2017	6	8	13	22.56944444	-40.5	0.5
Carleton	488948.76	4923159.06	44.46165278	-93.13892222	1	N	MAH00016	2017	6	8	13	24.01388889	189.75	0.802083333
Carleton	488948.76	4923159.06	44.46165278	-93.13892222	1	N	MAH00016	2017	6	8	13	24.8125	64	0.75
Carleton	488948.76	4923159.06	44.46165278	-93.13892222	1	N	MAH00016	2017	6	8	13	25.60277778	186	0.802083333
Carleton	488948.76	4923159.06	44.46165278	-93.13892222	1	N	MAH00016	2017	6	8	13	25.98541667	180.5	0.8125
Carleton	488948.76	4923159.06	44.46165278	-93.13892222	1	N	MAH00016	2017	6	8	13	28.1125	21.5	0.802083333
Carleton	488948.76	4923159.06	44.46165278	-93.13892222	1	N	MAH00016	2017	6	8	13	28.98472222	159	0.729166667
Carleton	488948.76	4923159.06	44.46165278	-93.13892222	1	N	MAH00016	2017	6	8	13	29.33541667	185.25	0.739583333
Carleton	488948.76	4923159.06	44.46165278	-93.13892222	1	P	MAH00016	2017	6	8	13	31.35763889	72.5	1.197916667
Carleton	488948.76	4923159.06	44.46165278	-93.13892222	1	N	MAH00016	2017	6	8	13	34.97222222	135	1.1875
Carleton	488948.76	4923159.06	44.46165278	-93.13892222	1	P	MAH00016	2017	6	8	13	44.61527778	38.5	1.09375
Carleton	488948.76	4923159.06	44.46165278	-93.13892222	1	P	MAH00016	2017	6	8	13	46.68125	-36	0.885416667
Carleton	488948.76	4923159.06	44.46165278	-93.13892222	1	P	MAH00016	2017	6	8	13	47.29027778	-41.25	0.791666667
Carleton	488948.76	4923159.06	44.46165278	-93.13892222	1	P	MAH00016	2017	6	8	13	49.93472222	-31.5	0.947916667
Carleton	488948.76	4923159.06	44.46165278	-93.13892222	1	P	MAH00016	2017	6	8	13	53.36180556	-80.75	1.083333333
Carleton	488948.76	4923159.06	44.46165278	-93.13892222	1	P	MAH00016	2017	6	8	13	56.26944444	154.25	0.729166667
Carleton	488948.76	4923159.06	44.46165278	-93.13892222	1	P	MAH00016	2017	6	8	14	1.998611111	144.25	0.75
Carleton	488948.76	4923159.06	44.46165278	-93.13892222	1	P	MAH00016	2017	6	8	14	16.34166667	155.75	0.802083333
Carleton	488948.76	4923159.06	44.46165278	-93.13892222	2	P	MAH00018	2017	6	8	15	11.21180556	73	1.0625
Carleton	488948.76	4923159.06	44.46165278	-93.13892222	2	N	MAH00018	2017	6	8	15	12.52083333	83.25	1.03125
Carleton	488948.76	4923159.06	44.46165278	-93.13892222	2	P	MAH00018	2017	6	8	15	13.15972222	72.5	1.104166667
Carleton	488948.76	4923159.06	44.46165278	-93.13892222	2	P	MAH00018	2017	6	8	15	14.31527778	-127.75	1.395833333
Carleton	488948.76	4923159.06	44.46165278	-93.13892222	2	N	MAH00018	2017	6	8	15	14.66319444	63.75	1.302083333
Carleton	488948.76	4923159.06	44.46165278	-93.13892222	2	P	MAH00018	2017	6	8	15	15.875	88	0.864583333
Carleton	488948.76	4923159.06	44.46165278	-93.13892222	2	N	MAH00018	2017	6	8	15	16.35833333	123.5	0.833333333
Carleton	488948.76	4923159.06	44.46165278	-93.13892222	2	P	MAH00018	2017	6	8	15	18.91597222	79.75	1.020833333
Carleton	488948.76	4923159.06	44.46165278	-93.13892222	2	P	MAH00018	2017	6	8	15	19.59305556	105.25	1.104166667
Carleton	488948.76	4923159.06	44.46165278	-93.13892222	2	P	MAH00018	2017	6	8	15	24.56527778	76.5	1.625
Carleton	488948.76	4923159.06	44.46165278	-93.13892222	2	P	MAH00018	2017	6	8	15	26.36388889	75.875	1.104166667
Carleton	488948.76	4923159.06	44.46165278	-93.13892222	2	P	MAH00018	2017	6	8	15	28.05069444	72.5	1.135416667
Carleton	488948.76	4923159.06	44.46165278	-93.13892222	2	N	MAH00018	2017	6	8	15	28.40555556	62.5	1.010416667
Carleton	488948.76	4923159.06	44.46165278	-93.13892222	2	P	MAH00018	2017	6	8	15	30.66944444	55.75	1.083333333
Carleton	488948.76	4923159.06	44.46165278	-93.13892222	2	N	MAH00018	2017	6	8	15	34.49027778	-81.25	0.854166667
Carleton	488948.76	4923159.06	44.46165278	-93.13892222	2	N	MAH00018	2017	6	8	15	41.27847222	-26.75	1.177083333
Carleton	488948.76	4923159.06	44.46165278	-93.13892222	2	N	MAH00018	2017	6	8	15	43.07291667	103.75	1.447916667
Carleton	488948.76	4923159.06	44.46165278	-93.13892222	2	N	MAH00018	2017	6	8	15	43.64722222	99.75	1.322916667
Carleton	488948.76	4923159.06	44.46165278	-93.13892222	2	N	MAH00018	2017	6	8	15	47.98472222	30.25	0.489583333
Carleton	488948.76	4923159.06	44.46165278	-93.13892222	2	N	MAH00018	2017	6	8	15	56.35	-86.25	1.416666667
Carleton	488948.76	4923159.06	44.46165278	-93.13892222	3	P	MAH00017	2017	6	8	14	27.84305556	130.75	0.489583333
Carleton	488948.76	4923159.06	44.46165278	-93.13892222	3	N	MAH00017	2017	6	8	14	32.35902778	164.5	0.84375
Carleton	488948.76	4923159.06	44.46165278	-93.13892222	3	N	MAH00017	2017	6	8	14	34.24375	95	0.96875
Carleton	488948.76	4923159.06	44.46165278	-93.13892222	3	N	MAH00017	2017	6	8	14	34.42361111	81	1.177083333
Carleton	488948.76	4923159.06	44.46165278	-93.13892222	3	P	MAH00017	2017	6	8	14	35.22291667	105.5	1.0625
Carleton	488948.76	4923159.06	44.46165278	-93.13892222	3	N	MAH00017	2017	6	8	14	35.74236111	95	1.0625
Carleton	488948.76	4923159.06	44.46165278	-93.13892222	3	P	MAH00017	2017	6	8	14	38.67708333	119.25	0.875
Carleton	488948.76	4923159.06	44.46165278	-93.13892222	3	N	MAH00017	2017	6	8	14	48.32222222	89.5	1.427083333
Carleton	488948.76	4923159.06	44.46165278	-93.13892222	3	N	MAH00017	2017	6	8	14	50.66666667	14.75	0.947916667
Carleton	488948.76	4923159.06	44.46165278	-93.13892222	3	N	MAH00017	2017	6	8	14	53.18680556	-88.5	1.947916667
Carleton	488948.76	4923159.06	44.46165278	-93.13892222	3	N	MAH00017	2017	6	8	14	58.06805556	140.75	0.802083333
Carleton	488948.76	4923159.06	44.46165278	-93.13892222	3	N	MAH00017	2017	6	8	15	1.461111111	-124.5	3.864583333
Carleton	488948.76	4923159.06	44.46165278	-93.13892222	3	N	MAH00017	2017	6	8	15	3.810416667	-132	3.8125
Carleton	488948.76	4923159.06	44.46165278	-93.13892222	2	N	MAH00022	2017	6	13	14	20.36388889	100.75	1.177083333
Carleton	488948.76	4923159.06	44.46165278	-93.13892222	2	N	MAH00022	2017	6	13	14	22.01388889	-79	1.354166667
Carleton	488948.76	4923159.06	44.46165278	-93.13892222	2	N	MAH00022	2017	6	13	14	24.68819444	85.75	1.177083333
Carleton	488948.76	4923159.06	44.46165278	-93.13892222	2	P	MAH00022	2017	6	13	14	26.65347222	113.875	1.333333333
Carleton	488948.76	4923159.06	44.46165278	-93.13892222	2	N	MAH00022	2017	6	13	14	26.98888889	106.25	1.114583333
Carleton	488948.76	4923159.06	44.46165278	-93.13892222	2	P	MAH00022	2017	6	13	14	27.09305556	112	1.28125
Carleton	488948.76	4923159.06	44.46165278	-93.13892222	2	P	MAH00022	2017	6	13	14	27.6625	-122.5	1.291666667
Carleton	488948.76	4923159.06	44.46165278	-93.13892222	2	P	MAH00022	2017	6	13	14	30.075	152.25	0.59375
Carleton	488948.76	4923159.06	44.46165278	-93.13892222	2	N	MAH00022	2017	6	13	14	30.54027778	109.5	1.197916667
Carleton	488948.76	4923159.06	44.46165278	-93.13892222	2	N	MAH00022	2017	6	13	14	31.73472222	136.625	0.552083333
Carleton	488948.76	4923159.06	44.46165278	-93.13892222	2	N	MAH00022	2017	6	13	14	33.14791667	-86.5	1.291666667
Carleton	488948.76	4923159.06	44.46165278	-93.13892222	2	N	MAH00022	2017	6	13	14	35.69861111	110.25	1
Carleton	488948.76	4923159.06	44.46165278	-93.13892222	2	P	MAH00022	2017	6	13	14	36.91041667	105.75	1.302083333
Carleton	488948.76	4923159.06	44.46165278	-93.13892222	2	P	MAH00022	2017	6	13	14	42.48541667	109.5	0.78125
Carleton	488948.76	4923159.06	44.46165278	-93.13892222	2	P	MAH00022	2017	6	13	14	43.70833333	70.75	1.3125
Carleton	488948.76	4923159.06	44.46165278	-93.13892222	2	P	MAH00022	2017	6	13	14	44.34583333	98.75	0.84375
Carleton	488948.76	4923159.06	44.46165278	-93.13892222	2	N	MAH00022	2017	6	13	14	47.16041667	85	1.239583333
Carleton	488948.76	4923159.06	44.46165278	-93.13892222	2	N	MAH00022	2017	6	13	14	50.30416667	89.75	1.28125
Carleton	488948.76	4923159.06	44.46165278	-93.13892222	2	P	MAH00022	2017	6	13	14	56.68194444	87.25	1.166666667
Carleton	488948.76	4923159.06	44.46165278	-93.13892222	2	P	MAH00022	2017	6	13	15	4.149305556	122.625	0.489583333
Carleton	488948.76	4923159.06	44.46165278	-93.13892222	3	N	MAH00021	2017	6	13	13	27.1625	172.5	0.270833333
Carleton	488948.76	4923159.06	44.46165278	-93.13892222	3	N	MAH00021	2017	6	13	13	28.73055556	152.75	0.958333333
Carleton	488948.76	4923159.06	44.46165278	-93.13892222	3	N	MAH00021	2017	6	13	13	30.53333333	181	0.8125
Carleton	488948.76	4923159.06	44.46165278	-93.13892222	3	N	MAH00021	2017	6	13	13	31.12291667	136.125	1.166666667
Carleton	488948.76	4923159.06	44.46165278	-93.13892222	3	P	MAH00021	2017	6	13	13	31.73055556	175	1.541666667
Carleton	488948.76	4923159.06	44.46165278	-93.13892222	3	N	MAH00021	2017	6	13	13	35.31597222	134.25	1.166666667
Carleton	488948.76	4923159.06	44.46165278	-93.13892222	3	N	MAH00021	2017	6	13	13	39.62569444	170.75	0.770833333
Carleton	488948.76	4923159.06	44.46165278	-93.13892222	3	P	MAH00021	2017	6	13	13	45.39375	-49.25	3.197916667
Carleton	488948.76	4923159.06	44.46165278	-93.13892222	3	N	MAH00021	2017	6	13	13	47.13333333	116.125	0.322916667
Carleton	488948.76	4923159.06	44.46165278	-93.13892222	3	N	MAH00021	2017	6	13	13	48.80416667	181.75	0.979166667
Carleton	488948.76	4923159.06	44.46165278	-93.13892222	3	N	MAH00021	2017	6	13	13	49.72986111	-40.75	3.291666667
Carleton	488948.76	4923159.06	44.46165278	-93.13892222	3	P	MAH00021	2017	6	13	13	56.79375	121	0.96875
Carleton	488948.76	4923159.06	44.46165278	-93.13892222	3	P	MAH00021	2017	6	13	14	0.565277778	49.625	0.3125
Carleton	488948.76	4923159.06	44.46165278	-93.13892222	1	N	MAH00026	2017	6	16	11	31.86944444	-155.5	1.333333333
Carleton	488948.76	4923159.06	44.46165278	-93.13892222	1	P	MAH00026	2017	6	16	11	35.77916667	11	1.604166667
Carleton	488948.76	4923159.06	44.46165278	-93.13892222	1	P	MAH00026	2017	6	16	11	39.72777778	78.5	0.958333333
Carleton	488948.76	4923159.06	44.46165278	-93.13892222	2	N	MAH00025	2017	6	16	10	22.95	-21.75	1.166666667
Carleton	488948.76	4923159.06	44.46165278	-93.13892222	2	N	MAH00025	2017	6	16	10	24.17638889	83.625	2.052083333
Carleton	488948.76	4923159.06	44.46165278	-93.13892222	2	N	MAH00025	2017	6	16	10	26.20625	5.75	1.5625
Carleton	488948.76	4923159.06	44.46165278	-93.13892222	2	N	MAH00025	2017	6	16	10	30.45763889	60.5	1.833333333
Carleton	488948.76	4923159.06	44.46165278	-93.13892222	2	N	MAH00025	2017	6	16	10	31.9	-55	1.302083333
Carleton	488948.76	4923159.06	44.46165278	-93.13892222	2	N	MAH00025	2017	6	16	10	33.08611111	80.25	2.552083333
Carleton	488948.76	4923159.06	44.46165278	-93.13892222	2	N	MAH00025	2017	6	16	10	33.71111111	-75.75	1.46875
Carleton	488948.76	4923159.06	44.46165278	-93.13892222	2	N	MAH00025	2017	6	16	10	34.57291667	61.5	1.6875
Carleton	488948.76	4923159.06	44.46165278	-93.13892222	2	N	MAH00025	2017	6	16	10	36.68611111	-48.5	1.375
Carleton	488948.76	4923159.06	44.46165278	-93.13892222	2	N	MAH00025	2017	6	16	10	38.92638889	27	1.3125
Carleton	488948.76	4923159.06	44.46165278	-93.13892222	2	N	MAH00025	2017	6	16	10	46.55625	-65.25	1.1875
Carleton	488948.76	4923159.06	44.46165278	-93.13892222	3	P	MAH00027	2017	6	16	11	55.44861111	-112.75	2.8125
Carleton	488948.76	4923159.06	44.46165278	-93.13892222	3	N	MAH00027	2017	6	16	11	57.82638889	-105.25	4.520833333
Carleton	488948.76	4923159.06	44.46165278	-93.13892222	3	N	MAH00027	2017	6	16	11	58.2875	-90	5.520833333
Carleton	488948.76	4923159.06	44.46165278	-93.13892222	3	N	MAH00027	2017	6	16	12	0.752777778	-137.75	1.125
Carleton	488948.76	4923159.06	44.46165278	-93.13892222	3	P	MAH00027	2017	6	16	12	1.599305556	-89.5	1.489583333
Carleton	488948.76	4923159.06	44.46165278	-93.13892222	3	P	MAH00027	2017	6	16	12	3.06875	40.5	1.25
Carleton	488948.76	4923159.06	44.46165278	-93.13892222	3	P	MAH00027	2017	6	16	12	3.635416667	-88.25	1.229166667
Carleton	488948.76	4923159.06	44.46165278	-93.13892222	3	P	MAH00027	2017	6	16	12	5.602777778	-108	1.708333333
Carleton	488948.76	4923159.06	44.46165278	-93.13892222	3	N	MAH00027	2017	6	16	12	8.113888889	-104	4.416666667
Carleton	488948.76	4923159.06	44.46165278	-93.13892222	3	N	MAH00027	2017	6	16	12	9.492361111	-129.75	4.145833333
Carleton	488948.76	4923159.06	44.46165278	-93.13892222	3	N	MAH00027	2017	6	16	12	10.17013889	-89.5	2.15625
Carleton	488948.76	4923159.06	44.46165278	-93.13892222	3	N	MAH00027	2017	6	16	12	11.01180556	-135.5	1.083333333
Carleton	488948.76	4923159.06	44.46165278	-93.13892222	3	P	MAH00027	2017	6	16	12	12.12847222	-95.5	1.677083333
Carleton	488948.76	4923159.06	44.46165278	-93.13892222	3	P	MAH00027	2017	6	16	12	13.74097222	-105.5	1.135416667
Carleton	488948.76	4923159.06	44.46165278	-93.13892222	3	N	MAH00027	2017	6	16	12	15.90416667	-82.375	1.09375
Carleton	488948.76	4923159.06	44.46165278	-93.13892222	3	N	MAH00027	2017	6	16	12	23.38402778	17.5	1.197916667
Carleton	488948.76	4923159.06	44.46165278	-93.13892222	3	P	MAH00027	2017	6	16	12	24.40069444	-123.75	1.927083333
Carleton	488948.76	4923159.06	44.46165278	-93.13892222	3	P	MAH00027	2017	6	16	12	25.15694444	-108.5	1.604166667
Carleton	488948.76	4923159.06	44.46165278	-93.13892222	3	P	MAH00027	2017	6	16	12	25.38541667	-116.875	1.947916667
Carleton	488948.76	4923159.06	44.46165278	-93.13892222	3	N	MAH00027	2017	6	16	12	35.06388889	-141.75	2.34375
Carleton	488948.76	4923159.06	44.46165278	-93.13892222	1	P	MAH00030	2017	6	20	9	46.14930556	-92	0.770833333
Carleton	488948.76	4923159.06	44.46165278	-93.13892222	1	P	MAH00030	2017	6	20	9	55.73611111	127	1.708333333
Carleton	488948.76	4923159.06	44.46165278	-93.13892222	1	P	MAH00030	2017	6	20	9	56.75	-94	0.739583333
Carleton	488948.76	4923159.06	44.46165278	-93.13892222	1	N	MAH00030	2017	6	20	9	59.99097222	-113.75	1.625
Carleton	488948.76	4923159.06	44.46165278	-93.13892222	1	N	MAH00030	2017	6	20	10	2.169444444	-112.5	1.447916667
Carleton	488948.76	4923159.06	44.46165278	-93.13892222	1	N	MAH00030	2017	6	20	10	13.00555556	-91.75	0.885416667
Carleton	488948.76	4923159.06	44.46165278	-93.13892222	1	P	MAH00030	2017	6	20	10	13.35763889	-86.75	0.666666667
Carleton	488948.76	4923159.06	44.46165278	-93.13892222	1	P	MAH00030	2017	6	20	10	25.8	-89	0.59375
Carleton	488948.76	4923159.06	44.46165278	-93.13892222	1	P	MAH00030	2017	6	20	10	30.42291667	142	0.46875
Carleton	488948.76	4923159.06	44.46165278	-93.13892222	2	N	MAH00028	2017	6	20	8	18.01527778	24.75	1.197916667
Carleton	488948.76	4923159.06	44.46165278	-93.13892222	2	N	MAH00028	2017	6	20	8	24.18194444	20	0.822916667
Carleton	488948.76	4923159.06	44.46165278	-93.13892222	2	N	MAH00028	2017	6	20	9	4.646527778	9	1.302083333
Carleton	488948.76	4923159.06	44.46165278	-93.13892222	3	N	MAH00031	2017	6	20	10	38.89236111	-69	1.989583333
Carleton	488948.76	4923159.06	44.46165278	-93.13892222	3	N	MAH00031	2017	6	20	10	45.35138889	-151	0.5625
Carleton	488948.76	4923159.06	44.46165278	-93.13892222	3	P	MAH00031	2017	6	20	11	2.3	-103.25	2.177083333
Carleton	488948.76	4923159.06	44.46165278	-93.13892222	3	N	MAH00031	2017	6	20	11	5.232638889	50.75	1.239583333
Carleton	488948.76	4923159.06	44.46165278	-93.13892222	3	N	MAH00031	2017	6	20	11	6.972916667	-74.5	1.395833333
Carleton	488948.76	4923159.06	44.46165278	-93.13892222	3	P	MAH00031	2017	6	20	11	7.8	-116	2.135416667
Carleton	488948.76	4923159.06	44.46165278	-93.13892222	3	N	MAH00031	2017	6	20	11	11.3125	53.75	1.427083333
Carleton	488948.76	4923159.06	44.46165278	-93.13892222	3	P	MAH00031	2017	6	20	11	12.59027778	-98.25	1.854166667
Carleton	488948.76	4923159.06	44.46165278	-93.13892222	3	N	MAH00031	2017	6	20	11	16.95	53.25	1.833333333
Carleton	488948.76	4923159.06	44.46165278	-93.13892222	3	N	MAH00031	2017	6	20	11	25.55486111	40.75	1.583333333
Carleton	488948.76	4923159.06	44.46165278	-93.13892222	3	P	MAH00031	2017	6	20	11	28.92569444	-128.25	1.927083333
Carleton	488948.76	4923159.06	44.46165278	-93.13892222	1	P	MAH00032	2017	6	23	13	19.09305556	58.5	0.916666667
Carleton	488948.76	4923159.06	44.46165278	-93.13892222	1	N	MAH00032	2017	6	23	13	23.68194444	-28.75	0.791666667
Carleton	488948.76	4923159.06	44.46165278	-93.13892222	1	N	MAH00032	2017	6	23	13	24.16597222	-32.75	0.875
Carleton	488948.76	4923159.06	44.46165278	-93.13892222	1	P	MAH00032	2017	6	23	13	27.19027778	-13.5	0.979166667
Carleton	488948.76	4923159.06	44.46165278	-93.13892222	1	P	MAH00032	2017	6	23	13	30.46180556	-162.75	1.479166667
Carleton	488948.76	4923159.06	44.46165278	-93.13892222	1	P	MAH00032	2017	6	23	13	31.65	141	0.770833333
Carleton	488948.76	4923159.06	44.46165278	-93.13892222	1	P	MAH00032	2017	6	23	13	49.5125	29.5	0.729166667
Carleton	488948.76	4923159.06	44.46165278	-93.13892222	2	N	MAH00034	2017	6	23	15	22.17430556	-125	1.46875
Carleton	488948.76	4923159.06	44.46165278	-93.13892222	2	P	MAH00034	2017	6	23	15	23.04166667	130.5	0.854166667
Carleton	488948.76	4923159.06	44.46165278	-93.13892222	2	N	MAH00034	2017	6	23	15	25.68611111	122.5	0.833333333
Carleton	488948.76	4923159.06	44.46165278	-93.13892222	2	P	MAH00034	2017	6	23	15	26.26597222	-14.875	1.28125
Carleton	488948.76	4923159.06	44.46165278	-93.13892222	2	N	MAH00034	2017	6	23	15	28.24236111	95.75	1.197916667
Carleton	488948.76	4923159.06	44.46165278	-93.13892222	2	P	MAH00034	2017	6	23	15	29.51805556	113.5	0.78125
Carleton	488948.76	4923159.06	44.46165278	-93.13892222	2	P	MAH00034	2017	6	23	15	29.89722222	132.75	0.333333333
Carleton	488948.76	4923159.06	44.46165278	-93.13892222	2	P	MAH00034	2017	6	23	15	31.92777778	132.75	0.770833333
Carleton	488948.76	4923159.06	44.46165278	-93.13892222	2	P	MAH00034	2017	6	23	15	32.71388889	125.5	0.791666667
Carleton	488948.76	4923159.06	44.46165278	-93.13892222	2	N	MAH00034	2017	6	23	15	40.325	120	3.708333333
Carleton	488948.76	4923159.06	44.46165278	-93.13892222	2	P	MAH00034	2017	6	23	15	41.72986111	110	1
Carleton	488948.76	4923159.06	44.46165278	-93.13892222	2	P	MAH00034	2017	6	23	15	44.41180556	82.75	1.010416667
Carleton	488948.76	4923159.06	44.46165278	-93.13892222	2	P	MAH00034	2017	6	23	15	45.99513889	84.25	0.90625
Carleton	488948.76	4923159.06	44.46165278	-93.13892222	2	P	MAH00034	2017	6	23	15	50.49236111	0.25	1.6875
Carleton	488948.76	4923159.06	44.46165278	-93.13892222	2	N	MAH00034	2017	6	23	15	56.37638889	-91.5	1.4375
Carleton	488948.76	4923159.06	44.46165278	-93.13892222	2	P	MAH00034	2017	6	23	15	59.33958333	115.75	0.583333333
Carleton	488948.76	4923159.06	44.46165278	-93.13892222	2	N	MAH00034	2017	6	23	16	2.570138889	-138.25	0.90625
Carleton	488948.76	4923159.06	44.46165278	-93.13892222	3	N	MAH00033	2017	6	23	14	15.03263889	-189	1.3125
Carleton	488948.76	4923159.06	44.46165278	-93.13892222	3	N	MAH00033	2017	6	23	14	19.15972222	-52.5	1.197916667
Carleton	488948.76	4923159.06	44.46165278	-93.13892222	3	N	MAH00033	2017	6	23	14	25.30486111	-44.875	1.854166667
Carleton	488948.76	4923159.06	44.46165278	-93.13892222	3	P	MAH00033	2017	6	23	14	27.50416667	139.75	1.5625
Carleton	488948.76	4923159.06	44.46165278	-93.13892222	3	N	MAH00033	2017	6	23	14	31.09375	-45.75	1.729166667
Carleton	488948.76	4923159.06	44.46165278	-93.13892222	3	N	MAH00033	2017	6	23	14	32.18333333	160.25	0.822916667
Carleton	488948.76	4923159.06	44.46165278	-93.13892222	3	N	MAH00033	2017	6	23	14	34.06319444	43.25	0.489583333
Carleton	488948.76	4923159.06	44.46165278	-93.13892222	3	N	MAH00033	2017	6	23	14	41.92222222	10.25	1.3125
Carleton	488948.76	4923159.06	44.46165278	-93.13892222	3	P	MAH00033	2017	6	23	14	44.36875	135	2.125
Carleton	488948.76	4923159.06	44.46165278	-93.13892222	3	N	MAH00033	2017	6	23	14	45.84583333	23.25	0.739583333
Carleton	488948.76	4923159.06	44.46165278	-93.13892222	3	P	MAH00033	2017	6	23	14	56.45625	9.75	0.802083333
Carleton	488948.76	4923159.06	44.46165278	-93.13892222	3	P	MAH00033	2017	6	23	14	58.0125	-36	1.885416667
Carleton	488948.76	4923159.06	44.46165278	-93.13892222	3	N	MAH00033	2017	6	23	14	59.33541667	152	0.947916667
Carleton	488948.76	4923159.06	44.46165278	-93.13892222	1	N	MAH00036	2017	6	27	13	54.58819444	-76.5	1.208333333
Carleton	488948.76	4923159.06	44.46165278	-93.13892222	1	P	MAH00036	2017	6	27	13	57.08819444	-174	1.895833333
Carleton	488948.76	4923159.06	44.46165278	-93.13892222	1	P	MAH00036	2017	6	27	13	57.80694444	-47	0.40625
Carleton	488948.76	4923159.06	44.46165278	-93.13892222	1	P	MAH00036	2017	6	27	13	59.10625	104.5	0.697916667
Carleton	488948.76	4923159.06	44.46165278	-93.13892222	1	P	MAH00036	2017	6	27	14	2.285416667	-34.75	0.625
Carleton	488948.76	4923159.06	44.46165278	-93.13892222	1	P	MAH00036	2017	6	27	14	3.141666667	156.75	1.885416667
Carleton	488948.76	4923159.06	44.46165278	-93.13892222	1	N	MAH00036	2017	6	27	14	3.577083333	156	1.614583333
Carleton	488948.76	4923159.06	44.46165278	-93.13892222	1	N	MAH00036	2017	6	27	14	6.073611111	148.75	1.15625
Carleton	488948.76	4923159.06	44.46165278	-93.13892222	1	N	MAH00036	2017	6	27	14	8.372916667	-159	1.375
Carleton	488948.76	4923159.06	44.46165278	-93.13892222	1	P	MAH00036	2017	6	27	14	10.7625	-153.5	2.239583333
Carleton	488948.76	4923159.06	44.46165278	-93.13892222	1	P	MAH00036	2017	6	27	14	12.63333333	-83.75	1.125
Carleton	488948.76	4923159.06	44.46165278	-93.13892222	1	N	MAH00036	2017	6	27	14	13.12638889	153.25	2.34375
Carleton	488948.76	4923159.06	44.46165278	-93.13892222	1	P	MAH00036	2017	6	27	14	16.62083333	185.75	1.770833333
Carleton	488948.76	4923159.06	44.46165278	-93.13892222	1	N	MAH00036	2017	6	27	14	17.05972222	-161.25	2.09375
Carleton	488948.76	4923159.06	44.46165278	-93.13892222	1	N	MAH00036	2017	6	27	14	21.3	155	1.083333333
Carleton	488948.76	4923159.06	44.46165278	-93.13892222	1	N	MAH00036	2017	6	27	14	22.25972222	-50.5	0.510416667
Carleton	488948.76	4923159.06	44.46165278	-93.13892222	1	N	MAH00036	2017	6	27	14	24.14583333	-174	1.760416667
Carleton	488948.76	4923159.06	44.46165278	-93.13892222	1	N	MAH00036	2017	6	27	14	26.78333333	-57.125	1.385416667
Carleton	488948.76	4923159.06	44.46165278	-93.13892222	1	P	MAH00036	2017	6	27	14	27.95416667	152.375	1.6875
Carleton	488948.76	4923159.06	44.46165278	-93.13892222	1	P	MAH00036	2017	6	27	14	32.56319444	147.375	0.614583333
Carleton	488948.76	4923159.06	44.46165278	-93.13892222	2	N	MAH00035	2017	6	27	13	0.340972222	-47	1.5
Carleton	488948.76	4923159.06	44.46165278	-93.13892222	2	P	MAH00035	2017	6	27	13	0.649305556	-160	1.96875
Carleton	488948.76	4923159.06	44.46165278	-93.13892222	2	N	MAH00035	2017	6	27	13	1.272916667	-95.25	1.875
Carleton	488948.76	4923159.06	44.46165278	-93.13892222	2	N	MAH00035	2017	6	27	13	2.003472222	76.75	0.541666667
Carleton	488948.76	4923159.06	44.46165278	-93.13892222	2	P	MAH00035	2017	6	27	13	2.174305556	-161.75	1.854166667
Carleton	488948.76	4923159.06	44.46165278	-93.13892222	2	N	MAH00035	2017	6	27	13	2.483333333	-72.75	1.28125
Carleton	488948.76	4923159.06	44.46165278	-93.13892222	2	N	MAH00035	2017	6	27	13	3.461111111	58	0.364583333
Carleton	488948.76	4923159.06	44.46165278	-93.13892222	2	P	MAH00035	2017	6	27	13	5.730555556	-137.75	3.291666667
Carleton	488948.76	4923159.06	44.46165278	-93.13892222	2	N	MAH00035	2017	6	27	13	6.164583333	144	0.927083333
Carleton	488948.76	4923159.06	44.46165278	-93.13892222	2	P	MAH00035	2017	6	27	13	6.334722222	-170.25	1.677083333
Carleton	488948.76	4923159.06	44.46165278	-93.13892222	2	N	MAH00035	2017	6	27	13	7.402777778	49.25	0.552083333
Carleton	488948.76	4923159.06	44.46165278	-93.13892222	2	N	MAH00035	2017	6	27	13	14.11875	47.75	1.625
Carleton	488948.76	4923159.06	44.46165278	-93.13892222	2	P	MAH00035	2017	6	27	13	16.36597222	-148.5	0.447916667
Carleton	488948.76	4923159.06	44.46165278	-93.13892222	2	N	MAH00035	2017	6	27	13	17.80694444	-92	1.1875
Carleton	488948.76	4923159.06	44.46165278	-93.13892222	2	P	MAH00035	2017	6	27	13	19.09236111	-160.25	1.864583333
Carleton	488948.76	4923159.06	44.46165278	-93.13892222	2	N	MAH00035	2017	6	27	13	19.85833333	-44.5	0.354166667
Carleton	488948.76	4923159.06	44.46165278	-93.13892222	2	P	MAH00035	2017	6	27	13	25.17777778	-174.25	1.84375
Carleton	488948.76	4923159.06	44.46165278	-93.13892222	2	P	MAH00035	2017	6	27	13	33.69236111	-168.25	2.0625
Carleton	488948.76	4923159.06	44.46165278	-93.13892222	2	P	MAH00035	2017	6	27	13	40.80833333	-29	0.833333333
Carleton	488948.76	4923159.06	44.46165278	-93.13892222	2	P	MAH00035	2017	6	27	13	42.73194444	-178.75	1.71875
Carleton	488948.76	4923159.06	44.46165278	-93.13892222	3	N	MAH00037	2017	6	27	14	46.69305556	30.375	0.78125
Carleton	488948.76	4923159.06	44.46165278	-93.13892222	3	N	MAH00037	2017	6	27	14	47.30069444	-86.25	0.71875
Carleton	488948.76	4923159.06	44.46165278	-93.13892222	3	N	MAH00037	2017	6	27	14	48.12916667	-24.75	1.833333333
Carleton	488948.76	4923159.06	44.46165278	-93.13892222	3	P	MAH00037	2017	6	27	14	50.51527778	-50.25	0.78125
Carleton	488948.76	4923159.06	44.46165278	-93.13892222	3	N	MAH00037	2017	6	27	14	55.86944444	-58.5	0.708333333
Carleton	488948.76	4923159.06	44.46165278	-93.13892222	3	N	MAH00037	2017	6	27	14	58.58680556	-67.625	1.0625
Carleton	488948.76	4923159.06	44.46165278	-93.13892222	3	N	MAH00037	2017	6	27	14	59.91458333	20	1.260416667
Carleton	488948.76	4923159.06	44.46165278	-93.13892222	3	N	MAH00037	2017	6	27	15	7.681944444	-68	0.697916667
Carleton	488948.76	4923159.06	44.46165278	-93.13892222	3	N	MAH00037	2017	6	27	15	9.184027778	-91.5	0.59375
Carleton	488948.76	4923159.06	44.46165278	-93.13892222	3	N	MAH00037	2017	6	27	15	10.36666667	-148.25	1.614583333
Carleton	488948.76	4923159.06	44.46165278	-93.13892222	3	N	MAH00037	2017	6	27	15	17.24930556	-88.5	0.583333333
Carleton	488948.76	4923159.06	44.46165278	-93.13892222	1	P	MAH00020	2017	7	10	14	31.88680556	115.25	0.854166667
Carleton	488948.76	4923159.06	44.46165278	-93.13892222	1	P	MAH00020	2017	7	10	14	33.37152778	134.5	0.71875
Carleton	488948.76	4923159.06	44.46165278	-93.13892222	1	N	MAH00020	2017	7	10	14	36.92708333	107.5	0.916666667
Carleton	488948.76	4923159.06	44.46165278	-93.13892222	1	N	MAH00020	2017	7	10	14	49.85277778	82.75	4.427083333
Carleton	488948.76	4923159.06	44.46165278	-93.13892222	1	P	MAH00020	2017	7	10	14	52.78472222	141.75	0.822916667
Carleton	488948.76	4923159.06	44.46165278	-93.13892222	1	N	MAH00020	2017	7	10	14	54.23402778	153.75	1.239583333
Carleton	488948.76	4923159.06	44.46165278	-93.13892222	1	N	MAH00020	2017	7	10	15	0.417361111	142	0.65625
Carleton	488948.76	4923159.06	44.46165278	-93.13892222	1	N	MAH00020	2017	7	10	15	6.908333333	-111.25	4.864583333
Carleton	488948.76	4923159.06	44.46165278	-93.13892222	2	P	MAH00021	2017	7	10	15	20.48680556	27.75	1.083333333
Carleton	488948.76	4923159.06	44.46165278	-93.13892222	2	N	MAH00021	2017	7	10	15	21.04305556	-82.25	1.864583333
Carleton	488948.76	4923159.06	44.46165278	-93.13892222	2	P	MAH00021	2017	7	10	15	21.40277778	-39.5	1.333333333
Carleton	488948.76	4923159.06	44.46165278	-93.13892222	2	P	MAH00021	2017	7	10	15	22.26319444	-13	0.9375
Carleton	488948.76	4923159.06	44.46165278	-93.13892222	2	N	MAH00021	2017	7	10	15	22.99444444	-46	1.114583333
Carleton	488948.76	4923159.06	44.46165278	-93.13892222	2	P	MAH00021	2017	7	10	15	23.48055556	-17.5	1.197916667
Carleton	488948.76	4923159.06	44.46165278	-93.13892222	2	P	MAH00021	2017	7	10	15	24.25763889	-127.75	0.979166667
Carleton	488948.76	4923159.06	44.46165278	-93.13892222	2	N	MAH00021	2017	7	10	15	24.36111111	-101.75	1.895833333
Carleton	488948.76	4923159.06	44.46165278	-93.13892222	2	P	MAH00021	2017	7	10	15	26.45208333	-54.5	1.114583333
Carleton	488948.76	4923159.06	44.46165278	-93.13892222	2	P	MAH00021	2017	7	10	15	26.65	-132.25	1
Carleton	488948.76	4923159.06	44.46165278	-93.13892222	2	N	MAH00021	2017	7	10	15	28.14513889	-18.5	0.916666667
Carleton	488948.76	4923159.06	44.46165278	-93.13892222	2	N	MAH00021	2017	7	10	15	28.54861111	-142.5	0.84375
Carleton	488948.76	4923159.06	44.46165278	-93.13892222	2	N	MAH00021	2017	7	10	15	29.61180556	-74.5	0.59375
Carleton	488948.76	4923159.06	44.46165278	-93.13892222	2	N	MAH00021	2017	7	10	15	29.77708333	-75	1.34375
Carleton	488948.76	4923159.06	44.46165278	-93.13892222	2	P	MAH00021	2017	7	10	15	30.50555556	-27.25	1.010416667
Carleton	488948.76	4923159.06	44.46165278	-93.13892222	2	N	MAH00021	2017	7	10	15	30.63263889	-72.25	0.666666667
Carleton	488948.76	4923159.06	44.46165278	-93.13892222	2	N	MAH00021	2017	7	10	15	40.79861111	-106	1.229166667
Carleton	488948.76	4923159.06	44.46165278	-93.13892222	2	N	MAH00021	2017	7	10	15	41.86458333	-105.5	1.427083333
Carleton	488948.76	4923159.06	44.46165278	-93.13892222	2	P	MAH00021	2017	7	10	15	42.47847222	-17.5	1.197916667
Carleton	488948.76	4923159.06	44.46165278	-93.13892222	2	P	MAH00021	2017	7	10	15	50.31180556	-31.75	1.041666667
Carleton	488948.76	4923159.06	44.46165278	-93.13892222	3	N	MAH00019	2017	7	10	13	9.165972222	-20.5	4.90625
Carleton	488948.76	4923159.06	44.46165278	-93.13892222	3	P	MAH00019	2017	7	10	13	9.509027778	-41.25	0.625
Carleton	488948.76	4923159.06	44.46165278	-93.13892222	3	P	MAH00019	2017	7	10	13	11.20833333	38.25	1.15625
Carleton	488948.76	4923159.06	44.46165278	-93.13892222	3	N	MAH00019	2017	7	10	13	12.23888889	65.25	1.354166667
Carleton	488948.76	4923159.06	44.46165278	-93.13892222	3	N	MAH00019	2017	7	10	13	17.11111111	-92.5	1.625
Carleton	488948.76	4923159.06	44.46165278	-93.13892222	3	N	MAH00019	2017	7	10	13	17.45347222	-87.75	1.677083333
Carleton	488948.76	4923159.06	44.46165278	-93.13892222	3	N	MAH00019	2017	7	10	13	22.72152778	-90.75	1.791666667
Carleton	488948.76	4923159.06	44.46165278	-93.13892222	3	N	MAH00019	2017	7	10	13	24.26527778	-88.75	1.666666667
Carleton	488948.76	4923159.06	44.46165278	-93.13892222	3	N	MAH00019	2017	7	10	13	29.33958333	-7.25	0.947916667
Carleton	488948.76	4923159.06	44.46165278	-93.13892222	3	N	MAH00019	2017	7	10	13	30.19097222	158.75	1.135416667
Carleton	488948.76	4923159.06	44.46165278	-93.13892222	3	N	MAH00019	2017	7	10	13	30.77083333	-19.25	0.864583333
Carleton	488948.76	4923159.06	44.46165278	-93.13892222	3	N	MAH00019	2017	7	10	13	32.5125	34.5	1.0625
Carleton	488948.76	4923159.06	44.46165278	-93.13892222	3	P	MAH00019	2017	7	10	13	35.43125	43.75	0.46875
Carleton	488948.76	4923159.06	44.46165278	-93.13892222	3	P	MAH00019	2017	7	10	13	36.72222222	16.25	1.333333333
Carleton	488948.76	4923159.06	44.46165278	-93.13892222	3	P	MAH00019	2017	7	10	13	42.30625	14.25	1.166666667
Carleton	488948.76	4923159.06	44.46165278	-93.13892222	3	P	MAH00019	2017	7	10	13	51.78125	168.75	1
Carleton	488948.76	4923159.06	44.46165278	-93.13892222	3	P	MAH00019	2017	7	10	13	56.58333333	-32.75	0.34375
Carleton	488948.76	4923159.06	44.46165278	-93.13892222	1	P	MAH00019	2017	7	17	10	0.250694444	-99.25	1.15625
Carleton	488948.76	4923159.06	44.46165278	-93.13892222	1	N	MAH00019	2017	7	17	10	2.65	-188.25	0.4375
Carleton	488948.76	4923159.06	44.46165278	-93.13892222	1	P	MAH00019	2017	7	17	10	3.18125	-139.25	1.072916667
Carleton	488948.76	4923159.06	44.46165278	-93.13892222	1	N	MAH00019	2017	7	17	10	4.046527778	55.25	0.40625
Carleton	488948.76	4923159.06	44.46165278	-93.13892222	1	N	MAH00019	2017	7	17	10	5.275	-174.5	0.53125
Carleton	488948.76	4923159.06	44.46165278	-93.13892222	1	P	MAH00019	2017	7	17	10	7.665277778	-126	1.28125
Carleton	488948.76	4923159.06	44.46165278	-93.13892222	1	N	MAH00019	2017	7	17	10	9.470138889	106.75	0.4375
Carleton	488948.76	4923159.06	44.46165278	-93.13892222	1	P	MAH00019	2017	7	17	10	10.26666667	-111.25	0.75
Carleton	488948.76	4923159.06	44.46165278	-93.13892222	1	P	MAH00019	2017	7	17	10	12.28541667	-109.5	1.322916667
Carleton	488948.76	4923159.06	44.46165278	-93.13892222	1	N	MAH00019	2017	7	17	10	18.4125	40	0.5
Carleton	488948.76	4923159.06	44.46165278	-93.13892222	1	P	MAH00019	2017	7	17	10	18.71319444	-105	0.927083333
Carleton	488948.76	4923159.06	44.46165278	-93.13892222	1	N	MAH00041	2017	7	17	9	29.36388889	65	0.479166667
Carleton	488948.76	4923159.06	44.46165278	-93.13892222	1	N	MAH00041	2017	7	17	9	34.06180556	-20	1.604166667
Carleton	488948.76	4923159.06	44.46165278	-93.13892222	1	N	MAH00041	2017	7	17	9	35.62916667	102.75	0.520833333
Carleton	488948.76	4923159.06	44.46165278	-93.13892222	1	N	MAH00041	2017	7	17	9	36.43402778	93.25	0.375
Carleton	488948.76	4923159.06	44.46165278	-93.13892222	1	N	MAH00041	2017	7	17	9	41.84583333	56.5	0.4375
Carleton	488948.76	4923159.06	44.46165278	-93.13892222	2	P	MAH00020	2017	7	17	10	24.30138889	-100.5	1.125
Carleton	488948.76	4923159.06	44.46165278	-93.13892222	2	N	MAH00020	2017	7	17	10	25.35694444	144.5	0.604166667
Carleton	488948.76	4923159.06	44.46165278	-93.13892222	2	N	MAH00020	2017	7	17	10	27.17083333	64	0.28125
Carleton	488948.76	4923159.06	44.46165278	-93.13892222	2	P	MAH00020	2017	7	17	10	29.13611111	57.125	1.0625
Carleton	488948.76	4923159.06	44.46165278	-93.13892222	2	N	MAH00020	2017	7	17	10	31.28958333	50	0.3125
Carleton	488948.76	4923159.06	44.46165278	-93.13892222	2	N	MAH00020	2017	7	17	10	31.85972222	150.25	1.166666667
Carleton	488948.76	4923159.06	44.46165278	-93.13892222	2	N	MAH00020	2017	7	17	10	32.00347222	69	1.458333333
Carleton	488948.76	4923159.06	44.46165278	-93.13892222	2	P	MAH00020	2017	7	17	10	32.61875	-99.75	1.052083333
Carleton	488948.76	4923159.06	44.46165278	-93.13892222	2	N	MAH00020	2017	7	17	10	33.40763889	142.5	0.489583333
Carleton	488948.76	4923159.06	44.46165278	-93.13892222	2	N	MAH00020	2017	7	17	10	33.69791667	-11.75	1.302083333
Carleton	488948.76	4923159.06	44.46165278	-93.13892222	2	N	MAH00020	2017	7	17	10	35.42847222	-159.5	0.71875
Carleton	488948.76	4923159.06	44.46165278	-93.13892222	2	P	MAH00020	2017	7	17	10	43.82430556	-124	1.59375
Carleton	488948.76	4923159.06	44.46165278	-93.13892222	2	P	MAH00020	2017	7	17	10	44.81666667	-116.75	1.166666667
Carleton	488948.76	4923159.06	44.46165278	-93.13892222	2	N	MAH00020	2017	7	17	10	45.65069444	43.25	0.489583333
Carleton	488948.76	4923159.06	44.46165278	-93.13892222	2	N	MAH00020	2017	7	17	10	47.04722222	40	0.489583333
Carleton	488948.76	4923159.06	44.46165278	-93.13892222	2	P	MAH00020	2017	7	17	10	48.72847222	104	1.177083333
Carleton	488948.76	4923159.06	44.46165278	-93.13892222	2	P	MAH00020	2017	7	17	10	52.36736111	49.25	0.385416667
Carleton	488948.76	4923159.06	44.46165278	-93.13892222	2	P	MAH00020	2017	7	17	10	56.08402778	-129.25	0.697916667
Carleton	488948.76	4923159.06	44.46165278	-93.13892222	2	P	MAH00020	2017	7	17	10	58.56944444	-148.75	0.635416667
Carleton	488948.76	4923159.06	44.46165278	-93.13892222	2	P	MAH00020	2017	7	17	10	59.64027778	-145	1.21875
Carleton	488948.76	4923159.06	44.46165278	-93.13892222	1	N	MAH00043	2017	7	20	14	1.94375	150.75	1.114583333
Carleton	488948.76	4923159.06	44.46165278	-93.13892222	1	P	MAH00043	2017	7	20	14	6.706944444	117	1.15625
Carleton	488948.76	4923159.06	44.46165278	-93.13892222	1	N	MAH00043	2017	7	20	14	16.75486111	148.5	0.302083333
Carleton	488948.76	4923159.06	44.46165278	-93.13892222	1	P	MAH00043	2017	7	20	14	24.83680556	138.25	0.75
Carleton	488948.76	4923159.06	44.46165278	-93.13892222	1	P	MAH00043	2017	7	20	14	28.05416667	37.5	0.364583333
Carleton	488948.76	4923159.06	44.46165278	-93.13892222	1	P	MAH00043	2017	7	20	14	30.42847222	49.5	0.447916667
Carleton	488948.76	4923159.06	44.46165278	-93.13892222	1	N	MAH00043	2017	7	20	14	31.57222222	120	0.90625
Carleton	488948.76	4923159.06	44.46165278	-93.13892222	1	P	MAH00043	2017	7	20	14	34.57430556	142.25	0.791666667
Carleton	488948.76	4923159.06	44.46165278	-93.13892222	2	N	MAH00042	2017	7	20	13	8.549305556	152.75	0.3125
Carleton	488948.76	4923159.06	44.46165278	-93.13892222	2	N	MAH00042	2017	7	20	13	10.87291667	34.75	0.21875
Carleton	488948.76	4923159.06	44.46165278	-93.13892222	2	N	MAH00042	2017	7	20	13	11.83888889	46	1.3125
Carleton	488948.76	4923159.06	44.46165278	-93.13892222	2	N	MAH00042	2017	7	20	13	13.32222222	59.5	0.875
Carleton	488948.76	4923159.06	44.46165278	-93.13892222	2	N	MAH00042	2017	7	20	13	13.75	-133.75	1.270833333
Carleton	488948.76	4923159.06	44.46165278	-93.13892222	2	N	MAH00042	2017	7	20	13	15.68263889	72.5	1.041666667
Carleton	488948.76	4923159.06	44.46165278	-93.13892222	2	N	MAH00042	2017	7	20	13	26.73888889	125	0.364583333
Carleton	488948.76	4923159.06	44.46165278	-93.13892222	2	P	MAH00042	2017	7	20	13	30.20972222	-88.25	1.197916667
Carleton	488948.76	4923159.06	44.46165278	-93.13892222	2	N	MAH00042	2017	7	20	13	32.00277778	36.75	1.135416667
Carleton	488948.76	4923159.06	44.46165278	-93.13892222	2	P	MAH00042	2017	7	20	13	44.34930556	142.25	0.302083333
Carleton	488948.76	4923159.06	44.46165278	-93.13892222	2	P	MAH00042	2017	7	20	13	49.72361111	-44.5	1.354166667
Carleton	488948.76	4923159.06	44.46165278	-93.13892222	2	N	MAH00042	2017	7	20	13	54.19236111	170.25	0.979166667
Carleton	488948.76	4923159.06	44.46165278	-93.13892222	2	N	MAH00042	2017	7	20	13	56.00833333	-39	1.09375
Carleton	488948.76	4923159.06	44.46165278	-93.13892222	1	P	MAH00047A	2017	7	24	15	11.34722222	152.75	0.552083333
Carleton	488948.76	4923159.06	44.46165278	-93.13892222	1	N	MAH00047A	2017	7	24	15	12.02777778	-44.75	0.375
Carleton	488948.76	4923159.06	44.46165278	-93.13892222	1	N	MAH00047A	2017	7	24	15	17.94236111	80.5	0.59375
Carleton	488948.76	4923159.06	44.46165278	-93.13892222	1	P	MAH00047A	2017	7	24	15	19.14305556	153	0.760416667
Carleton	488948.76	4923159.06	44.46165278	-93.13892222	1	N	MAH00047A	2017	7	24	15	21.86111111	-96.75	0.53125
Carleton	488948.76	4923159.06	44.46165278	-93.13892222	1	N	MAH00047A	2017	7	24	15	27.58680556	99.25	1.270833333
Carleton	488948.76	4923159.06	44.46165278	-93.13892222	1	N	MAH00047A	2017	7	24	15	39.08888889	128.25	0.864583333
Carleton	488948.76	4923159.06	44.46165278	-93.13892222	1	N	MAH00047A	2017	7	24	15	40.08055556	139.25	0.5
Carleton	488948.76	4923159.06	44.46165278	-93.13892222	1	P	MAH00047A	2017	7	24	15	42.85416667	154	0.65625
Carleton	488948.76	4923159.06	44.46165278	-93.13892222	2	P	MAH00045A	2017	7	24	13	20.96388889	146.25	0.364583333
Carleton	488948.76	4923159.06	44.46165278	-93.13892222	2	N	MAH00045A	2017	7	24	13	24.35277778	126.25	0.28125
Carleton	488948.76	4923159.06	44.46165278	-93.13892222	2	N	MAH00045A	2017	7	24	13	25.42569444	43.5	1.03125
Carleton	488948.76	4923159.06	44.46165278	-93.13892222	2	P	MAH00045A	2017	7	24	13	26.72152778	-54	1.333333333
Carleton	488948.76	4923159.06	44.46165278	-93.13892222	2	P	MAH00045A	2017	7	24	13	29.14652778	-27.25	1.71875
Carleton	488948.76	4923159.06	44.46165278	-93.13892222	2	N	MAH00045A	2017	7	24	13	29.82013889	88.5	0.979166667
Carleton	488948.76	4923159.06	44.46165278	-93.13892222	2	P	MAH00045A	2017	7	24	13	30.70277778	-26.5	1.552083333
Carleton	488948.76	4923159.06	44.46165278	-93.13892222	2	N	MAH00045A	2017	7	24	13	31.50625	37	1.385416667
Carleton	488948.76	4923159.06	44.46165278	-93.13892222	2	P	MAH00045A	2017	7	24	13	36.87916667	182	0.666666667
Carleton	488948.76	4923159.06	44.46165278	-93.13892222	2	N	MAH00045A	2017	7	24	13	40.11805556	-32.5	0.333333333
Carleton	488948.76	4923159.06	44.46165278	-93.13892222	2	N	MAH00045A	2017	7	24	13	42.35208333	62.25	1.072916667
Carleton	488948.76	4923159.06	44.46165278	-93.13892222	2	P	MAH00045A	2017	7	24	13	44.64791667	164.5	0.59375
Carleton	488948.76	4923159.06	44.46165278	-93.13892222	2	N	MAH00045A	2017	7	24	13	45.48194444	-42.25	1.302083333
Carleton	488948.76	4923159.06	44.46165278	-93.13892222	2	P	MAH00045A	2017	7	24	13	46.60902778	137.5	0.96875
Carleton	488948.76	4923159.06	44.46165278	-93.13892222	2	N	MAH00045A	2017	7	24	13	47.12916667	-28	1.260416667
Carleton	488948.76	4923159.06	44.46165278	-93.13892222	2	P	MAH00045A	2017	7	24	13	52.17291667	127.25	0.958333333
Carleton	488948.76	4923159.06	44.46165278	-93.13892222	2	P	MAH00045A	2017	7	24	13	55.08194444	-76.25	1.21875
Carleton	488948.76	4923159.06	44.46165278	-93.13892222	2	P	MAH00045A	2017	7	24	13	56.24930556	-124	1.260416667
Carleton	488948.76	4923159.06	44.46165278	-93.13892222	2	N	MAH00045A	2017	7	24	13	58.61388889	-60.25	1.677083333
Carleton	488948.76	4923159.06	44.46165278	-93.13892222	2	N	MAH00045A	2017	7	24	13	59.71319444	-54.5	0.84375
Carleton	488948.76	4923159.06	44.46165278	-93.13892222	3	P	MAH00046A	2017	7	24	14	13.49166667	-53.75	1.8125
Carleton	488948.76	4923159.06	44.46165278	-93.13892222	3	N	MAH00046A	2017	7	24	14	14.94097222	-61.75	1.864583333
Carleton	488948.76	4923159.06	44.46165278	-93.13892222	3	N	MAH00046A	2017	7	24	14	15.17291667	-69.5	1.4375
Carleton	488948.76	4923159.06	44.46165278	-93.13892222	3	P	MAH00046A	2017	7	24	14	17.46111111	-79	1.8125
Carleton	488948.76	4923159.06	44.46165278	-93.13892222	3	N	MAH00046A	2017	7	24	14	17.93819444	132.75	1.010416667
Carleton	488948.76	4923159.06	44.46165278	-93.13892222	3	N	MAH00046A	2017	7	24	14	18.20833333	144.75	0.90625
Carleton	488948.76	4923159.06	44.46165278	-93.13892222	3	P	MAH00046A	2017	7	24	14	18.39652778	-80	2.041666667
Carleton	488948.76	4923159.06	44.46165278	-93.13892222	3	P	MAH00046A	2017	7	24	14	21.10486111	15.5	1.375
Carleton	488948.76	4923159.06	44.46165278	-93.13892222	3	N	MAH00046A	2017	7	24	14	25.39583333	-77.5	2.020833333
Carleton	488948.76	4923159.06	44.46165278	-93.13892222	3	N	MAH00046A	2017	7	24	14	25.76458333	21	1
Carleton	488948.76	4923159.06	44.46165278	-93.13892222	3	P	MAH00046A	2017	7	24	14	26.16805556	-80.25	1.5
Carleton	488948.76	4923159.06	44.46165278	-93.13892222	3	P	MAH00046A	2017	7	24	14	32.60625	-103	1.770833333
Carleton	488948.76	4923159.06	44.46165278	-93.13892222	3	P	MAH00046A	2017	7	24	14	35.85625	-72	1.625
Carleton	488948.76	4923159.06	44.46165278	-93.13892222	3	P	MAH00046A	2017	7	24	14	39.54583333	-51.25	1.84375
Carleton	488948.76	4923159.06	44.46165278	-93.13892222	3	N	MAH00046A	2017	7	24	14	41.54305556	-65	1.708333333
Carleton	488948.76	4923159.06	44.46165278	-93.13892222	3	N	MAH00046A	2017	7	24	14	42.35277778	-50.25	1.28125
Carleton	488948.76	4923159.06	44.46165278	-93.13892222	3	N	MAH00046A	2017	7	24	14	43.76180556	-65.75	1.645833333
Carleton	488948.76	4923159.06	44.46165278	-93.13892222	3	P	MAH00046A	2017	7	24	14	48.25763889	-91.25	1.520833333
Carleton	488948.76	4923159.06	44.46165278	-93.13892222	3	N	MAH00046A	2017	7	24	14	54.24236111	-30.5	0.4375
Carleton	488948.76	4923159.06	44.46165278	-93.13892222	1	P	MAH00024	2017	7	31	10	34.18263889	-104.75	0.510416667
Carleton	488948.76	4923159.06	44.46165278	-93.13892222	1	N	MAH00024	2017	7	31	10	43.51458333	-83.25	1.572916667
Carleton	488948.76	4923159.06	44.46165278	-93.13892222	1	P	MAH00024	2017	7	31	10	50.37222222	95	0.489583333
Carleton	488948.76	4923159.06	44.46165278	-93.13892222	1	N	MAH00024	2017	7	31	10	50.9125	-17	1.1875
Carleton	488948.76	4923159.06	44.46165278	-93.13892222	1	P	MAH00024	2017	7	31	10	56.54722222	-111.5	0.4375
Carleton	488948.76	4923159.06	44.46165278	-93.13892222	1	N	MAH00024	2017	7	31	11	2.838888889	-158.25	1.28125
Carleton	488948.76	4923159.06	44.46165278	-93.13892222	1	N	MAH00024	2017	7	31	11	4.5875	118	0.447916667
Carleton	488948.76	4923159.06	44.46165278	-93.13892222	1	N	MAH00024	2017	7	31	11	5.236111111	110.25	0.40625
Carleton	488948.76	4923159.06	44.46165278	-93.13892222	1	N	MAH00024	2017	7	31	11	8.672222222	-161.75	1.21875
Carleton	488948.76	4923159.06	44.46165278	-93.13892222	2	P	MAH00025	2017	7	31	11	22.21041667	-72.75	1.708333333
Carleton	488948.76	4923159.06	44.46165278	-93.13892222	2	N	MAH00025	2017	7	31	11	23.75972222	46.75	1.833333333
Carleton	488948.76	4923159.06	44.46165278	-93.13892222	2	N	MAH00025	2017	7	31	11	24.05625	-85.75	1.291666667
Carleton	488948.76	4923159.06	44.46165278	-93.13892222	2	N	MAH00025	2017	7	31	11	24.37847222	73.75	1.604166667
Carleton	488948.76	4923159.06	44.46165278	-93.13892222	2	N	MAH00025	2017	7	31	11	24.66875	65.5	1.895833333
Carleton	488948.76	4923159.06	44.46165278	-93.13892222	2	P	MAH00025	2017	7	31	11	25.62152778	64	1.989583333
Carleton	488948.76	4923159.06	44.46165278	-93.13892222	2	N	MAH00025	2017	7	31	11	28.37638889	6.5	1.760416667
Carleton	488948.76	4923159.06	44.46165278	-93.13892222	2	N	MAH00025	2017	7	31	11	29.16319444	-157.75	1.260416667
Carleton	488948.76	4923159.06	44.46165278	-93.13892222	2	N	MAH00025	2017	7	31	11	30.40486111	41.75	1.427083333
Carleton	488948.76	4923159.06	44.46165278	-93.13892222	2	N	MAH00025	2017	7	31	11	31.54305556	-6.75	2.03125
Carleton	488948.76	4923159.06	44.46165278	-93.13892222	2	P	MAH00025	2017	7	31	11	33.56319444	-18	2.333333333
Carleton	488948.76	4923159.06	44.46165278	-93.13892222	2	N	MAH00025	2017	7	31	11	33.91875	65.5	1.90625
Carleton	488948.76	4923159.06	44.46165278	-93.13892222	2	N	MAH00025	2017	7	31	11	34.33888889	-12.25	2.125
Carleton	488948.76	4923159.06	44.46165278	-93.13892222	2	P	MAH00025	2017	7	31	11	36.0125	3.25	2.083333333
Carleton	488948.76	4923159.06	44.46165278	-93.13892222	2	P	MAH00025	2017	7	31	11	39.40416667	-161	1.333333333
Carleton	488948.76	4923159.06	44.46165278	-93.13892222	2	P	MAH00025	2017	7	31	11	41.71458333	6.25	1.25
Carleton	488948.76	4923159.06	44.46165278	-93.13892222	2	P	MAH00025	2017	7	31	11	41.81944444	-103.25	1.541666667
Carleton	488948.76	4923159.06	44.46165278	-93.13892222	2	P	MAH00025	2017	7	31	11	48.25138889	19.75	2.020833333
Carleton	488948.76	4923159.06	44.46165278	-93.13892222	2	P	MAH00025	2017	7	31	11	55.16805556	-159	1.645833333
Carleton	488948.76	4923159.06	44.46165278	-93.13892222	2	P	MAH00025	2017	7	31	12	7.079861111	-9.75	3.25
Carleton	488948.76	4923159.06	44.46165278	-93.13892222	3	P	MAH00023	2017	7	31	9	33.20208333	1.25	3.4375
Carleton	488948.76	4923159.06	44.46165278	-93.13892222	3	N	MAH00023	2017	7	31	9	33.92847222	177	0.9375
Carleton	488948.76	4923159.06	44.46165278	-93.13892222	3	P	MAH00023	2017	7	31	9	35.33611111	7.5	3.625
Carleton	488948.76	4923159.06	44.46165278	-93.13892222	3	N	MAH00023	2017	7	31	9	37.54652778	67.75	1.572916667
Carleton	488948.76	4923159.06	44.46165278	-93.13892222	3	N	MAH00023	2017	7	31	9	38.77986111	149.25	0.979166667
Carleton	488948.76	4923159.06	44.46165278	-93.13892222	3	N	MAH00023	2017	7	31	9	39.13125	-1.75	1.083333333
Carleton	488948.76	4923159.06	44.46165278	-93.13892222	3	N	MAH00023	2017	7	31	9	40.81666667	-121.25	2.21875
Carleton	488948.76	4923159.06	44.46165278	-93.13892222	3	N	MAH00023	2017	7	31	9	44.00902778	-120.25	1.458333333
Carleton	488948.76	4923159.06	44.46165278	-93.13892222	3	P	MAH00023	2017	7	31	9	46.18541667	-129.5	1.104166667
Carleton	488948.76	4923159.06	44.46165278	-93.13892222	3	N	MAH00023	2017	7	31	9	47.73055556	26.5	1.677083333
Carleton	488948.76	4923159.06	44.46165278	-93.13892222	3	N	MAH00023	2017	7	31	9	49.66666667	-129	1.875
Carleton	488948.76	4923159.06	44.46165278	-93.13892222	3	P	MAH00023	2017	7	31	9	52.94722222	90.25	1.1875
Carleton	488948.76	4923159.06	44.46165278	-93.13892222	3	N	MAH00023	2017	7	31	9	53.95625	21	2.395833333
Carleton	488948.76	4923159.06	44.46165278	-93.13892222	3	P	MAH00023	2017	7	31	9	59.49791667	-136.25	1.604166667
Carleton	488948.76	4923159.06	44.46165278	-93.13892222	3	P	MAH00023	2017	7	31	10	2.234722222	53.75	2.25
Carleton	488948.76	4923159.06	44.46165278	-93.13892222	3	P	MAH00023	2017	7	31	10	4.234722222	0	2.135416667
Carleton	488948.76	4923159.06	44.46165278	-93.13892222	3	P	MAH00023	2017	7	31	10	5.342361111	13.25	1.302083333
Carleton	488948.76	4923159.06	44.46165278	-93.13892222	3	P	MAH00023	2017	7	31	10	6.350694444	-123.25	1.34375
Carleton	488948.76	4923159.06	44.46165278	-93.13892222	3	P	MAH00023	2017	7	31	10	14.40625	15.5	2.114583333
Carleton	488948.76	4923159.06	44.46165278	-93.13892222	1	P	MAH00050	2017	8	4	13	2.50625	-91	0.666666667
Carleton	488948.76	4923159.06	44.46165278	-93.13892222	1	P	MAH00050	2017	8	4	13	4.891666667	-165	0.510416667
Carleton	488948.76	4923159.06	44.46165278	-93.13892222	1	P	MAH00050	2017	8	4	13	12.46388889	152.25	0.802083333
Carleton	488948.76	4923159.06	44.46165278	-93.13892222	1	P	MAH00050	2017	8	4	13	23.12708333	177	0.697916667
Carleton	488948.76	4923159.06	44.46165278	-93.13892222	1	N	MAH00050	2017	8	4	13	33.25208333	151.5	1.15625
Carleton	488948.76	4923159.06	44.46165278	-93.13892222	1	P	MAH00050	2017	8	4	13	40.06805556	165	1.520833333
Carleton	488948.76	4923159.06	44.46165278	-93.13892222	1	P	MAH00050	2017	8	4	13	47.72638889	-171.5	0.572916667
Carleton	488948.76	4923159.06	44.46165278	-93.13892222	2	P	MAH00052	2017	8	4	14	50.02013889	-68	2.125
Carleton	488948.76	4923159.06	44.46165278	-93.13892222	2	N	MAH00052	2017	8	4	14	53.99583333	149.25	0.791666667
Carleton	488948.76	4923159.06	44.46165278	-93.13892222	2	N	MAH00052	2017	8	4	14	54.64097222	117.5	0.8125
Carleton	488948.76	4923159.06	44.46165278	-93.13892222	2	N	MAH00052	2017	8	4	14	56.79236111	131.5	0.635416667
Carleton	488948.76	4923159.06	44.46165278	-93.13892222	2	N	MAH00052	2017	8	4	14	58.83611111	101.75	1.510416667
Carleton	488948.76	4923159.06	44.46165278	-93.13892222	2	N	MAH00052	2017	8	4	15	3.479166667	110	1.427083333
Carleton	488948.76	4923159.06	44.46165278	-93.13892222	2	N	MAH00052	2017	8	4	15	5.265277778	130.75	0.739583333
Carleton	488948.76	4923159.06	44.46165278	-93.13892222	2	N	MAH00052	2017	8	4	15	10.11944444	34.5	0.791666667
Carleton	488948.76	4923159.06	44.46165278	-93.13892222	2	N	MAH00052	2017	8	4	15	11.74375	131.5	0.822916667
Carleton	488948.76	4923159.06	44.46165278	-93.13892222	2	N	MAH00052	2017	8	4	15	12.4625	125.75	0.645833333
Carleton	488948.76	4923159.06	44.46165278	-93.13892222	2	N	MAH00052	2017	8	4	15	15.79166667	146.5	0.65625
Carleton	488948.76	4923159.06	44.46165278	-93.13892222	2	P	MAH00052	2017	8	4	15	22.96527778	101.75	0.927083333
Carleton	488948.76	4923159.06	44.46165278	-93.13892222	2	P	MAH00052	2017	8	4	15	37.61041667	-60.75	1.677083333
Carleton	488948.76	4923159.06	44.46165278	-93.13892222	2	P	MAH00052	2017	8	4	15	41.11527778	105.5	1.322916667
Carleton	488948.76	4923159.06	44.46165278	-93.13892222	3	N	MAH00051	2017	8	4	13	55.72569444	-99	1.458333333
Carleton	488948.76	4923159.06	44.46165278	-93.13892222	3	P	MAH00051	2017	8	4	13	57.52916667	162.25	1.645833333
Carleton	488948.76	4923159.06	44.46165278	-93.13892222	3	N	MAH00051	2017	8	4	13	58.48819444	156.75	1.552083333
Carleton	488948.76	4923159.06	44.46165278	-93.13892222	3	P	MAH00051	2017	8	4	13	58.71111111	170.5	1.125
Carleton	488948.76	4923159.06	44.46165278	-93.13892222	3	N	MAH00051	2017	8	4	13	59.09444444	126.75	1.385416667
Carleton	488948.76	4923159.06	44.46165278	-93.13892222	3	P	MAH00051	2017	8	4	13	59.27847222	166.25	0.625
Carleton	488948.76	4923159.06	44.46165278	-93.13892222	3	N	MAH00051	2017	8	4	13	59.39236111	161	0.927083333
Carleton	488948.76	4923159.06	44.46165278	-93.13892222	3	P	MAH00051	2017	8	4	14	0.724305556	129.5	1.416666667
Carleton	488948.76	4923159.06	44.46165278	-93.13892222	3	P	MAH00051	2017	8	4	14	1.363194444	147	1.697916667
Carleton	488948.76	4923159.06	44.46165278	-93.13892222	3	N	MAH00051	2017	8	4	14	2.477777778	-184.25	0.65625
Carleton	488948.76	4923159.06	44.46165278	-93.13892222	3	P	MAH00051	2017	8	4	14	4.639583333	161.25	0.916666667
Carleton	488948.76	4923159.06	44.46165278	-93.13892222	3	P	MAH00051	2017	8	4	14	6.807638889	161	1.5
Carleton	488948.76	4923159.06	44.46165278	-93.13892222	3	P	MAH00051	2017	8	4	14	7.579166667	146	0.645833333
Carleton	488948.76	4923159.06	44.46165278	-93.13892222	3	N	MAH00051	2017	8	4	14	8.997222222	-109.25	0.770833333
Carleton	488948.76	4923159.06	44.46165278	-93.13892222	3	P	MAH00051	2017	8	4	14	10.79305556	167.5	0.677083333
Carleton	488948.76	4923159.06	44.46165278	-93.13892222	3	P	MAH00051	2017	8	4	14	12.71736111	-59.75	2.635416667
Carleton	488948.76	4923159.06	44.46165278	-93.13892222	3	N	MAH00051	2017	8	4	14	14.25	107.25	0.416666667
Carleton	488948.76	4923159.06	44.46165278	-93.13892222	3	N	MAH00051	2017	8	4	14	16.41319444	60.5	0.510416667
Carleton	488948.76	4923159.06	44.46165278	-93.13892222	3	N	MAH00051	2017	8	4	14	26.74444444	-70	0.427083333
Carleton	488948.76	4923159.06	44.46165278	-93.13892222	3	N	MAH00051	2017	8	4	14	41.07152778	132	1.208333333
Carleton	488948.76	4923159.06	44.46165278	-93.13892222	1	P	MAH00054	2017	8	5	10	29.98333333	-100.25	0.729166667
Carleton	488948.76	4923159.06	44.46165278	-93.13892222	1	P	MAH00054	2017	8	5	10	37.33055556	-156.75	1.09375
Carleton	488948.76	4923159.06	44.46165278	-93.13892222	1	P	MAH00054	2017	8	5	10	40.99930556	96	0.541666667
Carleton	488948.76	4923159.06	44.46165278	-93.13892222	1	P	MAH00054	2017	8	5	10	44.43541667	-106.5	0.614583333
Carleton	488948.76	4923159.06	44.46165278	-93.13892222	1	N	MAH00054	2017	8	5	11	9.208333333	153.75	0.822916667
Carleton	488948.76	4923159.06	44.46165278	-93.13892222	2	N	MAH00053	2017	8	5	9	32.96666667	42.5	1.083333333
Carleton	488948.76	4923159.06	44.46165278	-93.13892222	2	N	MAH00053	2017	8	5	9	33.64791667	31.25	0.958333333
Carleton	488948.76	4923159.06	44.46165278	-93.13892222	2	N	MAH00053	2017	8	5	9	34.94722222	-116.25	1.239583333
Carleton	488948.76	4923159.06	44.46165278	-93.13892222	2	N	MAH00053	2017	8	5	9	36.76388889	67.25	1.3125
Carleton	488948.76	4923159.06	44.46165278	-93.13892222	2	N	MAH00053	2017	8	5	9	40.47083333	-136.25	1.375
Carleton	488948.76	4923159.06	44.46165278	-93.13892222	2	N	MAH00053	2017	8	5	9	44.20902778	-140.5	2.4375
Carleton	488948.76	4923159.06	44.46165278	-93.13892222	2	N	MAH00053	2017	8	5	9	45.575	8	1.135416667
Carleton	488948.76	4923159.06	44.46165278	-93.13892222	2	N	MAH00053	2017	8	5	9	49.19791667	39.75	1.364583333
Carleton	488948.76	4923159.06	44.46165278	-93.13892222	2	P	MAH00053	2017	8	5	9	51.19166667	-86.25	2.03125
Carleton	488948.76	4923159.06	44.46165278	-93.13892222	2	N	MAH00053	2017	8	5	9	54.02291667	-83.25	1.729166667
Carleton	488948.76	4923159.06	44.46165278	-93.13892222	2	N	MAH00053	2017	8	5	9	55.99444444	28.5	1.041666667
Carleton	488948.76	4923159.06	44.46165278	-93.13892222	2	P	MAH00053	2017	8	5	10	4.477777778	72.25	1.9375
Carleton	488948.76	4923159.06	44.46165278	-93.13892222	2	P	MAH00053	2017	8	5	10	22.03263889	-135.5	1.333333333
Carleton	488948.76	4923159.06	44.46165278	-93.13892222	3	N	MAH00055	2017	8	5	11	24.87708333	-96.5	1.052083333
Carleton	488948.76	4923159.06	44.46165278	-93.13892222	3	N	MAH00055	2017	8	5	11	25.00763889	-43.25	4.020833333
Carleton	488948.76	4923159.06	44.46165278	-93.13892222	3	P	MAH00055	2017	8	5	11	28.825	82	0.635416667
Carleton	488948.76	4923159.06	44.46165278	-93.13892222	3	P	MAH00055	2017	8	5	11	30.51875	-59.75	0.729166667
Carleton	488948.76	4923159.06	44.46165278	-93.13892222	3	N	MAH00055	2017	8	5	11	32.03958333	33	1.885416667
Carleton	488948.76	4923159.06	44.46165278	-93.13892222	3	N	MAH00055	2017	8	5	11	32.50694444	-132	0.78125
Carleton	488948.76	4923159.06	44.46165278	-93.13892222	3	N	MAH00055	2017	8	5	11	32.72638889	17.25	1.739583333
Carleton	488948.76	4923159.06	44.46165278	-93.13892222	3	N	MAH00055	2017	8	5	11	34.48125	-45.75	4.052083333
Carleton	488948.76	4923159.06	44.46165278	-93.13892222	3	N	MAH00055	2017	8	5	11	35.83472222	201	0.729166667
Carleton	488948.76	4923159.06	44.46165278	-93.13892222	3	P	MAH00055	2017	8	5	11	36.80277778	29.25	1.489583333
Carleton	488948.76	4923159.06	44.46165278	-93.13892222	3	P	MAH00055	2017	8	5	11	39.74097222	-26.5	2.1875
Carleton	488948.76	4923159.06	44.46165278	-93.13892222	3	P	MAH00055	2017	8	5	11	41.85138889	198.5	1.135416667
Carleton	488948.76	4923159.06	44.46165278	-93.13892222	3	P	MAH00055	2017	8	5	11	44.85347222	-30.5	2.041666667
Carleton	488948.76	4923159.06	44.46165278	-93.13892222	3	P	MAH00055	2017	8	5	11	49.36458333	-136.5	1.520833333
Carleton	488948.76	4923159.06	44.46165278	-93.13892222	3	P	MAH00055	2017	8	5	11	52.63055556	52	1.4375
Carleton	488948.76	4923159.06	44.46165278	-93.13892222	3	N	MAH00055	2017	8	5	11	54.05277778	44.5	1.5625
Carleton	488948.76	4923159.06	44.46165278	-93.13892222	3	P	MAH00055	2017	8	5	11	57.83055556	190	0.552083333
Carleton	488948.76	4923159.06	44.46165278	-93.13892222	3	P	MAH00055	2017	8	5	11	58.72916667	188.5	0.65625
Carleton	488948.76	4923159.06	44.46165278	-93.13892222	1	P	MAH00057	2017	8	7	8	55.28402778	39.5	1.458333333
Carleton	488948.76	4923159.06	44.46165278	-93.13892222	1	P	MAH00057	2017	8	7	9	3.542361111	-121.75	1.010416667
Carleton	488948.76	4923159.06	44.46165278	-93.13892222	1	N	MAH00057	2017	8	7	9	8.734722222	49.75	1.072916667
Carleton	488948.76	4923159.06	44.46165278	-93.13892222	1	N	MAH00057	2017	8	7	9	9.847916667	47.5	1.46875
Carleton	488948.76	4923159.06	44.46165278	-93.13892222	1	P	MAH00057	2017	8	7	9	15.64166667	-117	0.729166667
Carleton	488948.76	4923159.06	44.46165278	-93.13892222	1	P	MAH00057	2017	8	7	9	19.78611111	28.75	1.135416667
Carleton	488948.76	4923159.06	44.46165278	-93.13892222	1	N	MAH00057	2017	8	7	9	23.59930556	-65.5	0.635416667
Carleton	488948.76	4923159.06	44.46165278	-93.13892222	1	P	MAH00057	2017	8	7	9	33.41111111	-106.5	0.770833333
Carleton	488948.76	4923159.06	44.46165278	-93.13892222	1	N	MAH00057	2017	8	7	9	34.58819444	-101.25	0.6875
Carleton	488948.76	4923159.06	44.46165278	-93.13892222	1	P	MAH00057	2017	8	7	9	45.20555556	-131.5	0.84375
Carleton	488948.76	4923159.06	44.46165278	-93.13892222	2	P	MAH00058	2017	8	7	9	54.30763889	-134.25	1.010416667
Carleton	488948.76	4923159.06	44.46165278	-93.13892222	2	P	MAH00058	2017	8	7	9	55.84930556	41.5	0.635416667
Carleton	488948.76	4923159.06	44.46165278	-93.13892222	2	N	MAH00058	2017	8	7	9	56.38472222	37.75	1.729166667
Carleton	488948.76	4923159.06	44.46165278	-93.13892222	2	N	MAH00058	2017	8	7	9	57.00694444	133	1.010416667
Carleton	488948.76	4923159.06	44.46165278	-93.13892222	2	N	MAH00058	2017	8	7	9	59.06597222	-103.5	1.020833333
Carleton	488948.76	4923159.06	44.46165278	-93.13892222	2	P	MAH00058	2017	8	7	9	59.73819444	-133.5	1.020833333
Carleton	488948.76	4923159.06	44.46165278	-93.13892222	2	P	MAH00058	2017	8	7	10	0.166666667	68.25	1.895833333
Carleton	488948.76	4923159.06	44.46165278	-93.13892222	2	N	MAH00058	2017	8	7	10	1.641666667	-87.5	1.302083333
Carleton	488948.76	4923159.06	44.46165278	-93.13892222	2	N	MAH00058	2017	8	7	10	1.688194444	181	4.447916667
Carleton	488948.76	4923159.06	44.46165278	-93.13892222	2	N	MAH00058	2017	8	7	10	2.711111111	17	3.739583333
Carleton	488948.76	4923159.06	44.46165278	-93.13892222	2	P	MAH00058	2017	8	7	10	2.990277778	59.25	1.854166667
Carleton	488948.76	4923159.06	44.46165278	-93.13892222	2	P	MAH00058	2017	8	7	10	3.229861111	-83	1.114583333
Carleton	488948.76	4923159.06	44.46165278	-93.13892222	2	N	MAH00058	2017	8	7	10	5.286805556	-168.25	1.208333333
Carleton	488948.76	4923159.06	44.46165278	-93.13892222	2	P	MAH00058	2017	8	7	10	7.553472222	78.75	1.71875
Carleton	488948.76	4923159.06	44.46165278	-93.13892222	2	N	MAH00058	2017	8	7	10	14.96527778	-70.75	1.53125
Carleton	488948.76	4923159.06	44.46165278	-93.13892222	2	N	MAH00058	2017	8	7	10	15.42777778	-105.25	1.395833333
Carleton	488948.76	4923159.06	44.46165278	-93.13892222	2	N	MAH00058	2017	8	7	10	22.82708333	20.75	4.59375
Carleton	488948.76	4923159.06	44.46165278	-93.13892222	2	P	MAH00058	2017	8	7	10	26.22916667	-139.75	1.510416667
Carleton	488948.76	4923159.06	44.46165278	-93.13892222	2	P	MAH00058	2017	8	7	10	28.85763889	-136.75	1.291666667
Carleton	488948.76	4923159.06	44.46165278	-93.13892222	2	P	MAH00058	2017	8	7	10	40.87152778	-133.75	0.916666667
Carleton	488948.76	4923159.06	44.46165278	-93.13892222	1	P	MAH00059	2017	8	11	13	28.425	157.75	0.75
Carleton	488948.76	4923159.06	44.46165278	-93.13892222	1	P	MAH00059	2017	8	11	13	29.68541667	131.5	0.5
Carleton	488948.76	4923159.06	44.46165278	-93.13892222	1	P	MAH00059	2017	8	11	13	31.06875	100.75	1.614583333
Carleton	488948.76	4923159.06	44.46165278	-93.13892222	1	P	MAH00059	2017	8	11	13	32.00416667	186	0.614583333
Carleton	488948.76	4923159.06	44.46165278	-93.13892222	1	P	MAH00059	2017	8	11	13	32.22777778	-34.5	0.927083333
Carleton	488948.76	4923159.06	44.46165278	-93.13892222	1	P	MAH00059	2017	8	11	13	35.29027778	45	1.3125
Carleton	488948.76	4923159.06	44.46165278	-93.13892222	1	P	MAH00059	2017	8	11	13	36.29930556	164.25	1.010416667
Carleton	488948.76	4923159.06	44.46165278	-93.13892222	1	P	MAH00059	2017	8	11	13	38.70416667	125.5	0.510416667
Carleton	488948.76	4923159.06	44.46165278	-93.13892222	1	P	MAH00059	2017	8	11	13	39.65555556	78.5	1.052083333
Carleton	488948.76	4923159.06	44.46165278	-93.13892222	1	P	MAH00059	2017	8	11	13	41.68958333	144.25	0.239583333
Carleton	488948.76	4923159.06	44.46165278	-93.13892222	1	N	MAH00059	2017	8	11	13	43.61319444	146.5	0.9375
Carleton	488948.76	4923159.06	44.46165278	-93.13892222	1	N	MAH00059	2017	8	11	13	48.35347222	141	0.59375
Carleton	488948.76	4923159.06	44.46165278	-93.13892222	1	N	MAH00059	2017	8	11	13	50.29930556	135.5	0.645833333
Carleton	488948.76	4923159.06	44.46165278	-93.13892222	1	N	MAH00059	2017	8	11	14	1.384027778	162.5	0.5625
Carleton	488948.76	4923159.06	44.46165278	-93.13892222	2	N	MAH00061	2017	8	11	15	16.17638889	155	1.125
Carleton	488948.76	4923159.06	44.46165278	-93.13892222	2	N	MAH00061	2017	8	11	15	21.94652778	47	0.979166667
Carleton	488948.76	4923159.06	44.46165278	-93.13892222	2	P	MAH00061	2017	8	11	15	27.93402778	-72.75	2.020833333
Carleton	488948.76	4923159.06	44.46165278	-93.13892222	2	N	MAH00061	2017	8	11	15	30.18125	130.25	1.614583333
Carleton	488948.76	4923159.06	44.46165278	-93.13892222	2	N	MAH00061	2017	8	11	15	33.22916667	134	1.479166667
Carleton	488948.76	4923159.06	44.46165278	-93.13892222	2	N	MAH00061	2017	8	11	15	36.88819444	153.25	1.479166667
Carleton	488948.76	4923159.06	44.46165278	-93.13892222	2	N	MAH00061	2017	8	11	15	48.05347222	146.75	1.541666667
Carleton	488948.76	4923159.06	44.46165278	-93.13892222	2	N	MAH00061	2017	8	11	15	54.97847222	-101.5	1.197916667
Carleton	488948.76	4923159.06	44.46165278	-93.13892222	2	P	MAH00061	2017	8	11	15	56.60902778	27	0.479166667
Carleton	488948.76	4923159.06	44.46165278	-93.13892222	2	N	MAH00061	2017	8	11	16	2.118055556	13	1.03125
Carleton	488948.76	4923159.06	44.46165278	-93.13892222	3	P	MAH00060	2017	8	11	14	23.16388889	-60.25	1.229166667
Carleton	488948.76	4923159.06	44.46165278	-93.13892222	3	N	MAH00060	2017	8	11	14	37.16458333	133	0.6875
Carleton	488948.76	4923159.06	44.46165278	-93.13892222	3	P	MAH00060	2017	8	11	14	43.39236111	103.5	2.208333333
Carleton	488948.76	4923159.06	44.46165278	-93.13892222	3	P	MAH00060	2017	8	11	14	57.09652778	60.5	0.65625
Carleton	488948.76	4923159.06	44.46165278	-93.13892222	1	N	MAH00064	2017	8	15	14	42.475	115.5	1.322916667
Carleton	488948.76	4923159.06	44.46165278	-93.13892222	1	N	MAH00064	2017	8	15	14	44.69236111	-101.5	1.15625
Carleton	488948.76	4923159.06	44.46165278	-93.13892222	1	N	MAH00064	2017	8	15	14	46.00347222	151	0.760416667
Carleton	488948.76	4923159.06	44.46165278	-93.13892222	1	P	MAH00064	2017	8	15	14	48.48680556	135.5	0.979166667
Carleton	488948.76	4923159.06	44.46165278	-93.13892222	1	N	MAH00064	2017	8	15	14	49.75902778	-48	1.177083333
Carleton	488948.76	4923159.06	44.46165278	-93.13892222	1	N	MAH00064	2017	8	15	14	52.29305556	68	0.364583333
Carleton	488948.76	4923159.06	44.46165278	-93.13892222	1	P	MAH00064	2017	8	15	14	54.97777778	143.25	0.6875
Carleton	488948.76	4923159.06	44.46165278	-93.13892222	1	N	MAH00064	2017	8	15	14	58.85833333	-9.5	0.854166667
Carleton	488948.76	4923159.06	44.46165278	-93.13892222	1	N	MAH00064	2017	8	15	15	1.188194444	8.5	1.635416667
Carleton	488948.76	4923159.06	44.46165278	-93.13892222	1	P	MAH00064	2017	8	15	15	3.372222222	97.5	1.125
Carleton	488948.76	4923159.06	44.46165278	-93.13892222	1	N	MAH00064	2017	8	15	15	6.825694444	52.25	0.96875
Carleton	488948.76	4923159.06	44.46165278	-93.13892222	1	N	MAH00064	2017	8	15	15	11.84861111	-91	1.177083333
Carleton	488948.76	4923159.06	44.46165278	-93.13892222	1	N	MAH00064	2017	8	15	15	14.35694444	73.25	1.166666667
Carleton	488948.76	4923159.06	44.46165278	-93.13892222	1	P	MAH00064	2017	8	15	15	16.79444444	-80	1.583333333
Carleton	488948.76	4923159.06	44.46165278	-93.13892222	1	N	MAH00064	2017	8	15	15	18.81041667	-90.5	1.333333333
Carleton	488948.76	4923159.06	44.46165278	-93.13892222	2	P	MAH00063	2017	8	15	13	53.23541667	103.5	4.895833333
Carleton	488948.76	4923159.06	44.46165278	-93.13892222	2	N	MAH00063	2017	8	15	13	53.54513889	77.5	0.885416667
Carleton	488948.76	4923159.06	44.46165278	-93.13892222	2	N	MAH00063	2017	8	15	13	53.8375	-175.25	0.822916667
Carleton	488948.76	4923159.06	44.46165278	-93.13892222	2	N	MAH00063	2017	8	15	13	55.63194444	56.5	0.885416667
Carleton	488948.76	4923159.06	44.46165278	-93.13892222	2	N	MAH00063	2017	8	15	13	56.62569444	-55.5	1.322916667
Carleton	488948.76	4923159.06	44.46165278	-93.13892222	2	N	MAH00063	2017	8	15	13	59.21319444	-114	1.75
Carleton	488948.76	4923159.06	44.46165278	-93.13892222	2	N	MAH00063	2017	8	15	14	5.394444444	151	1.260416667
Carleton	488948.76	4923159.06	44.46165278	-93.13892222	2	P	MAH00063	2017	8	15	14	5.963194444	80.25	1.135416667
Carleton	488948.76	4923159.06	44.46165278	-93.13892222	2	N	MAH00063	2017	8	15	14	10.1	58.5	1
Carleton	488948.76	4923159.06	44.46165278	-93.13892222	2	P	MAH00063	2017	8	15	14	11.77777778	66.75	0.927083333
Carleton	488948.76	4923159.06	44.46165278	-93.13892222	2	N	MAH00063	2017	8	15	14	13.46875	-44.5	1.489583333
Carleton	488948.76	4923159.06	44.46165278	-93.13892222	2	N	MAH00063	2017	8	15	14	16.13263889	-126	2.010416667
Carleton	488948.76	4923159.06	44.46165278	-93.13892222	2	N	MAH00063	2017	8	15	14	18.17847222	-38.5	1.583333333
Carleton	488948.76	4923159.06	44.46165278	-93.13892222	2	P	MAH00063	2017	8	15	14	18.75902778	88.5	4.03125
Carleton	488948.76	4923159.06	44.46165278	-93.13892222	1	P	MAH00065	2017	8	20	9	33.49930556	51.75	1.072916667
Carleton	488948.76	4923159.06	44.46165278	-93.13892222	1	P	MAH00065	2017	8	20	9	39.32847222	-60.25	0.645833333
Carleton	488948.76	4923159.06	44.46165278	-93.13892222	1	P	MAH00065	2017	8	20	9	41.86458333	43.75	1.3125
Carleton	488948.76	4923159.06	44.46165278	-93.13892222	1	P	MAH00065	2017	8	20	9	43.73680556	135.25	0.84375
Carleton	488948.76	4923159.06	44.46165278	-93.13892222	1	P	MAH00065	2017	8	20	9	44.78888889	63.5	1.260416667
Carleton	488948.76	4923159.06	44.46165278	-93.13892222	1	N	MAH00065	2017	8	20	9	44.98680556	30.25	6.822916667
Carleton	488948.76	4923159.06	44.46165278	-93.13892222	1	N	MAH00065	2017	8	20	9	46.39305556	68	2.895833333
Carleton	488948.76	4923159.06	44.46165278	-93.13892222	1	P	MAH00065	2017	8	20	9	47.21388889	69.75	1.416666667
Carleton	488948.76	4923159.06	44.46165278	-93.13892222	1	P	MAH00065	2017	8	20	9	49.21875	-134.5	0.96875
Carleton	488948.76	4923159.06	44.46165278	-93.13892222	1	P	MAH00065	2017	8	20	9	53.77083333	-97.75	0.927083333
Carleton	488948.76	4923159.06	44.46165278	-93.13892222	1	P	MAH00065	2017	8	20	9	55.46666667	25.25	0.708333333
Carleton	488948.76	4923159.06	44.46165278	-93.13892222	1	P	MAH00065	2017	8	20	9	58.62430556	31.5	1.34375
Carleton	488948.76	4923159.06	44.46165278	-93.13892222	1	N	MAH00065	2017	8	20	10	2.316666667	-5	1.166666667
Carleton	488948.76	4923159.06	44.46165278	-93.13892222	1	N	MAH00065	2017	8	20	10	8.700694444	-125.5	0.854166667
Carleton	488948.76	4923159.06	44.46165278	-93.13892222	2	N	MAH00066	2017	8	20	10	27.59027778	-94.25	1.59375
Carleton	488948.76	4923159.06	44.46165278	-93.13892222	2	N	MAH00066	2017	8	20	10	28.39513889	-87	1.385416667
Carleton	488948.76	4923159.06	44.46165278	-93.13892222	2	N	MAH00066	2017	8	20	10	35.09861111	-120.25	0.927083333
Carleton	488948.76	4923159.06	44.46165278	-93.13892222	2	N	MAH00066	2017	8	20	10	43.50208333	176.5	1.020833333
Carleton	488948.76	4923159.06	44.46165278	-93.13892222	2	N	MAH00066	2017	8	20	10	45.50138889	164.75	1.291666667
Carleton	488948.76	4923159.06	44.46165278	-93.13892222	2	N	MAH00066	2017	8	20	10	51.13263889	-108.25	0.979166667
Carleton	488948.76	4923159.06	44.46165278	-93.13892222	2	N	MAH00066	2017	8	20	10	56.61111111	127.5	0.895833333
Carleton	488948.76	4923159.06	44.46165278	-93.13892222	2	P	MAH00066	2017	8	20	11	1.186111111	-106.5	0.833333333
Carleton	488948.76	4923159.06	44.46165278	-93.13892222	2	N	MAH00066	2017	8	20	11	5.440972222	-151	1.020833333
Carleton	488948.76	4923159.06	44.46165278	-93.13892222	2	P	MAH00066	2017	8	20	11	11.25972222	-126.25	1.114583333
Carleton	488948.76	4923159.06	44.46165278	-93.13892222	2	P	MAH00066	2017	8	20	11	15.04722222	-111	0.78125
Carleton	488948.76	4923159.06	44.46165278	-93.13892222	3	P	MAH00067	2017	8	20	11	24.36041667	-139.75	1.322916667
Carleton	488948.76	4923159.06	44.46165278	-93.13892222	3	N	MAH00067	2017	8	20	11	27.95277778	-21.25	1.375
Carleton	488948.76	4923159.06	44.46165278	-93.13892222	3	P	MAH00067	2017	8	20	11	34.90555556	83.75	1.177083333
Carleton	488948.76	4923159.06	44.46165278	-93.13892222	3	N	MAH00067	2017	8	20	11	37.83263889	30.5	0.5625
Carleton	488948.76	4923159.06	44.46165278	-93.13892222	3	N	MAH00067	2017	8	20	11	41.81180556	-144	1.375
Carleton	488948.76	4923159.06	44.46165278	-93.13892222	3	N	MAH00067	2017	8	20	11	46.46111111	-17.5	1.885416667
Carleton	488948.76	4923159.06	44.46165278	-93.13892222	3	P	MAH00067	2017	8	20	11	48.76041667	-54.75	2.229166667
Carleton	488948.76	4923159.06	44.46165278	-93.13892222	3	N	MAH00067	2017	8	20	11	51.71805556	121	1.041666667
Carleton	488948.76	4923159.06	44.46165278	-93.13892222	3	N	MAH00067	2017	8	20	11	55.24791667	-133.25	1.302083333
Carleton	488948.76	4923159.06	44.46165278	-93.13892222	3	N	MAH00067	2017	8	20	12	3.932638889	-100.25	0.614583333
Carleton	488948.76	4923159.06	44.46165278	-93.13892222	3	N	MAH00067	2017	8	20	12	5.075694444	-93.25	0.46875
Carleton	488948.76	4923159.06	44.46165278	-93.13892222	3	N	MAH00067	2017	8	20	12	8.325	65.25	0.65625
Carleton	488948.76	4923159.06	44.46165278	-93.13892222	1	P	MAH00069	2017	8	23	10	22.66388889	154	1.0625
Carleton	488948.76	4923159.06	44.46165278	-93.13892222	1	N	MAH00069	2017	8	23	10	24.72291667	-106.75	0.614583333
Carleton	488948.76	4923159.06	44.46165278	-93.13892222	1	P	MAH00069	2017	8	23	10	25.25069444	-86.75	0.666666667
Carleton	488948.76	4923159.06	44.46165278	-93.13892222	1	P	MAH00069	2017	8	23	10	27.96388889	-112.25	1.1875
Carleton	488948.76	4923159.06	44.46165278	-93.13892222	1	N	MAH00069	2017	8	23	10	28.59861111	-155.5	0.729166667
Carleton	488948.76	4923159.06	44.46165278	-93.13892222	1	N	MAH00069	2017	8	23	10	29.05416667	-106	1.354166667
Carleton	488948.76	4923159.06	44.46165278	-93.13892222	1	P	MAH00069	2017	8	23	10	29.92361111	-105.25	1.1875
Carleton	488948.76	4923159.06	44.46165278	-93.13892222	1	P	MAH00069	2017	8	23	10	31.40138889	139	1.302083333
Carleton	488948.76	4923159.06	44.46165278	-93.13892222	1	N	MAH00069	2017	8	23	10	33.01180556	-101.75	0.708333333
Carleton	488948.76	4923159.06	44.46165278	-93.13892222	1	P	MAH00069	2017	8	23	10	37.79027778	128	0.53125
Carleton	488948.76	4923159.06	44.46165278	-93.13892222	1	N	MAH00069	2017	8	23	10	39.80138889	-102	1.083333333
Carleton	488948.76	4923159.06	44.46165278	-93.13892222	1	P	MAH00069	2017	8	23	10	45.80486111	-118.5	0.791666667
Carleton	488948.76	4923159.06	44.46165278	-93.13892222	1	N	MAH00069	2017	8	23	10	46.28055556	-131.75	1.479166667
Carleton	488948.76	4923159.06	44.46165278	-93.13892222	1	P	MAH00069	2017	8	23	10	48.87638889	144.25	1.041666667
Carleton	488948.76	4923159.06	44.46165278	-93.13892222	1	N	MAH00069	2017	8	23	10	53.42291667	-104.75	0.958333333
Carleton	488948.76	4923159.06	44.46165278	-93.13892222	1	N	MAH00069	2017	8	23	10	54.90625	158	1.125
Carleton	488948.76	4923159.06	44.46165278	-93.13892222	1	P	MAH00069	2017	8	23	10	58.125	143.5	0.989583333
Carleton	488948.76	4923159.06	44.46165278	-93.13892222	1	N	MAH00069	2017	8	23	11	9.320833333	-137.75	1.177083333
Carleton	488948.76	4923159.06	44.46165278	-93.13892222	2	N	MAH00070	2017	8	23	11	17.44027778	21.75	1.666666667
Carleton	488948.76	4923159.06	44.46165278	-93.13892222	2	N	MAH00070	2017	8	23	11	17.90833333	28.5	1.09375
Carleton	488948.76	4923159.06	44.46165278	-93.13892222	2	P	MAH00070	2017	8	23	11	19.76805556	122.25	1.145833333
Carleton	488948.76	4923159.06	44.46165278	-93.13892222	2	N	MAH00070	2017	8	23	11	21.36388889	36.5	4.8125
Carleton	488948.76	4923159.06	44.46165278	-93.13892222	2	N	MAH00070	2017	8	23	11	25.26527778	-130.75	0.885416667
Carleton	488948.76	4923159.06	44.46165278	-93.13892222	2	P	MAH00070	2017	8	23	11	25.32291667	51.75	1.4375
Carleton	488948.76	4923159.06	44.46165278	-93.13892222	2	P	MAH00070	2017	8	23	11	29.50138889	-80.75	1.75
Carleton	488948.76	4923159.06	44.46165278	-93.13892222	2	P	MAH00070	2017	8	23	11	30.17986111	-127.75	1.114583333
Carleton	488948.76	4923159.06	44.46165278	-93.13892222	2	N	MAH00070	2017	8	23	11	30.34305556	-158.5	1.083333333
Carleton	488948.76	4923159.06	44.46165278	-93.13892222	2	N	MAH00070	2017	8	23	11	32.72569444	-162.75	1.395833333
Carleton	488948.76	4923159.06	44.46165278	-93.13892222	2	N	MAH00070	2017	8	23	11	32.99791667	-161.75	1.010416667
Carleton	488948.76	4923159.06	44.46165278	-93.13892222	2	P	MAH00070	2017	8	23	11	35.49305556	44	1.697916667
Carleton	488948.76	4923159.06	44.46165278	-93.13892222	2	N	MAH00070	2017	8	23	11	35.81666667	-143.75	0.635416667
Carleton	488948.76	4923159.06	44.46165278	-93.13892222	2	P	MAH00070	2017	8	23	11	38.00833333	37.5	1.375
Carleton	488948.76	4923159.06	44.46165278	-93.13892222	2	P	MAH00070	2017	8	23	11	38.19375	-125	1.864583333
Carleton	488948.76	4923159.06	44.46165278	-93.13892222	2	N	MAH00070	2017	8	23	11	38.29027778	-158.5	1.354166667
Carleton	488948.76	4923159.06	44.46165278	-93.13892222	2	P	MAH00070	2017	8	23	11	40.82847222	34	1.333333333
Carleton	488948.76	4923159.06	44.46165278	-93.13892222	2	N	MAH00070	2017	8	23	11	44.17916667	-143.75	0.53125
Carleton	488948.76	4923159.06	44.46165278	-93.13892222	2	P	MAH00070	2017	8	23	11	44.37777778	39	1.270833333
Carleton	488948.76	4923159.06	44.46165278	-93.13892222	2	P	MAH00070	2017	8	23	12	5.070138889	33.75	1.447916667
Carleton	488948.76	4923159.06	44.46165278	-93.13892222	3	P	MAH00068	2017	8	23	9	43.08541667	130.25	1.552083333
Carleton	488948.76	4923159.06	44.46165278	-93.13892222	3	P	MAH00068	2017	8	23	9	43.31597222	-100.75	1
Carleton	488948.76	4923159.06	44.46165278	-93.13892222	3	N	MAH00068	2017	8	23	9	46.64513889	125.25	1.041666667
Carleton	488948.76	4923159.06	44.46165278	-93.13892222	3	P	MAH00068	2017	8	23	9	46.90902778	156.25	1.489583333
Carleton	488948.76	4923159.06	44.46165278	-93.13892222	3	P	MAH00068	2017	8	23	9	48.25625	114.25	1.333333333
Carleton	488948.76	4923159.06	44.46165278	-93.13892222	3	P	MAH00068	2017	8	23	9	48.6125	146	1.260416667
Carleton	488948.76	4923159.06	44.46165278	-93.13892222	3	N	MAH00068	2017	8	23	9	49.97569444	111.75	1.15625
Carleton	488948.76	4923159.06	44.46165278	-93.13892222	3	N	MAH00068	2017	8	23	9	51.00138889	115.75	1.229166667
Carleton	488948.76	4923159.06	44.46165278	-93.13892222	3	P	MAH00068	2017	8	23	9	51.24166667	-131.75	1.15625
Carleton	488948.76	4923159.06	44.46165278	-93.13892222	3	P	MAH00068	2017	8	23	9	52.40486111	-65	1.083333333
Carleton	488948.76	4923159.06	44.46165278	-93.13892222	3	N	MAH00068	2017	8	23	9	55.10625	-55.5	0.75
Carleton	488948.76	4923159.06	44.46165278	-93.13892222	3	N	MAH00068	2017	8	23	9	55.51736111	-58.75	0.541666667
Carleton	488948.76	4923159.06	44.46165278	-93.13892222	3	P	MAH00068	2017	8	23	9	56.94375	-53.25	1.979166667
Carleton	488948.76	4923159.06	44.46165278	-93.13892222	3	N	MAH00068	2017	8	23	9	58.44791667	116.75	1.125
Carleton	488948.76	4923159.06	44.46165278	-93.13892222	3	N	MAH00068	2017	8	23	9	59.81597222	120.25	1.208333333
Carleton	488948.76	4923159.06	44.46165278	-93.13892222	3	N	MAH00068	2017	8	23	10	0.302083333	123	1.145833333
Carleton	488948.76	4923159.06	44.46165278	-93.13892222	3	N	MAH00068	2017	8	23	10	2.298611111	-38.75	1.833333333
Carleton	488948.76	4923159.06	44.46165278	-93.13892222	3	P	MAH00068	2017	8	23	10	6.944444444	105.25	1.104166667
Carleton	488948.76	4923159.06	44.46165278	-93.13892222	3	P	MAH00068	2017	8	23	10	8.065972222	92.75	1.083333333
Carleton	488948.76	4923159.06	44.46165278	-93.13892222	3	P	MAH00068	2017	8	23	10	9.621527778	95.75	1.03125
Carleton	488948.76	4923159.06	44.46165278	-93.13892222	1	P	MAH00073	2017	8	30	10	48.46597222	-75.25	1.96875
Carleton	488948.76	4923159.06	44.46165278	-93.13892222	1	P	MAH00073	2017	8	30	10	48.82152778	126.75	1.125
Carleton	488948.76	4923159.06	44.46165278	-93.13892222	1	P	MAH00073	2017	8	30	10	49.46597222	30	1.75
Carleton	488948.76	4923159.06	44.46165278	-93.13892222	1	N	MAH00073	2017	8	30	10	50.02986111	-130.75	1.864583333
Carleton	488948.76	4923159.06	44.46165278	-93.13892222	1	P	MAH00073	2017	8	30	10	51.87430556	-71	1.791666667
Carleton	488948.76	4923159.06	44.46165278	-93.13892222	1	N	MAH00073	2017	8	30	10	53.41944444	-129.75	2.260416667
Carleton	488948.76	4923159.06	44.46165278	-93.13892222	1	N	MAH00073	2017	8	30	10	53.48055556	66	1.25
Carleton	488948.76	4923159.06	44.46165278	-93.13892222	1	P	MAH00073	2017	8	30	10	53.97430556	-71	1.697916667
Carleton	488948.76	4923159.06	44.46165278	-93.13892222	1	P	MAH00073	2017	8	30	10	56.33611111	30.5	1.5625
Carleton	488948.76	4923159.06	44.46165278	-93.13892222	1	P	MAH00073	2017	8	30	10	57.27013889	-73.5	1.729166667
Carleton	488948.76	4923159.06	44.46165278	-93.13892222	1	N	MAH00073	2017	8	30	10	58.94444444	122	1.145833333
Carleton	488948.76	4923159.06	44.46165278	-93.13892222	1	P	MAH00073	2017	8	30	10	59.13055556	147.5	0.510416667
Carleton	488948.76	4923159.06	44.46165278	-93.13892222	1	P	MAH00073	2017	8	30	10	59.95	55	1.385416667
Carleton	488948.76	4923159.06	44.46165278	-93.13892222	1	N	MAH00073	2017	8	30	11	1.098611111	-122.25	1.197916667
Carleton	488948.76	4923159.06	44.46165278	-93.13892222	1	N	MAH00073	2017	8	30	11	1.942361111	142.5	0.46875
Carleton	488948.76	4923159.06	44.46165278	-93.13892222	1	N	MAH00073	2017	8	30	11	3.934027778	-110.75	0.666666667
Carleton	488948.76	4923159.06	44.46165278	-93.13892222	1	N	MAH00073	2017	8	30	11	7.790277778	-132.75	1.802083333
Carleton	488948.76	4923159.06	44.46165278	-93.13892222	1	N	MAH00073	2017	8	30	11	9.011111111	-144.5	0.958333333
Carleton	488948.76	4923159.06	44.46165278	-93.13892222	1	P	MAH00073	2017	8	30	11	11.46805556	56.75	0.96875
Carleton	488948.76	4923159.06	44.46165278	-93.13892222	2	N	MAH00072	2017	8	30	9	56.30069444	26.5	1.979166667
Carleton	488948.76	4923159.06	44.46165278	-93.13892222	2	N	MAH00072	2017	8	30	9	59.35208333	13.5	1.916666667
Carleton	488948.76	4923159.06	44.46165278	-93.13892222	2	P	MAH00072	2017	8	30	10	10.70138889	-56.25	2.03125
Carleton	488948.76	4923159.06	44.46165278	-93.13892222	2	N	MAH00072	2017	8	30	10	11.60277778	-160.5	0.697916667
Carleton	488948.76	4923159.06	44.46165278	-93.13892222	3	P	MAH00071	2017	8	30	9	1.006944444	-59.25	0.84375
Carleton	488948.76	4923159.06	44.46165278	-93.13892222	3	N	MAH00071	2017	8	30	9	3.918055556	-139	0.552083333
Carleton	488948.76	4923159.06	44.46165278	-93.13892222	3	N	MAH00071	2017	8	30	9	5.177083333	-72.5	0.75
Carleton	488948.76	4923159.06	44.46165278	-93.13892222	3	N	MAH00071	2017	8	30	9	10.70138889	118.75	0.958333333
Carleton	488948.76	4923159.06	44.46165278	-93.13892222	3	N	MAH00071	2017	8	30	9	11.28541667	115	0.979166667
Carleton	488948.76	4923159.06	44.46165278	-93.13892222	3	N	MAH00071	2017	8	30	9	13.36597222	119.5	0.916666667
Carleton	488948.76	4923159.06	44.46165278	-93.13892222	3	N	MAH00071	2017	8	30	9	20.62083333	-112.25	0.84375
Carleton	488948.76	4923159.06	44.46165278	-93.13892222	3	N	MAH00071	2017	8	30	9	27.11527778	-160.25	0.739583333
Carleton	488948.76	4923159.06	44.46165278	-93.13892222	3	P	MAH00071	2017	8	30	9	27.86805556	134	0.958333333
Carleton	488948.76	4923159.06	44.46165278	-93.13892222	3	N	MAH00071	2017	8	30	9	31.15347222	-23.25	2.125
Carleton	488948.76	4923159.06	44.46165278	-93.13892222	3	P	MAH00071	2017	8	30	9	32.86875	-59.5	0.947916667
Carleton	488948.76	4923159.06	44.46165278	-93.13892222	3	N	MAH00071	2017	8	30	9	33.08402778	-33.25	2.354166667
Carleton	488948.76	4923159.06	44.46165278	-93.13892222	3	P	MAH00071	2017	8	30	9	39.64861111	123.75	0.875
Carleton	488948.76	4923159.06	44.46165278	-93.13892222	3	N	MAH00071	2017	8	30	9	39.83611111	113	0.864583333
Carleton	488948.76	4923159.06	44.46165278	-93.13892222	3	P	MAH00071	2017	8	30	9	41.45277778	-61.5	0.875
Carleton	488948.76	4923159.06	44.46165278	-93.13892222	1	N	MAH00075	2017	9	4	10	39.58402778	-112.75	2.291666667
Carleton	488948.76	4923159.06	44.46165278	-93.13892222	1	P	MAH00075	2017	9	4	10	40.46805556	40.5	0.65625
Carleton	488948.76	4923159.06	44.46165278	-93.13892222	1	N	MAH00075	2017	9	4	10	47.69513889	52	1.291666667
Carleton	488948.76	4923159.06	44.46165278	-93.13892222	1	P	MAH00075	2017	9	4	10	48.33263889	-112.75	0.989583333
Carleton	488948.76	4923159.06	44.46165278	-93.13892222	1	N	MAH00075	2017	9	4	10	48.45555556	-94.5	2.125
Carleton	488948.76	4923159.06	44.46165278	-93.13892222	1	P	MAH00075	2017	9	4	10	48.72430556	29.75	1.770833333
Carleton	488948.76	4923159.06	44.46165278	-93.13892222	1	N	MAH00075	2017	9	4	10	50.11944444	39.5	1.40625
Carleton	488948.76	4923159.06	44.46165278	-93.13892222	1	N	MAH00075	2017	9	4	10	50.35	-138.5	1.197916667
Carleton	488948.76	4923159.06	44.46165278	-93.13892222	1	P	MAH00075	2017	9	4	10	53.75625	-121	1.208333333
Carleton	488948.76	4923159.06	44.46165278	-93.13892222	1	N	MAH00075	2017	9	4	10	56.49791667	-105.5	0.96875
Carleton	488948.76	4923159.06	44.46165278	-93.13892222	1	P	MAH00075	2017	9	4	10	56.58611111	152	1.0625
Carleton	488948.76	4923159.06	44.46165278	-93.13892222	1	P	MAH00075	2017	9	4	10	56.78541667	58.25	1.083333333
Carleton	488948.76	4923159.06	44.46165278	-93.13892222	1	P	MAH00075	2017	9	4	11	9.313194444	123	1.15625
Carleton	488948.76	4923159.06	44.46165278	-93.13892222	1	P	MAH00075	2017	9	4	11	29.03472222	48.75	0.822916667
Carleton	488948.76	4923159.06	44.46165278	-93.13892222	1	N	MAH00078	2017	9	4	13	25.55902778	-20.5	1.072916667
Carleton	488948.76	4923159.06	44.46165278	-93.13892222	1	N	MAH00078	2017	9	4	13	25.82083333	-44.25	1.427083333
Carleton	488948.76	4923159.06	44.46165278	-93.13892222	1	P	MAH00078	2017	9	4	13	26.26041667	136.5	0.5625
Carleton	488948.76	4923159.06	44.46165278	-93.13892222	1	N	MAH00078	2017	9	4	13	30.57083333	146.25	0.739583333
Carleton	488948.76	4923159.06	44.46165278	-93.13892222	1	N	MAH00078	2017	9	4	13	32.35625	-171	1.03125
Carleton	488948.76	4923159.06	44.46165278	-93.13892222	1	N	MAH00078	2017	9	4	13	32.37222222	154.25	1.072916667
Carleton	488948.76	4923159.06	44.46165278	-93.13892222	1	N	MAH00078	2017	9	4	13	33.16944444	171.5	0.895833333
Carleton	488948.76	4923159.06	44.46165278	-93.13892222	1	N	MAH00078	2017	9	4	13	36.50972222	-8.25	1.072916667
Carleton	488948.76	4923159.06	44.46165278	-93.13892222	1	N	MAH00078	2017	9	4	13	37.38125	67	0.8125
Carleton	488948.76	4923159.06	44.46165278	-93.13892222	1	P	MAH00078	2017	9	4	13	37.7375	-33.5	1.614583333
Carleton	488948.76	4923159.06	44.46165278	-93.13892222	1	P	MAH00078	2017	9	4	13	46.22222222	113	0.708333333
Carleton	488948.76	4923159.06	44.46165278	-93.13892222	1	P	MAH00078	2017	9	4	13	54.41111111	108.25	0.822916667
Carleton	488948.76	4923159.06	44.46165278	-93.13892222	1	P	MAH00078	2017	9	4	13	56.39652778	76.5	0.864583333
Carleton	488948.76	4923159.06	44.46165278	-93.13892222	1	P	MAH00078	2017	9	4	14	2.1	165.75	1.03125
Carleton	488948.76	4923159.06	44.46165278	-93.13892222	1	P	MAH00078	2017	9	4	14	3.81875	17	0.802083333
Carleton	488948.76	4923159.06	44.46165278	-93.13892222	1	P	MAH00078	2017	9	4	14	8.734722222	14.5	0.75
Carleton	488948.76	4923159.06	44.46165278	-93.13892222	2	N	MAH00076	2017	9	4	11	35.17222222	28	1.572916667
Carleton	488948.76	4923159.06	44.46165278	-93.13892222	2	N	MAH00076	2017	9	4	11	35.66736111	151.75	0.75
Carleton	488948.76	4923159.06	44.46165278	-93.13892222	2	N	MAH00076	2017	9	4	11	35.85208333	-131.75	0.739583333
Carleton	488948.76	4923159.06	44.46165278	-93.13892222	2	N	MAH00076	2017	9	4	11	40.19930556	-25.5	1
Carleton	488948.76	4923159.06	44.46165278	-93.13892222	2	P	MAH00076	2017	9	4	11	48.21388889	78	0.375
Carleton	488948.76	4923159.06	44.46165278	-93.13892222	2	N	MAH00076	2017	9	4	11	52.94930556	-62.75	0.927083333
Carleton	488948.76	4923159.06	44.46165278	-93.13892222	2	P	MAH00076	2017	9	4	11	59.94930556	123.75	0.4375
Carleton	488948.76	4923159.06	44.46165278	-93.13892222	2	N	MAH00076	2017	9	4	12	2.705555556	-44	1.65625
Carleton	488948.76	4923159.06	44.46165278	-93.13892222	2	N	MAH00076	2017	9	4	12	6.209722222	-20.75	1.25
Carleton	488948.76	4923159.06	44.46165278	-93.13892222	2	N	MAH00076	2017	9	4	12	14.87569444	-64.25	3.364583333
Carleton	488948.76	4923159.06	44.46165278	-93.13892222	2	N	MAH00077	2017	9	4	12	46.14444444	-148.75	2.177083333
Carleton	488948.76	4923159.06	44.46165278	-93.13892222	2	N	MAH00077	2017	9	4	12	46.93194444	-46.25	1.552083333
Carleton	488948.76	4923159.06	44.46165278	-93.13892222	2	P	MAH00077	2017	9	4	13	5.099305556	79.75	1.90625
Carleton	488948.76	4923159.06	44.46165278	-93.13892222	2	N	MAH00077	2017	9	4	13	8.026388889	-61	1.760416667
Carleton	488948.76	4923159.06	44.46165278	-93.13892222	2	N	MAH00077	2017	9	4	13	9.084722222	-72.5	1.90625
Carleton	488948.76	4923159.06	44.46165278	-93.13892222	2	N	MAH00077	2017	9	4	13	11.85347222	-50.25	1.5625
Carleton	488948.76	4923159.06	44.46165278	-93.13892222	2	N	MAH00077	2017	9	4	13	14.85555556	-163.25	0.802083333
Carleton	488948.76	4923159.06	44.46165278	-93.13892222	2	N	MAH00077	2017	9	4	13	15.44583333	-39.25	1.458333333
Carleton	488948.76	4923159.06	44.46165278	-93.13892222	2	N	MAH00077	2017	9	4	13	21.44583333	-59.75	1.385416667
Carleton	488948.76	4923159.06	44.46165278	-93.13892222	3	N	MAH00074	2017	9	4	9	43.33055556	27	1.15625
Carleton	488948.76	4923159.06	44.46165278	-93.13892222	3	P	MAH00074	2017	9	4	9	43.4	148	1.479166667
Carleton	488948.76	4923159.06	44.46165278	-93.13892222	3	N	MAH00074	2017	9	4	9	44.35625	63.75	0.65625
Carleton	488948.76	4923159.06	44.46165278	-93.13892222	3	N	MAH00074	2017	9	4	9	46.12986111	-132.5	0.802083333
Carleton	488948.76	4923159.06	44.46165278	-93.13892222	3	P	MAH00074	2017	9	4	9	47.53819444	-78.25	2.427083333
Carleton	488948.76	4923159.06	44.46165278	-93.13892222	3	N	MAH00074	2017	9	4	9	59.24930556	54.25	1.020833333
Carleton	488948.76	4923159.06	44.46165278	-93.13892222	3	N	MAH00074	2017	9	4	10	2.513888889	-70.5	0.927083333
Carleton	488948.76	4923159.06	44.46165278	-93.13892222	3	N	MAH00074	2017	9	4	10	5.656944444	60	1
Carleton	488948.76	4923159.06	44.46165278	-93.13892222	3	N	MAH00074	2017	9	4	10	7.900694444	-101	1.479166667
Carleton	488948.76	4923159.06	44.46165278	-93.13892222	3	N	MAH00074	2017	9	4	10	9.101388889	51.75	0.489583333
Carleton	488948.76	4923159.06	44.46165278	-93.13892222	3	P	MAH00074	2017	9	4	10	31.66736111	120	0.958333333
Carleton	488948.76	4923159.06	44.46165278	-93.13892222	3	N	MAH00079	2017	9	4	14	17.34027778	-51	0.71875
Carleton	488948.76	4923159.06	44.46165278	-93.13892222	3	N	MAH00079	2017	9	4	14	17.42083333	-32	0.885416667
Carleton	488948.76	4923159.06	44.46165278	-93.13892222	3	P	MAH00079	2017	9	4	14	17.43819444	102.75	1
Carleton	488948.76	4923159.06	44.46165278	-93.13892222	3	N	MAH00079	2017	9	4	14	17.53125	121.25	0.708333333
Carleton	488948.76	4923159.06	44.46165278	-93.13892222	3	P	MAH00079	2017	9	4	14	18.09722222	117.75	0.864583333
Carleton	488948.76	4923159.06	44.46165278	-93.13892222	3	P	MAH00079	2017	9	4	14	18.1	-38.75	1.145833333
Carleton	488948.76	4923159.06	44.46165278	-93.13892222	3	N	MAH00079	2017	9	4	14	19.16180556	116.5	0.53125
Carleton	488948.76	4923159.06	44.46165278	-93.13892222	3	P	MAH00079	2017	9	4	14	19.84027778	109.25	0.791666667
Carleton	488948.76	4923159.06	44.46165278	-93.13892222	3	P	MAH00079	2017	9	4	14	21.84722222	-31.75	1.1875
Carleton	488948.76	4923159.06	44.46165278	-93.13892222	3	N	MAH00079	2017	9	4	14	24.33958333	95.25	0.510416667
Carleton	488948.76	4923159.06	44.46165278	-93.13892222	3	N	MAH00079	2017	9	4	14	26.71111111	58.5	3.34375
Carleton	488948.76	4923159.06	44.46165278	-93.13892222	3	N	MAH00079	2017	9	4	14	27.11111111	112.25	0.8125
Carleton	488948.76	4923159.06	44.46165278	-93.13892222	3	P	MAH00079	2017	9	4	14	30.43333333	99.75	0.458333333
Carleton	488948.76	4923159.06	44.46165278	-93.13892222	3	P	MAH00079	2017	9	4	14	30.63611111	116	0.71875
Carleton	488948.76	4923159.06	44.46165278	-93.13892222	3	P	MAH00079	2017	9	4	14	31.60208333	-24.75	0.802083333
Carleton	488948.76	4923159.06	44.46165278	-93.13892222	3	N	MAH00079	2017	9	4	14	32.37638889	75	0.802083333
Carleton	488948.76	4923159.06	44.46165278	-93.13892222	3	P	MAH00079	2017	9	4	14	38.42916667	-49.75	1.083333333
Carleton	488948.76	4923159.06	44.46165278	-93.13892222	3	N	MAH00079	2017	9	4	14	46.13819444	67.25	0.520833333
Carleton	488948.76	4923159.06	44.46165278	-93.13892222	3	P	MAH00079	2017	9	4	14	51.66805556	84.75	0.708333333
Carleton	488948.76	4923159.06	44.46165278	-93.13892222	3	N	MAH00079	2017	9	4	14	57.55486111	93	0.416666667
