# Supplementary material for: Do honey bee (Apis mellifera) foragers recruit their nestmates to native forbs in reconstructed prairie habitats?
Source: PLoS One. 2020 Feb 12;15(2):e0228169. doi: 10.1371/journal.pone.0228169 (PMC7015315; doi:10.1371/journal.pone.0228169)
Supplement: S3 Data — (CSV) [file pone.0228169.s003.csv]

nectar_dance_ID	waggle_runs_in_dance	simulated_points_in_prairies	simulated_points_out_of_prairies	proportion_in_prairie	month	season
1	6	287	713	0.287	8	Aug_Sept
2	6	8	992	0.008	5	May_June
3	6	19	981	0.019	5	May_June
4	6	80	920	0.08	8	Aug_Sept
6	6	56	944	0.056	5	May_June
7	6	534	466	0.534	8	Aug_Sept
8	6	893	107	0.893	8	Aug_Sept
9	6	967	33	0.967	8	Aug_Sept
10	6	789	211	0.789	6	May_June
11	6	13	987	0.013	5	May_June
12	6	1	999	0.001	6	May_June
13	6	0	1000	0	7	July
14	6	209	791	0.209	6	May_June
15	6	0	1000	0	6	May_June
16	6	63	937	0.063	6	May_June
17	6	0	1000	0	6	May_June
18	7	0	1000	0	8	Aug_Sept
19	7	0	1000	0	6	May_June
20	7	0	1000	0	6	May_June
21	7	0	1000	0	8	Aug_Sept
22	7	1	999	0.001	5	May_June
23	7	51	949	0.051	9	Aug_Sept
24	7	137	863	0.137	6	May_June
25	7	0	1000	0	8	Aug_Sept
27	7	0	1000	0	7	July
28	7	69	931	0.069	6	May_June
29	7	58	942	0.058	7	July
30	7	601	399	0.601	6	May_June
31	7	42	958	0.042	6	May_June
32	7	732	268	0.732	8	Aug_Sept
33	7	443	557	0.443	6	May_June
34	8	1	999	0.001	5	May_June
35	8	921	79	0.921	8	Aug_Sept
36	8	913	87	0.913	9	Aug_Sept
37	8	1	999	0.001	9	Aug_Sept
38	8	193	807	0.193	6	May_June
39	8	25	975	0.025	6	May_June
40	8	905	95	0.905	8	Aug_Sept
41	8	21	979	0.021	8	Aug_Sept
42	8	13	987	0.013	6	May_June
43	8	0	1000	0	6	May_June
44	9	34	966	0.034	9	Aug_Sept
45	9	185	815	0.185	8	Aug_Sept
46	9	0	1000	0	9	Aug_Sept
47	9	12	988	0.012	9	Aug_Sept
48	9	512	488	0.512	6	May_June
49	9	691	309	0.691	7	July
50	9	316	684	0.316	6	May_June
51	9	0	1000	0	6	May_June
52	9	1	999	0.001	7	July
53	9	114	886	0.114	7	July
54	10	0	1000	0	9	Aug_Sept
55	10	623	377	0.623	8	Aug_Sept
56	10	331	669	0.331	8	Aug_Sept
57	10	732	268	0.732	9	Aug_Sept
58	10	0	1000	0	8	Aug_Sept
59	10	67	933	0.067	9	Aug_Sept
60	10	0	1000	0	6	May_June
61	10	921	79	0.921	9	Aug_Sept
62	10	471	529	0.471	6	May_June
63	10	360	640	0.36	6	May_June
64	10	52	948	0.052	8	Aug_Sept
65	10	691	309	0.691	8	Aug_Sept
66	10	0	1000	0	6	May_June
67	10	2	998	0.002	7	July
68	11	0	1000	0	9	Aug_Sept
69	11	265	735	0.265	5	May_June
70	11	63	937	0.063	5	May_June
71	11	949	51	0.949	9	Aug_Sept
72	11	0	1000	0	6	May_June
73	11	792	208	0.792	7	July
74	11	0	1000	0	8	Aug_Sept
75	11	0	1000	0	6	May_June
76	11	0	1000	0	7	July
77	11	0	1000	0	6	May_June
78	11	232	768	0.232	7	July
79	11	0	1000	0	6	May_June
80	11	90	910	0.09	7	July
81	11	0	1000	0	8	Aug_Sept
82	11	0	1000	0	6	May_June
83	11	1	999	0.001	8	Aug_Sept
84	11	194	806	0.194	6	May_June
85	12	0	1000	0	9	Aug_Sept
86	12	203	797	0.203	9	Aug_Sept
87	12	229	771	0.229	5	May_June
88	12	184	816	0.184	5	May_June
89	12	4	996	0.004	6	May_June
90	12	0	1000	0	7	July
91	12	395	605	0.395	6	May_June
92	12	0	1000	0	6	May_June
93	12	4	996	0.004	7	July
94	12	357	643	0.357	8	Aug_Sept
95	12	437	563	0.437	7	July
96	12	90	910	0.09	7	July
97	12	907	93	0.907	7	July
98	12	0	1000	0	7	July
99	12	0	1000	0	6	May_June
100	13	691	309	0.691	8	Aug_Sept
101	13	0	1000	0	9	Aug_Sept
102	13	37	963	0.037	5	May_June
103	13	358	642	0.358	6	May_June
104	13	586	414	0.586	6	May_June
105	13	930	70	0.93	7	July
107	13	1	999	0.001	6	May_June
108	13	6	994	0.006	6	May_June
109	13	0	1000	0	7	July
110	13	738	262	0.738	8	Aug_Sept
111	13	223	777	0.223	7	July
112	13	82	918	0.082	7	July
113	13	0	1000	0	6	May_June
114	14	849	151	0.849	8	Aug_Sept
115	14	437	563	0.437	8	Aug_Sept
116	14	0	1000	0	5	May_June
117	14	476	524	0.476	7	July
118	14	0	1000	0	8	Aug_Sept
119	14	881	119	0.881	8	Aug_Sept
120	14	658	342	0.658	7	July
121	14	30	970	0.03	7	July
122	15	0	1000	0	6	May_June
123	15	0	1000	0	6	May_June
124	15	0	1000	0	6	May_June
125	15	18	982	0.018	7	July
126	15	362	638	0.362	7	July
127	15	590	410	0.59	8	Aug_Sept
128	15	0	1000	0	8	Aug_Sept
129	15	1	999	0.001	7	July
130	15	7	993	0.007	8	Aug_Sept
131	16	169	831	0.169	5	May_June
132	16	0	1000	0	8	Aug_Sept
133	16	851	149	0.851	6	May_June
134	16	25	975	0.025	7	July
135	16	0	1000	0	6	May_June
136	16	0	1000	0	6	May_June
137	16	0	1000	0	7	July
138	16	1	999	0.001	8	Aug_Sept
139	16	18	982	0.018	7	July
140	17	115	885	0.115	5	May_June
141	17	0	1000	0	6	May_June
142	17	500	500	0.5	7	July
143	17	496	504	0.496	6	May_June
145	17	0	1000	0	8	Aug_Sept
146	17	0	1000	0	6	May_June
147	17	268	732	0.268	7	July
148	17	0	1000	0	7	July
149	17	77	923	0.077	7	July
150	17	267	733	0.267	7	July
151	18	0	1000	0	7	July
152	18	0	1000	0	6	May_June
153	18	239	761	0.239	8	Aug_Sept
154	18	45	955	0.045	7	July
155	18	128	872	0.128	6	May_June
156	18	522	478	0.522	7	July
157	18	22	978	0.022	6	May_June
158	18	139	861	0.139	8	Aug_Sept
159	18	1	999	0.001	7	July
160	18	847	153	0.847	8	Aug_Sept
161	19	0	1000	0	9	Aug_Sept
162	19	9	991	0.009	5	May_June
163	19	431	569	0.431	8	Aug_Sept
164	19	584	416	0.584	7	July
166	19	458	542	0.458	6	May_June
167	19	3	997	0.003	6	May_June
168	19	945	55	0.945	8	Aug_Sept
169	19	462	538	0.462	7	July
170	19	912	88	0.912	6	May_June
171	19	4	996	0.004	7	July
172	19	154	846	0.154	6	May_June
173	19	16	984	0.016	6	May_June
174	20	0	1000	0	5	May_June
175	20	193	807	0.193	8	Aug_Sept
176	20	265	735	0.265	5	May_June
177	20	0	1000	0	6	May_June
178	20	386	614	0.386	8	Aug_Sept
179	20	0	1000	0	7	July
180	20	2	998	0.002	6	May_June
181	20	0	1000	0	6	May_June
182	20	238	762	0.238	6	May_June
183	20	14	986	0.014	7	July
184	20	841	159	0.841	8	Aug_Sept
185	20	294	706	0.294	6	May_June
186	21	0	1000	0	9	Aug_Sept
187	21	370	630	0.37	8	Aug_Sept
188	21	23	977	0.023	5	May_June
189	21	219	781	0.219	6	May_June
190	21	0	1000	0	9	Aug_Sept
191	21	89	911	0.089	7	July
192	21	0	1000	0	7	July
193	21	0	1000	0	7	July
194	21	79	921	0.079	7	July
195	21	543	457	0.543	7	July
196	21	268	732	0.268	7	July
197	22	614	386	0.614	8	Aug_Sept
198	22	16	984	0.016	5	May_June
199	22	640	360	0.64	9	Aug_Sept
200	22	0	1000	0	9	Aug_Sept
201	22	3	997	0.003	7	July
202	22	23	977	0.023	7	July
203	22	0	1000	0	8	Aug_Sept
204	22	696	304	0.696	8	Aug_Sept
205	23	535	465	0.535	8	Aug_Sept
206	23	179	821	0.179	6	May_June
207	23	699	301	0.699	6	May_June
208	23	723	277	0.723	9	Aug_Sept
209	23	33	967	0.033	6	May_June
210	23	0	1000	0	7	July
211	23	0	1000	0	6	May_June
212	23	2	998	0.002	7	July
213	23	0	1000	0	6	May_June
214	23	33	967	0.033	6	May_June
215	23	484	516	0.484	8	Aug_Sept
216	24	0	1000	0	7	July
218	24	498	502	0.498	7	July
219	24	0	1000	0	8	Aug_Sept
220	25	0	1000	0	5	May_June
221	25	17	983	0.017	5	May_June
222	25	0	1000	0	6	May_June
223	25	45	955	0.045	6	May_June
224	25	0	1000	0	7	July
225	25	273	727	0.273	6	May_June
226	26	357	643	0.357	9	Aug_Sept
227	26	0	1000	0	6	May_June
228	26	0	1000	0	7	July
229	26	222	778	0.222	6	May_June
230	26	784	216	0.784	6	May_June
231	26	134	866	0.134	7	July
232	26	79	921	0.079	6	May_June
233	27	238	762	0.238	8	Aug_Sept
234	27	0	1000	0	8	Aug_Sept
235	27	0	1000	0	5	May_June
236	27	12	988	0.012	6	May_June
237	27	0	1000	0	8	Aug_Sept
238	27	0	1000	0	7	July
239	28	63	937	0.063	6	May_June
240	28	201	799	0.201	6	May_June
241	28	850	150	0.85	7	July
242	29	23	977	0.023	8	Aug_Sept
243	29	884	116	0.884	7	July
244	29	0	1000	0	7	July
245	30	242	758	0.242	5	May_June
247	30	76	924	0.076	6	May_June
248	30	456	544	0.456	6	May_June
249	30	68	932	0.068	6	May_June
250	31	200	800	0.2	5	May_June
251	31	0	1000	0	7	July
252	31	0	1000	0	7	July
253	31	0	1000	0	7	July
254	31	433	567	0.433	7	July
255	31	0	1000	0	7	July
256	31	19	981	0.019	8	Aug_Sept
257	31	308	692	0.308	6	May_June
258	32	7	993	0.007	6	May_June
259	33	1	999	0.001	5	May_June
260	33	0	1000	0	6	May_June
261	33	9	991	0.009	7	July
262	33	634	366	0.634	6	May_June
263	33	777	223	0.777	6	May_June
264	34	841	159	0.841	9	Aug_Sept
265	34	38	962	0.038	6	May_June
266	35	616	384	0.616	6	May_June
267	35	0	1000	0	6	May_June
268	35	3	997	0.003	8	Aug_Sept
269	35	83	917	0.083	6	May_June
270	36	0	1000	0	6	May_June
271	36	559	441	0.559	6	May_June
272	36	703	297	0.703	8	Aug_Sept
273	37	0	1000	0	7	July
274	37	623	377	0.623	8	Aug_Sept
275	38	18	982	0.018	6	May_June
276	38	74	926	0.074	8	Aug_Sept
277	38	502	498	0.502	6	May_June
278	39	274	726	0.274	8	Aug_Sept
279	39	112	888	0.112	5	May_June
280	39	0	1000	0	8	Aug_Sept
281	39	0	1000	0	6	May_June
282	39	93	907	0.093	6	May_June
283	39	0	1000	0	7	July
284	39	584	416	0.584	6	May_June
285	39	46	954	0.046	8	Aug_Sept
286	39	18	982	0.018	6	May_June
287	40	0	1000	0	6	May_June
288	40	45	955	0.045	7	July
289	40	195	805	0.195	6	May_June
290	41	2	998	0.002	7	July
291	41	0	1000	0	6	May_June
292	41	6	994	0.006	6	May_June
293	41	191	809	0.191	7	July
294	41	885	115	0.885	7	July
295	42	790	210	0.79	8	Aug_Sept
296	42	61	939	0.061	5	May_June
297	42	10	990	0.01	6	May_June
298	43	1	999	0.001	7	July
299	43	2	998	0.002	7	July
300	43	641	359	0.641	8	Aug_Sept
301	43	215	785	0.215	7	July
302	44	0	1000	0	7	July
303	44	346	654	0.346	6	May_June
304	44	2	998	0.002	7	July
305	45	0	1000	0	6	May_June
306	45	13	987	0.013	8	Aug_Sept
307	46	906	94	0.906	8	Aug_Sept
308	46	119	881	0.119	7	July
309	47	39	961	0.039	8	Aug_Sept
310	47	0	1000	0	7	July
311	48	0	1000	0	9	Aug_Sept
312	48	606	394	0.606	8	Aug_Sept
313	48	1	999	0.001	7	July
314	50	357	643	0.357	7	July
315	51	1	999	0.001	7	July
316	51	94	906	0.094	7	July
317	52	652	348	0.652	8	Aug_Sept
318	52	0	1000	0	7	July
319	53	182	818	0.182	6	May_June
320	55	0	1000	0	7	July
321	56	0	1000	0	6	May_June
322	57	249	751	0.249	7	July
323	58	12	988	0.012	5	May_June
324	59	0	1000	0	6	May_June
325	59	984	16	0.984	7	July
326	59	17	983	0.017	7	July
327	60	0	1000	0	8	Aug_Sept
328	60	0	1000	0	6	May_June
329	61	436	564	0.436	7	July
330	62	4	996	0.004	8	Aug_Sept
331	62	272	728	0.272	8	Aug_Sept
332	63	429	571	0.429	6	May_June
333	63	758	242	0.758	6	May_June
334	64	0	1000	0	7	July
335	65	0	1000	0	5	May_June
336	65	184	816	0.184	6	May_June
337	65	58	942	0.058	7	July
338	66	0	1000	0	7	July
339	67	2	998	0.002	7	July
340	68	0	1000	0	7	July
341	73	0	1000	0	7	July
342	79	0	1000	0	6	May_June
343	81	0	1000	0	5	May_June
344	82	0	1000	0	6	May_June
345	84	559	441	0.559	7	July
346	87	177	823	0.177	6	May_June
347	89	0	1000	0	8	Aug_Sept
348	89	0	1000	0	8	Aug_Sept
349	92	11	989	0.011	7	July
350	93	0	1000	0	7	July
351	96	4	996	0.004	7	July
352	101	0	1000	0	7	July
353	103	0	1000	0	7	July
354	110	806	194	0.806	7	July
355	114	0	1000	0	7	July
356	126	917	83	0.917	8	Aug_Sept
357	128	9	991	0.009	6	May_June
358	128	937	63	0.937	8	Aug_Sept
359	148	4	996	0.004	5	May_June
