# Supplementary material for: Do honey bee (Apis mellifera) foragers recruit their nestmates to native forbs in reconstructed prairie habitats?
Source: PLoS One. 2020 Feb 12;15(2):e0228169. doi: 10.1371/journal.pone.0228169 (PMC7015315; doi:10.1371/journal.pone.0228169)
Supplement: S4 Data — (CSV) [file pone.0228169.s004.csv]

dance_id	pollen_nectar	site	year	month	day	waggle_run_duration_seconds	estimated_distance_meters	season
1	N	Belwin	2015	8	24	0.766666667	404.9148822	Aug_Sept
2	N	Belwin	2016	5	17	0.341666667	54.83250988	May_June
3	N	Belwin	2016	5	17	0.575	247.0345964	May_June
4	N	Belwin	2015	8	26	0.8	432.3723229	Aug_Sept
5	N	Belwin	2015	8	20	0.858333333	480.4228443	Aug_Sept
6	N	Belwin	2016	5	24	2.125	1523.805601	May_June
7	N	Belwin	2015	8	26	0.708333333	356.86436	Aug_Sept
8	N	Belwin	2015	8	26	0.816666667	446.1010437	Aug_Sept
9	N	Belwin	2015	8	24	1.016666667	610.8456895	Aug_Sept
10	N	Belwin	2016	6	1	1.275	823.6408567	May_June
11	N	Belwin	2016	5	17	0.341666667	54.83250988	May_June
12	N	Belwin	2015	6	29	1.766666667	1228.638111	May_June
13	N	Belwin	2015	7	20	1.541666667	1043.300385	July
14	N	Belwin	2016	6	15	1.558333333	1057.029105	May_June
15	N	Belwin	2016	6	15	2.691666667	1990.582098	May_June
16	N	Belwin	2016	6	24	2.108333333	1510.076881	May_June
17	N	Belwin	2015	6	29	4.766666667	3699.807798	May_June
18	N	Belwin	2015	8	24	2.4	1750.329489	Aug_Sept
19	N	Belwin	2016	6	1	3.983333333	3054.557935	May_June
20	N	Belwin	2016	6	1	4	3068.286656	May_June
21	N	Belwin	2015	8	26	1.491666667	1002.114223	Aug_Sept
22	N	Belwin	2016	5	24	0.516666667	198.984075	May_June
23	N	Belwin	2015	9	1	0.408333333	109.7473913	Aug_Sept
24	N	Belwin	2016	6	1	1.691666667	1166.858869	May_June
25	N	Belwin	2015	8	26	1.958333333	1386.518396	Aug_Sept
26	N	Belwin	2015	7	9	0.6	267.6276771	July
27	N	Belwin	2015	7	9	1.208333333	768.7259745	July
28	N	Belwin	2016	6	24	2.125	1523.805601	May_June
29	N	Belwin	2015	7	20	2.1	1503.212521	July
30	N	Belwin	2016	6	8	0.791666667	425.5079629	May_June
31	N	Belwin	2016	6	8	2.083333333	1489.4838	May_June
32	N	Belwin	2015	8	14	0.775	411.7792422	Aug_Sept
33	N	Belwin	2016	6	24	1.391666667	919.7419003	May_June
34	N	Belwin	2016	5	17	0.325	41.10378913	May_June
35	N	Belwin	2015	8	26	0.658333333	315.6781985	Aug_Sept
36	N	Belwin	2015	9	1	0.958333333	562.7951672	Aug_Sept
37	N	Belwin	2015	9	1	2.116666667	1516.941241	Aug_Sept
38	N	Belwin	2016	6	1	1.491666667	1002.114223	May_June
39	N	Belwin	2016	6	8	1.95	1379.654036	May_June
40	N	Belwin	2015	8	20	0.666666667	322.5425593	Aug_Sept
41	N	Belwin	2015	8	7	1.425	947.199341	Aug_Sept
42	N	Belwin	2016	6	24	1.95	1379.654036	May_June
43	N	Belwin	2015	6	29	0.958333333	562.7951672	May_June
44	N	Belwin	2015	9	1	2.158333333	1551.263042	Aug_Sept
45	N	Belwin	2015	8	26	0.533333333	212.7127949	Aug_Sept
46	N	Belwin	2015	9	1	1.708333333	1180.587589	Aug_Sept
47	N	Belwin	2015	9	1	1.966666667	1393.382757	Aug_Sept
48	N	Belwin	2016	6	24	1.25	803.0477759	May_June
49	N	Belwin	2015	7	20	1.025	617.7100494	July
50	N	Belwin	2015	6	29	1.475	988.3855025	May_June
51	N	Belwin	2016	6	15	2.466666667	1805.244371	May_June
52	N	Belwin	2015	7	15	1.441666667	960.9280618	July
53	N	Belwin	2015	7	9	1.241666667	796.183416	July
54	N	Belwin	2015	9	1	1.083333333	665.7605708	Aug_Sept
55	N	Belwin	2015	8	26	0.758333333	398.0505214	Aug_Sept
56	N	Belwin	2015	8	26	0.666666667	322.5425593	Aug_Sept
57	N	Belwin	2015	9	1	0.841666667	466.6941244	Aug_Sept
58	N	Belwin	2015	8	26	0.858333333	480.4228443	Aug_Sept
59	N	Belwin	2015	9	1	0.741666667	384.3218015	Aug_Sept
60	N	Belwin	2016	6	1	2.841666667	2114.140582	May_June
61	N	Belwin	2015	9	1	0.775	411.7792422	Aug_Sept
62	N	Belwin	2016	6	24	1.516666667	1022.707304	May_June
63	N	Belwin	2016	6	8	0.65	308.8138386	May_June
64	N	Belwin	2015	8	7	0.466666667	157.7979135	Aug_Sept
65	N	Belwin	2015	8	7	1.158333333	727.539813	Aug_Sept
66	N	Belwin	2016	6	8	2.433333333	1777.78693	May_June
67	N	Belwin	2015	7	15	2.141666667	1537.534322	July
68	N	Belwin	2015	9	1	2.116666667	1516.941241	Aug_Sept
69	N	Belwin	2016	5	17	0.666666667	322.5425593	May_June
70	N	Belwin	2016	5	17	2.066666667	1475.75508	May_June
71	N	Belwin	2015	9	1	1.083333333	665.7605708	Aug_Sept
72	N	Belwin	2016	6	15	0.558333333	233.3058756	May_June
73	N	Belwin	2015	7	9	0.566666667	240.1702364	July
74	N	Belwin	2015	8	14	1.791666667	1249.231192	Aug_Sept
75	N	Belwin	2016	6	8	0.4	102.8830313	May_June
76	N	Belwin	2015	7	31	2.191666667	1578.720484	July
77	N	Belwin	2016	6	1	2.883333333	2148.462383	May_June
78	N	Belwin	2015	7	15	1.416666667	940.3349811	July
79	N	Belwin	2016	6	24	2.4	1750.329489	May_June
80	N	Belwin	2015	7	15	0.891666667	507.8802858	July
81	N	Belwin	2015	8	7	1.475	988.3855025	Aug_Sept
82	N	Belwin	2016	6	24	2.283333333	1654.228446	May_June
83	N	Belwin	2015	8	14	0.2	-61.8616145	Aug_Sept
84	N	Belwin	2016	6	24	2	1420.840198	May_June
85	N	Belwin	2015	9	1	1.366666667	899.1488196	Aug_Sept
86	N	Belwin	2015	9	1	0.6	267.6276771	Aug_Sept
87	N	Belwin	2016	5	17	1.4	926.6062603	May_June
88	N	Belwin	2016	5	17	0.283333333	6.781987644	May_June
89	N	Belwin	2016	6	1	2.116666667	1516.941241	May_June
90	N	Belwin	2015	7	15	0.525	205.8484349	July
91	N	Belwin	2015	6	29	1.9	1338.467875	May_June
92	N	Belwin	2016	6	15	2.475	1812.108731	May_June
93	N	Belwin	2015	7	20	1.791666667	1249.231192	July
94	N	Belwin	2015	8	14	0.691666667	343.13564	Aug_Sept
95	N	Belwin	2015	7	20	1.825	1276.688633	July
96	N	Belwin	2015	7	9	2.008333333	1427.704558	July
97	N	Belwin	2015	7	9	1.058333333	645.1674901	July
98	N	Belwin	2015	7	15	5.616666667	4399.972543	July
99	N	Belwin	2015	6	29	4.691666667	3638.028556	May_June
100	N	Belwin	2015	8	26	0.791666667	425.5079629	Aug_Sept
101	N	Belwin	2015	9	1	1.516666667	1022.707304	Aug_Sept
102	N	Belwin	2016	5	17	1.616666667	1105.079627	May_June
103	N	Belwin	2016	6	1	1.533333333	1036.436024	May_June
104	N	Belwin	2016	6	1	1.316666667	857.9626582	May_June
105	N	Belwin	2015	7	20	0.975	576.523888	July
106	N	Belwin	2015	8	7	0.483333333	171.5266334	Aug_Sept
107	N	Belwin	2015	6	29	1.675	1153.130148	May_June
108	N	Belwin	2016	6	8	0.95	555.9308072	May_June
109	N	Belwin	2015	7	20	1.741666667	1208.04503	July
110	N	Belwin	2015	8	14	0.866666667	487.2872051	Aug_Sept
111	N	Belwin	2015	7	9	1.75	1214.90939	July
112	N	Belwin	2015	7	31	0.791666667	425.5079629	July
113	N	Belwin	2016	6	8	6.191666667	4873.6134	May_June
114	N	Belwin	2015	8	24	0.941666667	549.0664473	Aug_Sept
115	N	Belwin	2015	8	24	1.091666667	672.6249316	Aug_Sept
116	N	Belwin	2016	5	24	0.616666667	281.3563979	May_June
117	N	Belwin	2015	7	20	0.591666667	260.7633171	July
118	N	Belwin	2015	8	14	0.7	350	Aug_Sept
119	N	Belwin	2015	8	14	0.908333333	521.6090058	Aug_Sept
120	N	Belwin	2015	7	31	0.75	391.1861614	July
121	N	Belwin	2015	7	15	1.541666667	1043.300385	July
122	N	Belwin	2016	6	1	1.15	720.675453	May_June
123	N	Belwin	2016	6	15	1.833333333	1283.552993	May_June
124	N	Belwin	2016	6	15	1.666666667	1146.265788	May_June
125	N	Belwin	2015	7	31	1.508333333	1015.842943	July
126	N	Belwin	2015	7	15	1.916666667	1352.196596	July
127	N	Belwin	2015	8	14	0.75	391.1861614	Aug_Sept
128	N	Belwin	2015	8	7	1.275	823.6408567	Aug_Sept
129	N	Belwin	2015	7	15	2.05	1462.026359	July
130	N	Belwin	2015	8	7	0.716666667	363.7287208	Aug_Sept
131	N	Belwin	2016	5	17	0.358333333	68.56122982	May_June
132	N	Belwin	2015	8	26	2.075	1482.61944	Aug_Sept
133	N	Belwin	2016	6	24	0.591666667	260.7633171	May_June
134	N	Belwin	2015	7	31	0.375	82.28995058	July
135	N	Belwin	2016	6	8	2.458333333	1798.380011	May_June
136	N	Belwin	2016	6	8	2.283333333	1654.228446	May_June
137	N	Belwin	2015	7	20	1.466666667	981.5211425	July
138	N	Belwin	2015	8	20	0.766666667	404.9148822	Aug_Sept
139	N	Belwin	2015	7	15	2.15	1544.398682	July
140	N	Belwin	2016	5	17	1.408333333	933.4706203	May_June
141	N	Belwin	2016	6	1	3.1	2326.93575	May_June
142	N	Belwin	2015	7	15	1.733333333	1201.18067	July
143	N	Belwin	2016	6	15	1.158333333	727.539813	May_June
144	N	Belwin	2015	8	7	1.466666667	981.5211425	Aug_Sept
145	N	Belwin	2015	8	14	0.758333333	398.0505214	Aug_Sept
146	N	Belwin	2016	6	15	2.858333333	2127.869302	May_June
147	N	Belwin	2015	7	15	1.25	803.0477759	July
148	N	Belwin	2015	7	20	2.25	1626.771005	July
149	N	Belwin	2015	7	20	1.675	1153.130148	July
150	N	Belwin	2015	7	15	1.475	988.3855025	July
151	N	Belwin	2015	7	31	0.666666667	322.5425593	July
152	N	Belwin	2016	6	15	2.808333333	2086.683141	May_June
153	N	Belwin	2015	8	7	0.616666667	281.3563979	Aug_Sept
154	N	Belwin	2015	7	9	0.8	432.3723229	July
155	N	Belwin	2015	6	29	1.908333333	1345.332235	May_June
156	N	Belwin	2015	7	15	1.616666667	1105.079627	July
157	N	Belwin	2015	6	29	0.416666667	116.6117521	May_June
158	N	Belwin	2015	8	14	0.591666667	260.7633171	Aug_Sept
159	N	Belwin	2015	7	20	1.175	741.2685338	July
160	N	Belwin	2015	8	14	0.891666667	507.8802858	Aug_Sept
161	N	Belwin	2015	9	1	1.691666667	1166.858869	Aug_Sept
162	N	Belwin	2016	5	17	0.4	102.8830313	May_June
163	N	Belwin	2015	8	20	0.691666667	343.13564	Aug_Sept
164	N	Belwin	2015	7	9	0.933333333	542.2020865	July
165	N	Belwin	2016	6	8	0.566666667	240.1702364	May_June
166	N	Belwin	2016	6	15	1.116666667	693.2180124	May_June
167	N	Belwin	2016	6	8	2.116666667	1516.941241	May_June
168	N	Belwin	2015	8	14	1.083333333	665.7605708	Aug_Sept
169	N	Belwin	2015	7	15	1.733333333	1201.18067	July
170	N	Belwin	2016	6	15	1.3	844.2339374	May_June
171	N	Belwin	2015	7	20	1.825	1276.688633	July
172	N	Belwin	2016	6	24	1.65	1132.537068	May_June
173	N	Belwin	2016	6	8	0.433333333	130.340472	May_June
174	N	Belwin	2016	5	24	2.483333333	1818.973091	May_June
175	N	Belwin	2015	8	20	0.591666667	260.7633171	Aug_Sept
176	N	Belwin	2016	5	24	0.358333333	68.56122982	May_June
177	N	Belwin	2016	6	1	3.425	2594.645799	May_June
178	N	Belwin	2015	8	20	1.266666667	816.7764967	Aug_Sept
179	N	Belwin	2015	7	31	0.95	555.9308072	July
180	N	Belwin	2016	6	8	0.633333333	295.0851178	May_June
181	N	Belwin	2016	6	24	1.925	1359.060956	May_June
182	N	Belwin	2016	6	15	1.375	906.0131796	May_June
183	N	Belwin	2015	7	15	2	1420.840198	July
184	N	Belwin	2015	8	14	1.008333333	603.9813287	Aug_Sept
185	N	Belwin	2016	6	15	1.641666667	1125.672708	May_June
186	N	Belwin	2015	9	1	1.85	1297.281713	Aug_Sept
187	N	Belwin	2015	8	26	1.016666667	610.8456895	Aug_Sept
188	N	Belwin	2016	5	24	1.033333333	624.5744094	May_June
189	N	Belwin	2016	6	1	1.783333333	1242.366831	May_June
190	N	Belwin	2015	9	1	3.733333333	2848.627128	Aug_Sept
191	N	Belwin	2015	7	20	1.85	1297.281713	July
192	N	Belwin	2015	7	15	1.675	1153.130148	July
193	N	Belwin	2015	7	31	1.925	1359.060956	July
194	N	Belwin	2015	7	31	0.8	432.3723229	July
195	N	Belwin	2015	7	15	1.125	700.0823723	July
196	N	Belwin	2015	7	20	1.866666667	1311.010434	July
197	N	Belwin	2015	8	26	0.75	391.1861614	Aug_Sept
198	N	Belwin	2016	5	17	0.791666667	425.5079629	May_June
199	N	Belwin	2015	9	1	1.033333333	624.5744094	Aug_Sept
200	N	Belwin	2015	9	1	1.108333333	686.3536516	Aug_Sept
201	N	Belwin	2015	7	31	2.2	1585.584843	July
202	N	Belwin	2015	7	31	0.933333333	542.2020865	July
203	N	Belwin	2015	8	7	0.875	494.1515651	Aug_Sept
204	N	Belwin	2015	8	14	0.8	432.3723229	Aug_Sept
205	N	Belwin	2015	8	24	0.775	411.7792422	Aug_Sept
206	N	Belwin	2016	6	1	1.8	1256.095552	May_June
207	N	Belwin	2016	6	1	1.283333333	830.5052166	May_June
208	N	Belwin	2015	9	1	0.775	411.7792422	Aug_Sept
209	N	Belwin	2016	6	8	2	1420.840198	May_June
210	P	Belwin	2016	6	15	0.958333333	562.7951672	May_June
211	N	Belwin	2015	7	9	0.958333333	562.7951672	July
212	N	Belwin	2016	6	8	3.508333333	2663.289401	May_June
213	N	Belwin	2015	7	20	1.633333333	1118.808347	July
214	N	Belwin	2016	6	24	2.591666667	1908.209775	May_June
215	N	Belwin	2016	6	8	0.458333333	150.9335527	May_June
216	N	Belwin	2015	8	7	1.033333333	624.5744094	Aug_Sept
217	P	Belwin	2016	6	15	1.741666667	1208.04503	May_June
218	N	Belwin	2015	7	31	1.433333333	954.063701	July
219	N	Belwin	2015	8	7	0.75	391.1861614	Aug_Sept
220	N	Belwin	2015	7	15	1.775	1235.502471	July
221	N	Belwin	2015	8	7	1.875	1317.874794	Aug_Sept
222	N	Belwin	2016	5	17	0.85	473.5584843	May_June
223	N	Belwin	2016	5	17	0.333333333	47.96814909	May_June
224	N	Belwin	2016	6	15	2.7	1997.446458	May_June
225	N	Belwin	2016	6	8	0.633333333	295.0851178	May_June
226	N	Belwin	2015	7	9	1.141666667	713.8110931	July
227	P	Belwin	2015	7	9	1.533333333	1036.436024	July
228	N	Belwin	2016	6	15	1.25	803.0477759	May_June
229	N	Belwin	2015	9	1	0.383333333	89.15431054	Aug_Sept
230	N	Belwin	2016	6	15	2.3	1667.957166	May_June
231	N	Belwin	2015	7	20	1.6	1091.350906	July
232	N	Belwin	2015	6	29	1.958333333	1386.518396	May_June
233	N	Belwin	2016	6	15	1.158333333	727.539813	May_June
234	N	Belwin	2015	7	31	0.65	308.8138386	July
235	N	Belwin	2016	6	24	1.641666667	1125.672708	May_June
236	N	Belwin	2015	8	24	0.608333333	274.4920371	Aug_Sept
237	N	Belwin	2015	8	24	2.766666667	2052.36134	Aug_Sept
238	N	Belwin	2016	5	24	0.716666667	363.7287208	May_June
239	N	Belwin	2016	6	15	1.85	1297.281713	May_June
240	N	Belwin	2015	8	7	2.666666667	1969.989017	Aug_Sept
241	N	Belwin	2015	7	20	1.883333333	1324.739154	July
242	N	Belwin	2016	6	8	0.6	267.6276771	May_June
243	N	Belwin	2015	6	29	1.125	700.0823723	May_June
244	N	Belwin	2015	7	31	1.125	700.0823723	July
245	N	Belwin	2015	8	26	0.733333333	377.4574407	Aug_Sept
246	N	Belwin	2015	7	9	0.616666667	281.3563979	July
247	N	Belwin	2015	7	20	1.966666667	1393.382757	July
248	N	Belwin	2016	5	24	1.45	967.7924217	May_June
249	N	Belwin	2015	7	31	1.725	1194.31631	July
250	N	Belwin	2015	6	29	1.458333333	974.6567817	May_June
251	N	Belwin	2016	6	8	1.641666667	1125.672708	May_June
252	N	Belwin	2016	6	15	1.033333333	624.5744094	May_June
253	N	Belwin	2016	5	17	0.616666667	281.3563979	May_June
254	N	Belwin	2015	7	9	1.208333333	768.7259745	July
255	N	Belwin	2015	7	9	1.083333333	665.7605708	July
256	N	Belwin	2015	7	15	1.05	638.3031301	July
257	N	Belwin	2015	7	15	1.341666667	878.5557389	July
258	N	Belwin	2015	7	20	2.058333333	1468.890719	July
259	N	Belwin	2015	8	7	0.391666667	96.01867133	Aug_Sept
260	N	Belwin	2016	6	24	1.433333333	954.063701	May_June
261	N	Belwin	2015	6	29	2.2	1585.584843	May_June
262	N	Belwin	2016	5	17	0.358333333	68.56122982	May_June
263	N	Belwin	2016	6	15	1.341666667	878.5557389	May_June
264	N	Belwin	2015	7	31	1.85	1297.281713	July
265	N	Belwin	2016	6	15	1.4	926.6062603	May_June
266	N	Belwin	2016	6	1	1.458333333	974.6567817	May_June
267	N	Belwin	2015	9	1	1.116666667	693.2180124	Aug_Sept
268	N	Belwin	2016	6	8	0.666666667	322.5425593	May_June
269	N	Belwin	2016	6	15	1.691666667	1166.858869	May_June
270	N	Belwin	2016	6	8	2.75	2038.632619	May_June
271	N	Belwin	2015	8	7	1.05	638.3031301	Aug_Sept
272	N	Belwin	2016	6	24	1.683333333	1159.994508	May_June
273	N	Belwin	2016	6	24	3.508333333	2663.289401	May_June
274	N	Belwin	2015	6	29	1.075	658.8962109	May_June
275	N	Belwin	2015	8	14	0.877777778	496.4396853	Aug_Sept
276	N	Belwin	2015	7	9	1.658333333	1139.401428	July
277	N	Belwin	2015	8	14	0.766666667	404.9148822	Aug_Sept
278	N	Belwin	2016	6	8	2.841666667	2114.140582	May_June
279	N	Belwin	2015	8	14	1.383333333	912.8775395	Aug_Sept
280	N	Belwin	2016	6	24	1.35	885.4200988	May_June
281	N	Belwin	2015	8	26	0.625	288.2207578	Aug_Sept
282	N	Belwin	2016	5	17	0.341666667	54.83250988	May_June
283	N	Belwin	2015	8	14	0.933333333	542.2020865	Aug_Sept
284	N	Belwin	2016	6	15	1.925	1359.060956	May_June
285	N	Belwin	2015	6	29	0.875	494.1515651	May_June
286	N	Belwin	2015	7	9	1.841666667	1290.417353	July
287	N	Belwin	2016	6	8	1.683333333	1159.994508	May_June
288	N	Belwin	2015	8	7	1.333333333	871.6913781	Aug_Sept
289	N	Belwin	2016	6	24	1.716666667	1187.45195	May_June
290	N	Belwin	2016	6	24	2.558333333	1880.752334	May_June
291	N	Belwin	2015	7	9	0.891666667	507.8802858	July
292	N	Belwin	2016	6	8	0.766666667	404.9148822	May_June
293	N	Belwin	2015	7	9	0.333333333	47.96814909	July
294	N	Belwin	2016	6	8	1.091666667	672.6249316	May_June
295	N	Belwin	2016	6	24	0.558333333	233.3058756	May_June
296	N	Belwin	2015	7	31	0.608333333	274.4920371	July
297	N	Belwin	2015	7	31	1.125	700.0823723	July
298	N	Belwin	2015	8	26	0.925	535.3377265	Aug_Sept
299	N	Belwin	2016	5	17	1.416666667	940.3349811	May_June
300	N	Belwin	2016	6	15	2.258333333	1633.635365	May_June
301	N	Belwin	2015	7	9	1.208333333	768.7259745	July
302	N	Belwin	2015	7	20	1.375	906.0131796	July
303	N	Belwin	2015	8	14	0.783333333	418.6436021	Aug_Sept
304	N	Belwin	2015	7	20	0.65	308.8138386	July
305	N	Belwin	2015	7	31	2.175	1564.991763	July
306	N	Belwin	2016	6	15	1.583333333	1077.622185	May_June
307	N	Belwin	2015	7	20	2.45	1791.515651	July
308	N	Belwin	2015	6	29	1.608333333	1098.215266	May_June
309	N	Belwin	2015	8	7	0.941666667	549.0664473	Aug_Sept
310	N	Belwin	2015	8	7	0.625	288.2207578	Aug_Sept
311	N	Belwin	2015	7	9	1.275	823.6408567	July
312	N	Belwin	2015	8	14	1.658333333	1139.401428	Aug_Sept
313	N	Belwin	2015	7	9	1.141666667	713.8110931	July
314	N	Belwin	2015	9	1	1.158333333	727.539813	Aug_Sept
315	N	Belwin	2015	8	26	0.658333333	315.6781985	Aug_Sept
316	N	Belwin	2015	7	31	1.775	1235.502471	July
317	N	Belwin	2015	7	20	1.8	1256.095552	July
318	N	Belwin	2015	7	9	1.075	658.8962109	July
319	N	Belwin	2015	7	31	0.516666667	198.984075	July
320	N	Belwin	2015	8	7	0.5	185.2553542	Aug_Sept
321	N	Belwin	2015	7	31	1.533333333	1036.436024	July
322	N	Belwin	2015	6	29	1.375	906.0131796	May_June
323	N	Belwin	2015	7	9	1.766666667	1228.638111	July
324	N	Belwin	2016	6	8	2.9	2162.191104	May_June
325	N	Belwin	2015	7	15	1.191666667	754.9972545	July
326	N	Belwin	2016	5	17	1.2	761.8616145	May_June
327	N	Belwin	2016	6	15	2.275	1647.364086	May_June
328	N	Belwin	2015	7	31	1.133333333	706.9467323	July
329	N	Belwin	2015	7	20	1.641666667	1125.672708	July
330	N	Belwin	2015	8	14	0.9	514.7446458	Aug_Sept
331	N	Belwin	2016	6	1	2.958333333	2210.241625	May_June
332	N	Belwin	2015	7	15	1.508333333	1015.842943	July
333	N	Belwin	2015	8	14	2	1420.840198	Aug_Sept
334	N	Belwin	2015	8	14	0.641666667	301.9494786	Aug_Sept
335	N	Belwin	2015	6	29	0.708333333	356.86436	May_June
336	N	Belwin	2016	6	15	1.058333333	645.1674901	May_June
337	N	Belwin	2015	7	9	0.966666667	569.659528	July
338	N	Belwin	2016	5	24	4.108333333	3157.523339	May_June
339	N	Belwin	2016	6	15	1.116666667	693.2180124	May_June
340	N	Belwin	2015	7	15	0.433333333	130.340472	July
341	N	Belwin	2015	7	9	1.191666667	754.9972545	July
342	N	Belwin	2015	7	20	0.625	288.2207578	July
343	N	Belwin	2015	7	31	1.233333333	789.3190552	July
344	N	Belwin	2015	7	9	1.4	926.6062603	July
345	N	Belwin	2016	6	24	1.458333333	974.6567817	May_June
346	N	Belwin	2016	5	17	1.075	658.8962109	May_June
347	N	Belwin	2016	6	24	0.775	411.7792422	May_June
348	N	Belwin	2015	7	31	1.508333333	1015.842943	July
349	N	Belwin	2016	6	24	0.583333333	253.8989563	May_June
350	N	Belwin	2015	8	7	1.916666667	1352.196596	Aug_Sept
351	N	Belwin	2015	8	7	1.825	1276.688633	Aug_Sept
352	N	Belwin	2015	7	15	1.583333333	1077.622185	July
353	N	Belwin	2015	7	31	1.475	988.3855025	July
354	N	Belwin	2015	7	31	1.883333333	1324.739154	July
355	N	Belwin	2015	7	15	1.583333333	1077.622185	July
356	N	Belwin	2015	7	31	1.383333333	912.8775395	July
357	N	Belwin	2015	7	9	1.041666667	631.4387702	July
358	N	Belwin	2015	7	20	1.908333333	1345.332235	July
359	N	Belwin	2015	8	7	0.958333333	562.7951672	Aug_Sept
360	N	Belwin	2016	6	8	0.816666667	446.1010437	May_June
361	N	Belwin	2015	8	7	1.05	638.3031301	Aug_Sept
362	N	Belwin	2016	5	24	0.991666667	590.2526087	May_June
363	P	Belwin	2015	7	20	1.175	741.2685338	July
364	P	Belwin	2016	5	17	0.433333333	130.340472	May_June
365	P	Belwin	2016	5	17	0.366666667	75.42559061	May_June
366	P	Belwin	2015	8	26	0.416666667	116.6117521	Aug_Sept
367	P	Belwin	2015	8	26	0.691666667	343.13564	Aug_Sept
368	P	Belwin	2015	9	1	1.025	617.7100494	Aug_Sept
369	P	Belwin	2015	7	9	0.4	102.8830313	July
370	P	Belwin	2015	6	29	2.241666667	1619.906645	May_June
371	P	Belwin	2015	8	7	1.525	1029.571664	Aug_Sept
372	P	Belwin	2015	7	9	2.183333333	1571.856123	July
373	N	Belwin	2016	5	17	0.983333333	583.3882479	May_June
374	P	Belwin	2015	9	1	0.933333333	542.2020865	Aug_Sept
375	P	Belwin	2016	5	24	0.458333333	150.9335527	May_June
376	N	Belwin	2015	8	24	1.925	1359.060956	Aug_Sept
377	P	Belwin	2015	9	1	0.466666667	157.7979135	Aug_Sept
378	P	Belwin	2015	7	9	0.333333333	47.96814909	July
379	P	Belwin	2015	7	31	1.383333333	912.8775395	July
380	P	Belwin	2015	6	29	2.35	1709.143328	May_June
381	P	Belwin	2015	7	9	1.716666667	1187.45195	July
382	P	Belwin	2016	6	24	1.841666667	1290.417353	May_June
383	P	Belwin	2016	6	24	2.766666667	2052.36134	May_June
384	P	Belwin	2016	6	1	1.741666667	1208.04503	May_June
385	P	Belwin	2016	5	17	0.383333333	89.15431054	May_June
386	P	Belwin	2015	8	26	1.566666667	1063.893465	Aug_Sept
387	P	Belwin	2015	7	15	1.991666667	1413.975838	July
388	P	Belwin	2015	7	31	1.758333333	1221.77375	July
389	N	Belwin	2015	6	29	1.941666667	1372.789676	May_June
390	N	Belwin	2015	6	29	2.158333333	1551.263042	May_June
391	P	Belwin	2015	8	14	0.45	144.0691928	Aug_Sept
392	P	Belwin	2015	8	14	0.955555556	560.5070478	Aug_Sept
393	P	Belwin	2015	7	9	1.366666667	899.1488196	July
394	P	Belwin	2016	6	24	2.566666667	1887.616694	May_June
395	P	Belwin	2015	6	29	0.858333333	480.4228443	May_June
396	P	Belwin	2015	8	20	0.633333333	295.0851178	Aug_Sept
397	P	Belwin	2015	7	15	3.775	2882.948929	July
398	P	Belwin	2015	7	15	1.525	1029.571664	July
399	N	Belwin	2016	6	8	0.791666667	425.5079629	May_June
400	P	Belwin	2015	8	7	2.075	1482.61944	Aug_Sept
401	P	Belwin	2015	7	20	1.8	1256.095552	July
402	N	Belwin	2015	6	29	0.975	576.523888	May_June
403	P	Belwin	2016	5	17	0.325	41.10378913	May_June
404	P	Belwin	2016	5	17	0.375	82.28995058	May_June
405	P	Belwin	2015	6	29	1.508333333	1015.842943	May_June
406	P	Belwin	2015	8	7	1.775	1235.502471	Aug_Sept
407	P	Belwin	2016	6	8	2.475	1812.108731	May_June
408	P	Belwin	2015	7	9	1.766666667	1228.638111	July
409	P	Belwin	2015	8	14	0.841666667	466.6941244	Aug_Sept
410	N	Belwin	2015	9	1	2.083333333	1489.4838	Aug_Sept
411	N	Belwin	2015	6	29	2.366666667	1722.872049	May_June
412	N	Belwin	2015	6	29	1.783333333	1242.366831	May_June
413	N	Belwin	2015	8	14	0.908333333	521.6090058	Aug_Sept
414	P	Belwin	2015	7	9	1.8	1256.095552	July
415	N	Belwin	2016	6	15	1.3	844.2339374	May_June
416	P	Belwin	2015	7	15	0.633333333	295.0851178	July
417	P	Belwin	2015	9	1	1.05	638.3031301	Aug_Sept
418	N	Belwin	2015	8	26	0.825	452.9654036	Aug_Sept
419	N	Belwin	2015	9	1	2.216666667	1599.313564	Aug_Sept
420	P	Belwin	2015	7	15	1.766666667	1228.638111	July
421	P	Belwin	2015	6	29	2.566666667	1887.616694	May_June
422	P	Belwin	2015	8	14	1.466666667	981.5211425	Aug_Sept
423	N	Belwin	2015	7	31	0.8	432.3723229	July
424	P	Belwin	2015	8	26	0.525	205.8484349	Aug_Sept
425	P	Belwin	2015	9	1	1.275	823.6408567	Aug_Sept
426	N	Belwin	2015	8	14	3.8	2903.54201	Aug_Sept
427	P	Belwin	2015	6	29	2.183333333	1571.856123	May_June
428	N	Belwin	2015	6	29	2.375	1729.736409	May_June
429	N	Belwin	2015	7	15	1.858333333	1304.146073	July
430	N	Belwin	2015	7	9	2.091666667	1496.348161	July
431	P	Belwin	2016	5	17	0.675	329.4069193	May_June
432	N	Belwin	2015	6	29	1.583333333	1077.622185	May_June
433	P	Belwin	2015	8	14	1.425	947.199341	Aug_Sept
434	P	Belwin	2016	6	8	6.458333333	5093.272927	May_June
435	N	Belwin	2015	7	20	1.966666667	1393.382757	July
436	P	Belwin	2015	8	14	0.625	288.2207578	Aug_Sept
437	P	Belwin	2015	7	9	1.733333333	1201.18067	July
438	P	Belwin	2015	9	1	1.608333333	1098.215266	Aug_Sept
439	P	Belwin	2015	8	24	1.108333333	686.3536516	Aug_Sept
440	P	Belwin	2016	6	1	1.9	1338.467875	May_June
441	P	Belwin	2015	7	31	2.216666667	1599.313564	July
442	N	Belwin	2015	7	15	1.683333333	1159.994508	July
443	P	Belwin	2015	8	7	3.233333333	2436.765513	Aug_Sept
444	P	Belwin	2015	7	9	1.833333333	1283.552993	July
445	P	Belwin	2016	6	8	2.458333333	1798.380011	May_June
446	P	Belwin	2016	6	1	0.666666667	322.5425593	May_June
447	P	Belwin	2015	9	1	0.783333333	418.6436021	Aug_Sept
448	N	Belwin	2015	8	14	1.741666667	1208.04503	Aug_Sept
449	P	Belwin	2015	7	9	1.191666667	754.9972545	July
450	N	Belwin	2015	7	20	1.4	926.6062603	July
451	P	Belwin	2015	7	20	1.7	1173.723229	July
452	P	Belwin	2016	5	24	2.141666667	1537.534322	May_June
453	P	Belwin	2016	6	15	1.541666667	1043.300385	May_June
454	P	Belwin	2016	6	24	1.45	967.7924217	May_June
455	P	Belwin	2015	7	15	1.616666667	1105.079627	July
456	P	Belwin	2015	8	20	1.808333333	1262.959912	Aug_Sept
457	N	Belwin	2015	8	14	0.483333333	171.5266334	Aug_Sept
458	P	Belwin	2016	6	15	0.366666667	75.42559061	May_June
459	P	Belwin	2016	6	8	2.591666667	1908.209775	May_June
460	P	Belwin	2016	6	24	2.125	1523.805601	May_June
461	P	Belwin	2016	5	24	0.45	144.0691928	May_June
462	P	Belwin	2016	6	8	0.333333333	47.96814909	May_June
463	N	Belwin	2016	5	17	1.158333333	727.539813	May_June
464	P	Belwin	2016	6	15	1.525	1029.571664	May_June
465	N	Belwin	2015	6	29	1.883333333	1324.739154	May_June
466	P	Belwin	2015	7	31	0.983333333	583.3882479	July
467	P	Belwin	2015	8	6	0.6	267.6276771	Aug_Sept
468	N	Belwin	2015	6	29	2.025	1441.433278	May_June
469	N	Belwin	2015	6	29	1.708333333	1180.587589	May_June
470	N	Belwin	2015	8	14	0.783333333	418.6436021	Aug_Sept
471	P	Belwin	2015	7	15	1.141666667	713.8110931	July
472	P	Belwin	2016	6	15	0.733333333	377.4574407	May_June
473	P	Belwin	2015	7	15	0.525	205.8484349	July
474	N	Belwin	2016	5	17	1.183333333	748.1328937	May_June
475	N	Belwin	2015	6	29	1.566666667	1063.893465	May_June
476	P	Belwin	2016	6	1	1.175	741.2685338	May_June
477	P	Belwin	2015	9	1	0.966666667	569.659528	Aug_Sept
478	P	Belwin	2015	9	1	1.45	967.7924217	Aug_Sept
479	P	Belwin	2015	9	1	1.9	1338.467875	Aug_Sept
480	P	Belwin	2016	5	17	0.975	576.523888	May_June
481	P	Belwin	2015	9	1	0.766666667	404.9148822	Aug_Sept
482	P	Belwin	2015	8	26	1.466666667	981.5211425	Aug_Sept
483	P	Belwin	2015	8	26	2.125	1523.805601	Aug_Sept
484	P	Belwin	2015	8	7	0.666666667	322.5425593	Aug_Sept
485	P	Belwin	2015	7	31	1.208333333	768.7259745	July
486	P	Belwin	2015	7	31	0.883333333	501.015925	July
487	P	Belwin	2015	7	31	1.733333333	1201.18067	July
488	P	Belwin	2015	8	20	1.558333333	1057.029105	Aug_Sept
489	P	Belwin	2015	8	6	1.483333333	995.2498624	Aug_Sept
490	P	Belwin	2016	6	8	2.366666667	1722.872049	May_June
491	P	Belwin	2016	6	24	1.583333333	1077.622185	May_June
492	P	Belwin	2016	6	24	2.166666667	1558.127403	May_June
493	P	Belwin	2015	8	26	1.241666667	796.183416	Aug_Sept
494	N	Belwin	2015	8	20	1.091666667	672.6249316	Aug_Sept
495	P	Belwin	2015	8	7	1.958333333	1386.518396	Aug_Sept
496	P	Belwin	2015	9	1	0.566666667	240.1702364	Aug_Sept
497	N	Belwin	2015	7	9	0.775	411.7792422	July
498	P	Belwin	2015	7	31	0.908333333	521.6090058	July
499	P	Belwin	2015	7	20	2.141666667	1537.534322	July
500	N	Belwin	2015	7	20	1.591666667	1084.486546	July
501	N	Belwin	2015	7	31	0.941666667	549.0664473	July
502	P	Belwin	2015	8	24	0.766666667	404.9148822	Aug_Sept
503	P	Belwin	2015	8	24	0.991666667	590.2526087	Aug_Sept
504	P	Belwin	2015	8	26	0.65	308.8138386	Aug_Sept
505	P	Belwin	2015	9	1	1.591666667	1084.486546	Aug_Sept
506	P	Belwin	2015	8	26	0.733333333	377.4574407	Aug_Sept
507	P	Belwin	2016	5	17	1.441666667	960.9280618	May_June
508	P	Belwin	2015	8	24	0.983333333	583.3882479	Aug_Sept
509	P	Belwin	2016	5	17	0.375	82.28995058	May_June
510	P	Belwin	2015	7	15	1.658333333	1139.401428	July
511	P	Belwin	2016	6	15	1.833333333	1283.552993	May_June
512	P	Belwin	2015	8	14	1.1	679.4892916	Aug_Sept
513	P	Belwin	2015	8	14	1.758333333	1221.77375	Aug_Sept
514	P	Belwin	2015	7	15	1.675	1153.130148	July
515	P	Belwin	2016	6	15	2.1	1503.212521	May_June
516	P	Belwin	2015	8	14	1.716666667	1187.45195	Aug_Sept
517	P	Belwin	2015	7	31	1.208333333	768.7259745	July
518	P	Belwin	2015	7	31	0.875	494.1515651	July
519	P	Belwin	2016	6	15	1.433333333	954.063701	May_June
520	P	Belwin	2015	7	20	0.983333333	583.3882479	July
521	P	Belwin	2016	6	1	1.708333333	1180.587589	May_June
522	P	Belwin	2015	8	14	0.775	411.7792422	Aug_Sept
523	P	Belwin	2016	6	24	2.025	1441.433278	May_June
524	P	Belwin	2015	8	20	0.991666667	590.2526087	Aug_Sept
525	P	Belwin	2015	7	15	1.358333333	892.2844588	July
526	P	Belwin	2016	6	24	1.683333333	1159.994508	May_June
527	P	Belwin	2015	8	7	0.691666667	343.13564	Aug_Sept
528	P	Belwin	2015	7	20	1.258333333	809.9121359	July
529	P	Belwin	2015	7	31	0.683333333	336.2712792	July
530	P	Belwin	2015	8	7	0.308333333	27.37506837	Aug_Sept
531	P	Belwin	2015	7	31	0.741666667	384.3218015	July
532	P	Belwin	2015	7	31	1.25	803.0477759	July
533	N	Belwin	2015	7	9	0.925	535.3377265	July
534	P	Belwin	2016	6	15	1.133333333	706.9467323	May_June
535	P	Belwin	2016	5	17	0.475	164.6622735	May_June
536	P	Belwin	2016	5	17	0.791666667	425.5079629	May_June
537	P	Belwin	2016	6	1	1.566666667	1063.893465	May_June
538	P	Belwin	2015	7	31	1.316666667	857.9626582	July
539	P	Belwin	2015	8	7	0.616666667	281.3563979	Aug_Sept
540	P	Belwin	2015	7	15	0.7	350	July
541	P	Belwin	2015	7	31	2.275	1647.364086	July
542	P	Belwin	2015	7	20	1.233333333	789.3190552	July
543	P	Belwin	2015	7	15	1.233333333	789.3190552	July
544	P	Belwin	2015	7	20	1.333333333	871.6913781	July
545	P	Belwin	2015	6	29	1.758333333	1221.77375	May_June
546	P	Belwin	2015	8	7	1.191666667	754.9972545	Aug_Sept
547	P	Belwin	2015	7	15	1.475	988.3855025	July
548	P	Belwin	2015	6	29	1.208333333	768.7259745	May_June
549	P	Belwin	2015	7	15	2.225	1606.177924	July
550	P	Belwin	2016	6	15	0.925	535.3377265	May_June
551	P	Belwin	2015	7	9	1.75	1214.90939	July
552	P	Belwin	2015	7	9	1.725	1194.31631	July
553	P	Belwin	2016	6	1	0.516666667	198.984075	May_June
554	N	Belwin	2015	9	1	2.416666667	1764.05821	Aug_Sept
555	P	Belwin	2015	8	7	1.6	1091.350906	Aug_Sept
556	P	Belwin	2016	6	1	0.725	370.5930807	May_June
557	P	Belwin	2016	5	17	0.558333333	233.3058756	May_June
558	P	Belwin	2015	9	1	1.758333333	1221.77375	Aug_Sept
559	P	Belwin	2016	5	17	2.083333333	1489.4838	May_June
560	P	Belwin	2015	9	1	0.491666667	178.3909942	Aug_Sept
561	N	Belwin	2016	6	1	4.016666667	3082.015376	May_June
562	P	Belwin	2015	9	1	2.541666667	1867.023614	Aug_Sept
563	P	Belwin	2015	8	7	1.111111111	688.6417718	Aug_Sept
564	P	Belwin	2015	8	14	1.633333333	1118.808347	Aug_Sept
565	P	Belwin	2015	6	29	1.85	1297.281713	May_June
566	P	Belwin	2016	6	8	0.391666667	96.01867133	May_June
567	P	Belwin	2016	6	15	1.366666667	899.1488196	May_June
568	P	Belwin	2015	8	7	0.65	308.8138386	Aug_Sept
569	P	Belwin	2015	7	15	2.891666667	2155.326744	July
570	P	Belwin	2015	8	7	0.641666667	301.9494786	Aug_Sept
571	N	Belwin	2015	6	29	2.533333333	1860.159253	May_June
572	P	Belwin	2015	6	29	1.975	1400.247117	May_June
573	N	Belwin	2015	7	15	1.891666667	1331.603515	July
574	P	Belwin	2016	6	24	1.491666667	1002.114223	May_June
575	P	Belwin	2015	7	15	1.741666667	1208.04503	July
576	P	Belwin	2015	7	15	0.925	535.3377265	July
577	P	Belwin	2015	7	20	1.75	1214.90939	July
578	P	Belwin	2015	7	9	1.883333333	1324.739154	July
579	P	Belwin	2015	8	14	0.458333333	150.9335527	Aug_Sept
580	P	Belwin	2015	6	29	1.45	967.7924217	May_June
581	N	Belwin	2015	8	14	0.45	144.0691928	Aug_Sept
582	P	Belwin	2015	8	20	0.9	514.7446458	Aug_Sept
583	P	Belwin	2016	6	1	1.008333333	603.9813287	May_June
584	P	Belwin	2015	9	1	2.35	1709.143328	Aug_Sept
585	P	Belwin	2015	9	1	0.85	473.5584843	Aug_Sept
586	P	Belwin	2015	9	1	0.708333333	356.86436	Aug_Sept
587	P	Belwin	2015	7	9	1.133333333	706.9467323	July
588	P	Belwin	2015	7	20	1.2	761.8616145	July
589	P	Belwin	2016	6	15	2.041666667	1455.161999	May_June
590	P	Belwin	2015	7	20	0.983333333	583.3882479	July
591	P	Belwin	2015	7	15	1.691666667	1166.858869	July
592	P	Belwin	2015	7	9	1.658333333	1139.401428	July
593	P	Belwin	2015	8	7	1.041666667	631.4387702	Aug_Sept
594	P	Belwin	2015	7	20	1.575	1070.757825	July
595	P	Belwin	2015	8	7	1.216666667	775.5903353	Aug_Sept
596	P	Belwin	2016	6	24	1.891666667	1331.603515	May_June
597	P	Belwin	2016	6	24	0.975	576.523888	May_June
598	P	Belwin	2015	8	7	0.658333333	315.6781985	Aug_Sept
599	P	Belwin	2015	7	31	1.116666667	693.2180124	July
600	P	Belwin	2015	8	20	1.566666667	1063.893465	Aug_Sept
601	P	Belwin	2016	6	8	2.391666667	1743.465129	May_June
602	P	Belwin	2016	6	8	0.308333333	27.37506837	May_June
603	P	Belwin	2015	9	1	1.383333333	912.8775395	Aug_Sept
604	P	Belwin	2015	8	26	1.325	864.8270181	Aug_Sept
605	P	Belwin	2016	5	24	2.291666667	1661.092806	May_June
606	P	Belwin	2016	6	8	2.766666667	2052.36134	May_June
607	P	Belwin	2015	8	20	1.1	679.4892916	Aug_Sept
608	P	Belwin	2015	7	9	2.291666667	1661.092806	July
609	P	Belwin	2016	6	15	1.683333333	1159.994508	May_June
610	P	Belwin	2015	7	15	1.625	1111.943987	July
611	P	Belwin	2015	8	14	1.875	1317.874794	Aug_Sept
612	P	Belwin	2015	6	29	2.558333333	1880.752334	May_June
613	P	Belwin	2015	6	29	1.658333333	1139.401428	May_June
614	P	Belwin	2015	7	31	1.6	1091.350906	July
615	P	Belwin	2016	6	15	1.383333333	912.8775395	May_June
616	P	Belwin	2015	7	9	1.408333333	933.4706203	July
617	P	Belwin	2015	7	9	0.733333333	377.4574407	July
618	P	Belwin	2016	6	15	0.85	473.5584843	May_June
619	P	Belwin	2016	6	8	1.883333333	1324.739154	May_June
620	P	Belwin	2015	8	14	1.016666667	610.8456895	Aug_Sept
621	P	Belwin	2016	6	8	3.158333333	2374.986271	May_June
622	P	Belwin	2015	7	9	1.233333333	789.3190552	July
623	P	Belwin	2016	6	8	2.975	2223.970346	May_June
624	N	Belwin	2015	8	26	0.675	329.4069193	Aug_Sept
625	N	Carleton	2017	5	28	0.197916667	-63.57770428	May_June
626	N	Carleton	2017	5	28	0.375	82.28995058	May_June
627	N	Carleton	2017	5	28	0.75	391.1861614	May_June
628	N	Carleton	2017	5	28	1.020833333	614.277869	May_June
629	N	Carleton	2017	5	28	0.9375	545.6342669	May_June
630	N	Carleton	2017	5	28	0.895833333	511.3124654	May_June
631	N	Carleton	2017	5	28	1.0625	648.5996705	May_June
632	N	Carleton	2017	5	28	1.125	700.0823723	May_June
633	N	Carleton	2017	5	28	1.46875	983.2372323	May_June
634	N	Carleton	2017	6	4	0.635416667	296.8012084	May_June
635	N	Carleton	2017	6	4	1.197916667	760.1455247	May_June
636	N	Carleton	2017	6	4	0.770833333	408.3470618	May_June
637	N	Carleton	2017	6	4	0.78125	416.9275124	May_June
638	N	Carleton	2017	6	4	1.197916667	760.1455247	May_June
639	N	Carleton	2017	6	4	1.5	1008.978583	May_June
640	N	Carleton	2017	6	7	0.71875	365.4448105	May_June
641	N	Carleton	2017	6	7	0.479166667	168.0944539	May_June
642	N	Carleton	2017	6	7	0.510416667	193.8358048	May_June
643	N	Carleton	2017	6	7	0.614583333	279.6403072	May_June
644	N	Carleton	2017	6	7	1.208333333	768.7259745	May_June
645	N	Carleton	2017	6	7	1.354166667	888.8522792	May_June
646	N	Carleton	2017	6	7	0.989583333	588.5365181	May_June
647	N	Carleton	2017	6	7	0.6875	339.7034596	May_June
648	N	Carleton	2017	6	7	1.40625	931.7545305	May_June
649	N	Carleton	2017	6	7	1.791666667	1249.231192	May_June
650	N	Carleton	2017	6	7	0.864583333	485.5711145	May_June
651	N	Carleton	2017	6	7	0.697916667	348.2839102	May_June
652	N	Carleton	2017	6	7	0.833333333	459.8297636	May_June
653	N	Carleton	2017	6	7	0.729166667	374.0252611	May_June
654	N	Carleton	2017	6	7	1.177083333	742.9846236	May_June
655	N	Carleton	2017	6	7	1.302083333	845.9500272	May_June
656	N	Carleton	2017	6	7	0.5625	236.738056	May_June
657	N	Carleton	2017	6	7	0.75	391.1861614	May_June
658	N	Carleton	2017	6	7	0.854166667	476.9906647	May_June
659	N	Carleton	2017	6	7	1.333333333	871.6913781	May_June
660	N	Carleton	2017	6	8	1.1875	751.5650741	May_June
661	N	Carleton	2017	6	8	0.802083333	434.0884127	May_June
662	N	Carleton	2017	6	8	0.947916667	554.2147175	May_June
663	N	Carleton	2017	6	8	0.84375	468.4102142	May_June
664	N	Carleton	2017	6	8	0.96875	571.3756178	May_June
665	N	Carleton	2017	6	8	1.427083333	948.9154308	May_June
666	N	Carleton	2017	6	8	1.177083333	742.9846236	May_June
667	N	Carleton	2017	6	8	2.125	1523.805601	May_June
668	N	Carleton	2017	6	8	3.8125	2913.83855	May_June
669	N	Carleton	2017	6	8	3.864583333	2956.740801	May_June
670	N	Carleton	2017	6	8	0.489583333	176.6749036	May_June
671	N	Carleton	2017	6	8	1.177083333	742.9846236	May_June
672	N	Carleton	2017	6	8	0.854166667	476.9906647	May_June
673	N	Carleton	2017	6	8	1.03125	622.8583196	May_June
674	N	Carleton	2017	6	8	1.010416667	605.6974193	May_June
675	N	Carleton	2017	6	8	1.447916667	966.076332	May_June
676	N	Carleton	2017	6	8	1.322916667	863.1109283	May_June
677	N	Carleton	2017	6	8	1.583333333	1077.622185	May_June
678	N	Carleton	2017	7	17	0.510416667	193.8358048	July
679	N	Carleton	2017	7	17	0.4375	133.7726524	July
680	N	Carleton	2017	7	17	0.6875	339.7034596	July
681	N	Carleton	2017	7	10	1.135416667	708.6628229	July
682	N	Carleton	2017	7	10	1.0625	648.5996705	July
683	N	Carleton	2017	7	10	4.90625	3814.785832	July
684	N	Carleton	2017	7	17	0.28125	5.065897858	July
685	N	Carleton	2017	7	17	0.489583333	176.6749036	July
686	N	Carleton	2017	7	17	0.3125	30.80724876	July
687	N	Carleton	2017	7	17	0.489583333	176.6749036	July
688	N	Carleton	2017	7	17	0.604166667	271.0598575	July
689	N	Carleton	2017	7	17	0.489583333	176.6749036	July
690	N	Carleton	2017	7	10	0.65625	313.9621087	July
691	N	Carleton	2017	7	17	0.71875	365.4448105	July
692	N	Carleton	2017	7	17	1.239583333	794.4673254	July
693	N	Carleton	2017	7	17	1.166666667	734.4041738	July
694	N	Carleton	2017	7	17	1.458333333	974.6567817	July
695	N	Carleton	2017	7	10	4.458333333	3445.826469	July
696	N	Carleton	2017	6	13	0.270833333	-3.514552718	May_June
697	N	Carleton	2017	6	13	0.322916667	39.38769934	May_June
698	N	Carleton	2017	7	10	0.666666667	322.5425593	July
699	N	Carleton	2017	7	10	0.59375	262.4794069	July
700	N	Carleton	2017	6	13	0.770833333	408.3470618	May_June
701	N	Carleton	2017	7	10	1.114583333	691.5019217	July
702	N	Carleton	2017	6	13	0.958333333	562.7951672	May_June
703	N	Carleton	2017	7	10	0.84375	468.4102142	July
704	N	Carleton	2017	7	10	0.916666667	528.4733666	July
705	N	Carleton	2017	6	13	0.8125	442.6688633	May_June
706	N	Carleton	2017	7	10	1.34375	880.2718287	July
707	N	Carleton	2017	7	10	1.229166667	785.8868756	July
708	N	Carleton	2017	6	13	1.166666667	734.4041738	May_June
709	N	Carleton	2017	6	13	1.166666667	734.4041738	May_June
710	N	Carleton	2017	7	10	1.895833333	1335.035694	July
711	N	Carleton	2017	6	13	3.291666667	2484.816035	May_June
712	N	Carleton	2017	6	13	0.552083333	228.1576054	May_June
713	N	Carleton	2017	6	13	1	597.1169687	May_June
714	N	Carleton	2017	6	13	1.239583333	794.4673254	May_June
715	N	Carleton	2017	6	13	1.114583333	691.5019217	May_June
716	N	Carleton	2017	6	13	1.177083333	742.9846236	May_June
717	N	Carleton	2017	6	13	1.197916667	760.1455247	May_June
718	N	Carleton	2017	6	13	1.354166667	888.8522792	May_June
719	N	Carleton	2017	6	13	1.177083333	742.9846236	May_June
720	N	Carleton	2017	6	13	1.291666667	837.3695774	May_June
721	N	Carleton	2017	7	31	0.979166667	579.9560684	July
722	N	Carleton	2017	7	31	1.0625	648.5996705	July
723	N	Carleton	2017	7	31	1.53125	1034.719934	July
724	N	Carleton	2017	7	31	1.572916667	1069.041736	July
725	N	Carleton	2017	7	31	1.458333333	974.6567817	July
726	N	Carleton	2017	7	31	1.677083333	1154.846238	July
727	N	Carleton	2017	7	31	2.21875	1601.029654	July
728	N	Carleton	2017	7	31	2.395833333	1746.897309	July
729	N	Carleton	2017	7	31	1.552083333	1051.880834	July
730	N	Carleton	2017	7	31	0.447916667	142.353103	July
731	N	Carleton	2017	7	31	0.40625	108.0313015	July
732	N	Carleton	2017	7	31	1.28125	828.7891269	July
733	N	Carleton	2017	7	31	1.28125	828.7891269	July
734	N	Carleton	2017	7	31	1.572916667	1069.041736	July
735	N	Carleton	2017	7	31	1.291666667	837.3695774	July
736	N	Carleton	2017	7	31	1.833333333	1283.552993	July
737	N	Carleton	2017	7	31	1.260416667	811.6282265	July
738	N	Carleton	2017	7	31	1.895833333	1335.035694	July
739	N	Carleton	2017	7	31	1.604166667	1094.783086	July
740	N	Carleton	2017	7	31	1.90625	1343.616145	July
741	N	Carleton	2017	7	31	1.427083333	948.9154308	July
742	N	Carleton	2017	7	31	1.760416667	1223.489841	July
743	N	Carleton	2017	7	31	2.03125	1446.581549	July
744	N	Carleton	2017	7	31	2.125	1523.805601	July
745	N	Carleton	2017	6	16	1.208333333	768.7259745	May_June
746	N	Carleton	2017	6	16	1.083333333	665.7605708	May_June
747	N	Carleton	2017	6	16	2.15625	1549.546952	May_June
748	N	Carleton	2017	6	16	2.34375	1703.995058	May_June
749	N	Carleton	2017	6	16	4.145833333	3188.41296	May_June
750	N	Carleton	2017	6	16	4.416666667	3411.504668	May_June
751	N	Carleton	2017	6	20	0.822916667	451.2493138	May_June
752	N	Carleton	2017	6	20	1.302083333	845.9500272	May_June
753	N	Carleton	2017	6	20	1.197916667	760.1455247	May_June
754	N	Carleton	2017	6	20	0.885416667	502.7320157	May_June
755	N	Carleton	2017	6	20	1.447916667	966.076332	May_June
756	N	Carleton	2017	6	20	1.625	1111.943987	May_June
757	N	Carleton	2017	6	20	1.239583333	794.4673254	May_June
758	N	Carleton	2017	6	20	1.427083333	948.9154308	May_June
759	N	Carleton	2017	6	20	1.395833333	923.1740799	May_June
760	N	Carleton	2017	6	23	0.489583333	176.6749036	May_June
761	N	Carleton	2017	6	23	0.916666667	528.4733666	May_June
762	N	Carleton	2017	6	23	0.947916667	554.2147175	May_June
763	N	Carleton	2017	6	23	1.3125	854.5304778	May_June
764	N	Carleton	2017	6	23	1.729166667	1197.74849	May_June
765	N	Carleton	2017	6	23	0.833333333	459.8297636	May_June
766	N	Carleton	2017	6	23	0.90625	519.892916	May_June
767	N	Carleton	2017	6	23	1.364583333	897.432729	May_June
768	N	Carleton	2017	6	23	1.197916667	760.1455247	May_June
769	N	Carleton	2017	6	27	0.354166667	65.12905025	May_June
770	N	Carleton	2017	6	27	0.364583333	73.7095	May_June
771	N	Carleton	2017	6	27	0.552083333	228.1576054	May_June
772	N	Carleton	2017	6	27	0.541666667	219.5771557	May_June
773	N	Carleton	2017	6	27	0.927083333	537.0538163	May_June
774	N	Carleton	2017	6	27	1.1875	751.5650741	May_June
775	N	Carleton	2017	6	27	1.625	1111.943987	May_June
776	N	Carleton	2017	6	27	1.875	1317.874794	May_June
777	N	Carleton	2017	6	27	0.510416667	193.8358048	May_June
778	N	Carleton	2017	6	27	1.083333333	665.7605708	May_June
779	N	Carleton	2017	6	27	1.614583333	1103.363536	May_June
780	N	Carleton	2017	6	27	1.15625	725.8237232	May_June
781	N	Carleton	2017	6	27	1.385416667	914.5936301	May_June
782	N	Carleton	2017	6	27	1.375	906.0131796	May_June
783	N	Carleton	2017	6	27	1.75	1214.90939	May_June
784	N	Carleton	2017	6	27	2.09375	1498.06425	May_June
785	N	Carleton	2017	6	27	2.34375	1703.995058	May_June
786	N	Carleton	2017	6	27	0.59375	262.4794069	May_June
787	N	Carleton	2017	6	27	0.583333333	253.8989563	May_June
788	N	Carleton	2017	6	27	1.0625	648.5996705	May_June
789	N	Carleton	2017	6	27	0.708333333	356.86436	May_June
790	N	Carleton	2017	6	27	1.260416667	811.6282265	May_June
791	N	Carleton	2017	6	27	1.614583333	1103.363536	May_June
792	N	Carleton	2017	7	17	0.520833333	202.4162545	July
793	N	Carleton	2017	7	17	0.375	82.28995058	July
794	N	Carleton	2017	7	17	0.4375	133.7726524	July
795	N	Carleton	2017	7	17	0.479166667	168.0944539	July
796	N	Carleton	2017	7	17	1.604166667	1094.783086	July
797	N	Carleton	2017	7	20	0.90625	519.892916	July
798	N	Carleton	2017	7	20	1.114583333	691.5019217	July
799	N	Carleton	2017	7	24	0.28125	5.065897858	July
800	N	Carleton	2017	7	24	0.979166667	579.9560684	July
801	N	Carleton	2017	7	24	0.84375	468.4102142	July
802	N	Carleton	2017	7	24	1.302083333	845.9500272	July
803	N	Carleton	2017	7	24	1.260416667	811.6282265	July
804	N	Carleton	2017	7	24	1.385416667	914.5936301	July
805	N	Carleton	2017	7	24	0.4375	133.7726524	July
806	N	Carleton	2017	7	24	0.8125	442.6688633	July
807	N	Carleton	2017	7	24	0.96875	571.3756178	July
808	N	Carleton	2017	7	24	1	597.1169687	July
809	N	Carleton	2017	7	24	1.28125	828.7891269	July
810	N	Carleton	2017	7	24	1.708333333	1180.587589	July
811	N	Carleton	2017	7	24	1.4375	957.4958814	July
812	N	Carleton	2017	7	24	1.9375	1369.357496	July
813	N	Carleton	2017	7	24	1.645833333	1129.104887	July
814	N	Carleton	2017	7	24	2.020833333	1438.001098	July
815	N	Carleton	2017	7	24	0.59375	262.4794069	July
816	N	Carleton	2017	7	24	0.53125	210.9967051	July
817	N	Carleton	2017	7	24	0.5	185.2553542	July
818	N	Carleton	2017	7	24	1.270833333	820.2086763	July
819	N	Carleton	2017	7	24	0.864583333	485.5711145	July
820	N	Carleton	2017	8	4	1.1875	751.5650741	Aug_Sept
821	N	Carleton	2017	8	4	0.416666667	116.6117521	Aug_Sept
822	N	Carleton	2017	8	4	0.427083333	125.1922018	Aug_Sept
823	N	Carleton	2017	8	4	0.635416667	296.8012084	Aug_Sept
824	N	Carleton	2017	8	4	0.510416667	193.8358048	Aug_Sept
825	N	Carleton	2017	8	4	0.770833333	408.3470618	Aug_Sept
826	N	Carleton	2017	8	4	0.927083333	537.0538163	Aug_Sept
827	N	Carleton	2017	8	4	1.208333333	768.7259745	Aug_Sept
828	N	Carleton	2017	8	4	1.385416667	914.5936301	Aug_Sept
829	N	Carleton	2017	8	4	1.458333333	974.6567817	Aug_Sept
830	N	Carleton	2017	8	4	1.552083333	1051.880834	Aug_Sept
831	N	Carleton	2017	8	4	0.65625	313.9621087	Aug_Sept
832	N	Carleton	2017	8	4	0.791666667	425.5079629	Aug_Sept
833	N	Carleton	2017	8	4	0.791666667	425.5079629	Aug_Sept
834	N	Carleton	2017	8	4	0.645833333	305.3816582	Aug_Sept
835	N	Carleton	2017	8	4	0.739583333	382.6057109	Aug_Sept
836	N	Carleton	2017	8	4	0.71875	365.4448105	Aug_Sept
837	N	Carleton	2017	8	4	0.8125	442.6688633	Aug_Sept
838	N	Carleton	2017	8	4	0.822916667	451.2493138	Aug_Sept
839	N	Carleton	2017	8	4	1.427083333	948.9154308	Aug_Sept
840	N	Carleton	2017	8	4	1.510416667	1017.559034	Aug_Sept
841	N	Carleton	2017	8	5	0.958333333	562.7951672	Aug_Sept
842	N	Carleton	2017	8	5	1.041666667	631.4387702	Aug_Sept
843	N	Carleton	2017	8	5	1.135416667	708.6628229	Aug_Sept
844	N	Carleton	2017	8	5	1.364583333	897.432729	Aug_Sept
845	N	Carleton	2017	8	5	1.239583333	794.4673254	Aug_Sept
846	N	Carleton	2017	8	5	1.375	906.0131796	Aug_Sept
847	N	Carleton	2017	8	5	1.3125	854.5304778	Aug_Sept
848	N	Carleton	2017	8	5	1.729166667	1197.74849	Aug_Sept
849	N	Carleton	2017	8	5	1.083333333	665.7605708	Aug_Sept
850	N	Carleton	2017	8	5	2.4375	1781.21911	Aug_Sept
851	N	Carleton	2017	8	5	0.822916667	451.2493138	Aug_Sept
852	N	Carleton	2017	8	5	0.760416667	399.766612	Aug_Sept
853	N	Carleton	2017	8	5	0.78125	416.9275124	Aug_Sept
854	N	Carleton	2017	8	5	1.052083333	640.0192199	Aug_Sept
855	N	Carleton	2017	8	5	1.885416667	1326.455245	Aug_Sept
856	N	Carleton	2017	8	5	1.5625	1060.461285	Aug_Sept
857	N	Carleton	2017	8	5	1.739583333	1206.32894	Aug_Sept
858	N	Carleton	2017	8	5	4.020833333	3085.447556	Aug_Sept
859	N	Carleton	2017	8	5	4.052083333	3111.188907	Aug_Sept
860	N	Carleton	2017	8	7	0.635416667	296.8012084	Aug_Sept
861	N	Carleton	2017	8	7	0.6875	339.7034596	Aug_Sept
862	N	Carleton	2017	8	7	1.072916667	657.1801211	Aug_Sept
863	N	Carleton	2017	8	7	1.46875	983.2372323	Aug_Sept
864	N	Carleton	2017	8	7	1.15625	725.8237232	Aug_Sept
865	N	Carleton	2017	8	7	1.25	803.0477759	Aug_Sept
866	N	Carleton	2017	8	7	1.302083333	845.9500272	Aug_Sept
867	N	Carleton	2017	8	7	1.53125	1034.719934	Aug_Sept
868	N	Carleton	2017	8	7	1.010416667	605.6974193	Aug_Sept
869	N	Carleton	2017	8	7	1.479166667	991.8176829	Aug_Sept
870	N	Carleton	2017	8	7	1.729166667	1197.74849	Aug_Sept
871	N	Carleton	2017	8	7	3.1875	2399.011532	Aug_Sept
872	N	Carleton	2017	8	7	3.739583333	2853.775398	Aug_Sept
873	N	Carleton	2017	8	7	4.59375	3557.372323	Aug_Sept
874	N	Carleton	2017	8	11	0.645833333	305.3816582	Aug_Sept
875	N	Carleton	2017	8	11	0.59375	262.4794069	Aug_Sept
876	N	Carleton	2017	8	11	0.5625	236.738056	Aug_Sept
877	N	Carleton	2017	8	11	0.9375	545.6342669	Aug_Sept
878	N	Carleton	2017	8	11	1.541666667	1043.300385	Aug_Sept
879	N	Carleton	2017	8	11	0.979166667	579.9560684	Aug_Sept
880	N	Carleton	2017	8	11	1.197916667	760.1455247	Aug_Sept
881	N	Carleton	2017	8	11	1.479166667	991.8176829	Aug_Sept
882	N	Carleton	2017	8	11	1.614583333	1103.363536	Aug_Sept
883	N	Carleton	2017	8	11	1.03125	622.8583196	Aug_Sept
884	N	Carleton	2017	8	11	1.125	700.0823723	Aug_Sept
885	N	Carleton	2017	8	11	1.479166667	991.8176829	Aug_Sept
886	N	Carleton	2017	8	15	0.885416667	502.7320157	Aug_Sept
887	N	Carleton	2017	8	15	0.75	391.1861614	Aug_Sept
888	N	Carleton	2017	8	15	0.885416667	502.7320157	Aug_Sept
889	N	Carleton	2017	8	15	1.489583333	1000.398133	Aug_Sept
890	N	Carleton	2017	8	15	1.322916667	863.1109283	Aug_Sept
891	N	Carleton	2017	8	15	1.583333333	1077.622185	Aug_Sept
892	N	Carleton	2017	8	15	1.260416667	811.6282265	Aug_Sept
893	N	Carleton	2017	8	15	1.708333333	1180.587589	Aug_Sept
894	N	Carleton	2017	8	15	2.010416667	1429.420648	Aug_Sept
895	N	Carleton	2017	8	15	0.364583333	73.7095	Aug_Sept
896	N	Carleton	2017	8	15	1.177083333	742.9846236	Aug_Sept
897	N	Carleton	2017	8	15	0.96875	571.3756178	Aug_Sept
898	N	Carleton	2017	8	15	0.854166667	476.9906647	Aug_Sept
899	N	Carleton	2017	8	15	1.166666667	734.4041738	Aug_Sept
900	N	Carleton	2017	8	15	1.322916667	863.1109283	Aug_Sept
901	N	Carleton	2017	8	15	1.333333333	871.6913781	Aug_Sept
902	N	Carleton	2017	8	15	1.635416667	1120.524437	Aug_Sept
903	N	Carleton	2017	8	15	1.239583333	794.4673254	Aug_Sept
904	N	Carleton	2017	8	20	0.854166667	476.9906647	Aug_Sept
905	N	Carleton	2017	8	20	1.166666667	734.4041738	Aug_Sept
906	N	Carleton	2017	8	20	2.895833333	2158.758923	Aug_Sept
907	N	Carleton	2017	8	20	6.822916667	5393.588688	Aug_Sept
908	N	Carleton	2017	8	20	0.979166667	579.9560684	Aug_Sept
909	N	Carleton	2017	8	20	0.895833333	511.3124654	Aug_Sept
910	N	Carleton	2017	8	20	1.385416667	914.5936301	Aug_Sept
911	N	Carleton	2017	8	20	1.291666667	837.3695774	Aug_Sept
912	N	Carleton	2017	8	20	1.020833333	614.277869	Aug_Sept
913	N	Carleton	2017	8	20	1.59375	1086.202636	Aug_Sept
914	N	Carleton	2017	8	20	0.5625	236.738056	Aug_Sept
915	N	Carleton	2017	8	20	0.614583333	279.6403072	Aug_Sept
916	N	Carleton	2017	8	20	0.65625	313.9621087	Aug_Sept
917	N	Carleton	2017	8	20	1.375	906.0131796	Aug_Sept
918	N	Carleton	2017	8	20	1.041666667	631.4387702	Aug_Sept
919	N	Carleton	2017	8	20	1.375	906.0131796	Aug_Sept
920	N	Carleton	2017	8	20	1.302083333	845.9500272	Aug_Sept
921	N	Carleton	2017	8	20	1.885416667	1326.455245	Aug_Sept
922	N	Carleton	2017	8	23	0.75	391.1861614	Aug_Sept
923	N	Carleton	2017	8	23	0.541666667	219.5771557	Aug_Sept
924	N	Carleton	2017	8	23	1.041666667	631.4387702	Aug_Sept
925	N	Carleton	2017	8	23	1.145833333	717.2432727	Aug_Sept
926	N	Carleton	2017	8	23	1.15625	725.8237232	Aug_Sept
927	N	Carleton	2017	8	23	1.208333333	768.7259745	Aug_Sept
928	N	Carleton	2017	8	23	0.979166667	579.9560684	Aug_Sept
929	N	Carleton	2017	8	23	1.229166667	785.8868756	Aug_Sept
930	N	Carleton	2017	8	23	1.114583333	691.5019217	Aug_Sept
931	N	Carleton	2017	5	28	0.4375	133.7726524	May_June
932	N	Carleton	2017	6	4	1.177083333	742.9846236	May_June
933	N	Carleton	2017	6	4	1.552083333	1051.880834	May_June
934	N	Carleton	2017	6	7	0.8125	442.6688633	May_June
935	N	Carleton	2017	6	7	1	597.1169687	May_June
936	N	Carleton	2017	6	7	1.3125	854.5304778	May_June
937	N	Carleton	2017	6	7	2.322916667	1686.834157	May_June
938	N	Carleton	2017	6	7	0.96875	571.3756178	May_June
939	N	Carleton	2017	6	7	1.0625	648.5996705	May_June
940	N	Carleton	2017	6	7	1.145833333	717.2432727	May_June
941	N	Carleton	2017	6	7	1.239583333	794.4673254	May_June
942	N	Carleton	2017	6	7	1.885416667	1326.455245	May_June
943	N	Carleton	2017	6	8	0.5	185.2553542	May_June
944	N	Carleton	2017	6	8	0.802083333	434.0884127	May_June
945	N	Carleton	2017	6	8	0.8125	442.6688633	May_June
946	N	Carleton	2017	6	8	0.729166667	374.0252611	May_June
947	N	Carleton	2017	6	8	0.75	391.1861614	May_June
948	N	Carleton	2017	6	8	0.739583333	382.6057109	May_June
949	N	Carleton	2017	6	8	0.90625	519.892916	May_June
950	N	Carleton	2017	6	8	0.802083333	434.0884127	May_June
951	N	Carleton	2017	6	8	0.802083333	434.0884127	May_June
952	N	Carleton	2017	6	8	1.0625	648.5996705	May_June
953	N	Carleton	2017	6	8	1.302083333	845.9500272	May_June
954	N	Carleton	2017	7	17	0.5	185.2553542	July
955	N	Carleton	2017	7	10	0.864583333	485.5711145	July
956	N	Carleton	2017	7	10	1.625	1111.943987	July
957	N	Carleton	2017	7	10	1.354166667	888.8522792	July
958	N	Carleton	2017	7	10	1.666666667	1146.265788	July
959	N	Carleton	2017	7	10	1.791666667	1249.231192	July
960	N	Carleton	2017	7	10	0.916666667	528.4733666	July
961	N	Carleton	2017	7	10	4.864583333	3780.46403	July
962	N	Carleton	2017	7	10	1.864583333	1309.294343	July
963	N	Carleton	2017	6	16	1.302083333	845.9500272	May_June
964	N	Carleton	2017	6	16	1.1875	751.5650741	May_June
965	N	Carleton	2017	6	16	1.166666667	734.4041738	May_June
966	N	Carleton	2017	6	16	1.46875	983.2372323	May_June
967	N	Carleton	2017	6	16	1.375	906.0131796	May_June
968	N	Carleton	2017	6	16	1.6875	1163.426689	May_June
969	N	Carleton	2017	6	16	1.3125	854.5304778	May_June
970	N	Carleton	2017	6	16	1.5625	1060.461285	May_June
971	N	Carleton	2017	6	16	1.833333333	1283.552993	May_June
972	N	Carleton	2017	6	16	2.052083333	1463.742449	May_June
973	N	Carleton	2017	6	16	2.552083333	1875.604063	May_June
974	N	Carleton	2017	6	16	1.09375	674.3410214	May_June
975	N	Carleton	2017	6	16	1.125	700.0823723	May_June
976	N	Carleton	2017	6	16	1.197916667	760.1455247	May_June
977	N	Carleton	2017	6	16	5.520833333	4321.0324	May_June
978	N	Carleton	2017	6	16	4.520833333	3497.309171	May_June
979	N	Carleton	2017	6	20	0.5625	236.738056	May_June
980	N	Carleton	2017	6	20	1.989583333	1412.259747	May_June
981	N	Carleton	2017	6	20	1.833333333	1283.552993	May_June
982	N	Carleton	2017	6	20	1.583333333	1077.622185	May_June
983	N	Carleton	2017	6	23	0.791666667	425.5079629	May_June
984	N	Carleton	2017	6	23	0.875	494.1515651	May_June
985	N	Carleton	2017	6	23	0.739583333	382.6057109	May_June
986	N	Carleton	2017	6	23	1.40625	931.7545305	May_June
987	N	Carleton	2017	6	23	1.854166667	1300.713894	May_June
988	N	Carleton	2017	6	23	1.75	1214.90939	May_June
989	N	Carleton	2017	6	23	1.46875	983.2372323	May_June
990	N	Carleton	2017	6	23	3.708333333	2828.034047	May_June
991	N	Carleton	2017	6	27	1.5	1008.978583	May_June
992	N	Carleton	2017	6	27	1.208333333	768.7259745	May_June
993	N	Carleton	2017	6	27	0.6875	339.7034596	May_June
994	N	Carleton	2017	6	27	0.78125	416.9275124	May_June
995	N	Carleton	2017	6	27	1.833333333	1283.552993	May_June
996	N	Carleton	2017	7	20	0.3125	30.80724876	July
997	N	Carleton	2017	7	20	0.21875	-46.41680395	July
998	N	Carleton	2017	7	20	0.364583333	73.7095	July
999	N	Carleton	2017	7	20	0.90625	519.892916	July
1000	N	Carleton	2017	7	20	1.09375	674.3410214	July
1001	N	Carleton	2017	7	20	0.90625	519.892916	July
1002	N	Carleton	2017	7	20	0.875	494.1515651	July
1003	N	Carleton	2017	7	20	1.3125	854.5304778	July
1004	N	Carleton	2017	7	20	1.270833333	820.2086763	July
1005	N	Carleton	2017	7	20	0.302083333	22.22679819	July
1006	N	Carleton	2017	7	24	0.333333333	47.96814909	July
1007	N	Carleton	2017	8	11	0.6875	339.7034596	Aug_Sept
1008	N	Carleton	2017	8	15	1	597.1169687	Aug_Sept
1009	P	Carleton	2017	5	28	0.96875	571.3756178	May_June
1010	P	Carleton	2017	5	28	1.072916667	657.1801211	May_June
1011	P	Carleton	2017	5	28	1.302083333	845.9500272	May_June
1012	P	Carleton	2017	5	28	1.604166667	1094.783086	May_June
1013	P	Carleton	2017	5	28	1.489583333	1000.398133	May_June
1014	P	Carleton	2017	5	28	1.854166667	1300.713894	May_June
1015	P	Carleton	2017	5	28	1.739583333	1206.32894	May_June
1016	P	Carleton	2017	5	28	1.989583333	1412.259747	May_June
1017	P	Carleton	2017	5	28	1.5625	1060.461285	May_June
1018	P	Carleton	2017	5	28	1.78125	1240.650741	May_June
1019	P	Carleton	2017	6	4	0.635416667	296.8012084	May_June
1020	P	Carleton	2017	6	4	0.635416667	296.8012084	May_June
1021	P	Carleton	2017	6	4	0.635416667	296.8012084	May_June
1022	P	Carleton	2017	6	4	0.75	391.1861614	May_June
1023	P	Carleton	2017	6	4	1.21875	777.306425	May_June
1024	P	Carleton	2017	6	4	1.302083333	845.9500272	May_June
1025	P	Carleton	2017	6	4	1.447916667	966.076332	May_June
1026	P	Carleton	2017	6	4	1.458333333	974.6567817	May_June
1027	P	Carleton	2017	6	4	1.53125	1034.719934	May_June
1028	P	Carleton	2017	6	4	1.729166667	1197.74849	May_June
1029	P	Carleton	2017	6	7	0.802083333	434.0884127	May_June
1030	P	Carleton	2017	6	7	0.645833333	305.3816582	May_June
1031	P	Carleton	2017	6	7	0.604166667	271.0598575	May_June
1032	P	Carleton	2017	6	7	0.59375	262.4794069	May_June
1033	P	Carleton	2017	6	7	0.729166667	374.0252611	May_June
1034	P	Carleton	2017	6	7	1.166666667	734.4041738	May_June
1035	P	Carleton	2017	6	7	1.21875	777.306425	May_June
1036	P	Carleton	2017	6	7	1.34375	880.2718287	May_June
1037	P	Carleton	2017	6	7	1.520833333	1026.139484	May_June
1038	P	Carleton	2017	6	7	1.885416667	1326.455245	May_June
1039	P	Carleton	2017	6	7	0.677083333	331.1230091	May_June
1040	P	Carleton	2017	6	7	1.708333333	1180.587589	May_June
1041	P	Carleton	2017	6	7	0.635416667	296.8012084	May_June
1042	P	Carleton	2017	6	7	1.28125	828.7891269	May_June
1043	P	Carleton	2017	6	7	1.697916667	1172.007139	May_June
1044	P	Carleton	2017	6	7	4.010416667	3076.867106	May_June
1045	P	Carleton	2017	6	7	4.25	3274.217463	May_June
1046	P	Carleton	2017	6	7	4.479166667	3462.98737	May_June
1047	P	Carleton	2017	6	7	4.375	3377.182867	May_June
1048	P	Carleton	2017	6	7	4.739583333	3677.498627	May_June
1049	P	Carleton	2017	6	7	0.6875	339.7034596	May_June
1050	P	Carleton	2017	6	7	0.895833333	511.3124654	May_June
1051	P	Carleton	2017	6	7	0.5	185.2553542	May_June
1052	P	Carleton	2017	6	7	0.65625	313.9621087	May_June
1053	P	Carleton	2017	6	7	0.75	391.1861614	May_June
1054	P	Carleton	2017	6	7	0.697916667	348.2839102	May_June
1055	P	Carleton	2017	6	7	1.166666667	734.4041738	May_June
1056	P	Carleton	2017	6	7	1.3125	854.5304778	May_June
1057	P	Carleton	2017	6	7	1.510416667	1017.559034	May_June
1058	P	Carleton	2017	6	7	1.135416667	708.6628229	May_June
1059	P	Carleton	2017	6	8	0.729166667	374.0252611	May_June
1060	P	Carleton	2017	6	8	0.75	391.1861614	May_June
1061	P	Carleton	2017	6	8	0.854166667	476.9906647	May_June
1062	P	Carleton	2017	6	8	0.885416667	502.7320157	May_June
1063	P	Carleton	2017	6	8	0.947916667	554.2147175	May_June
1064	P	Carleton	2017	6	8	1.197916667	760.1455247	May_June
1065	P	Carleton	2017	6	8	1.083333333	665.7605708	May_June
1066	P	Carleton	2017	6	8	1.09375	674.3410214	May_June
1067	P	Carleton	2017	6	8	0.489583333	176.6749036	May_June
1068	P	Carleton	2017	6	8	0.875	494.1515651	May_June
1069	P	Carleton	2017	6	8	1.0625	648.5996705	May_June
1070	P	Carleton	2017	6	8	0.864583333	485.5711145	May_June
1071	P	Carleton	2017	6	8	1.135416667	708.6628229	May_June
1072	P	Carleton	2017	6	8	1.020833333	614.277869	May_June
1073	P	Carleton	2017	6	8	1.083333333	665.7605708	May_June
1074	P	Carleton	2017	6	8	1.104166667	682.921472	May_June
1075	P	Carleton	2017	6	8	1.104166667	682.921472	May_June
1076	P	Carleton	2017	6	8	1.104166667	682.921472	May_June
1077	P	Carleton	2017	6	8	1.0625	648.5996705	May_June
1078	P	Carleton	2017	6	8	1.625	1111.943987	May_June
1079	P	Carleton	2017	6	8	1.395833333	923.1740799	May_June
1080	P	Carleton	2017	7	10	0.625	288.2207578	July
1081	P	Carleton	2017	7	10	0.34375	56.54859967	July
1082	P	Carleton	2017	7	10	0.46875	159.5140033	July
1083	P	Carleton	2017	7	17	1.072916667	657.1801211	July
1084	P	Carleton	2017	7	17	1.291666667	837.3695774	July
1085	P	Carleton	2017	7	17	0.75	391.1861614	July
1086	P	Carleton	2017	7	10	1.333333333	871.6913781	July
1087	P	Carleton	2017	7	10	1.15625	725.8237232	July
1088	P	Carleton	2017	7	17	1.15625	725.8237232	July
1089	P	Carleton	2017	7	10	1.072916667	657.1801211	July
1090	P	Carleton	2017	7	10	1.166666667	734.4041738	July
1091	P	Carleton	2017	7	17	1.322916667	863.1109283	July
1092	P	Carleton	2017	7	17	0.385416667	90.87040115	July
1093	P	Carleton	2017	7	10	0.71875	365.4448105	July
1094	P	Carleton	2017	7	17	1.177083333	742.9846236	July
1095	P	Carleton	2017	7	10	0.854166667	476.9906647	July
1096	P	Carleton	2017	7	17	1.21875	777.306425	July
1097	P	Carleton	2017	7	17	0.635416667	296.8012084	July
1098	P	Carleton	2017	7	17	1.125	700.0823723	July
1099	P	Carleton	2017	7	17	1.177083333	742.9846236	July
1100	P	Carleton	2017	7	17	1.052083333	640.0192199	July
1101	P	Carleton	2017	7	17	1.0625	648.5996705	July
1102	P	Carleton	2017	7	10	0.822916667	451.2493138	July
1103	P	Carleton	2017	7	17	1.59375	1086.202636	July
1104	P	Carleton	2017	6	13	0.3125	30.80724876	May_June
1105	P	Carleton	2017	7	10	1	597.1169687	July
1106	P	Carleton	2017	7	10	1.041666667	631.4387702	July
1107	P	Carleton	2017	7	10	1.197916667	760.1455247	July
1108	P	Carleton	2017	6	13	0.96875	571.3756178	May_June
1109	P	Carleton	2017	7	10	0.9375	545.6342669	July
1110	P	Carleton	2017	7	10	1.072916667	657.1801211	July
1111	P	Carleton	2017	7	10	1.114583333	691.5019217	July
1112	P	Carleton	2017	7	10	1.010416667	605.6974193	July
1113	P	Carleton	2017	7	10	1.208333333	768.7259745	July
1114	P	Carleton	2017	7	10	1.083333333	665.7605708	July
1115	P	Carleton	2017	6	13	1.541666667	1043.300385	May_June
1116	P	Carleton	2017	7	10	1.333333333	871.6913781	July
1117	P	Carleton	2017	6	13	3.322916667	2510.557386	May_June
1118	P	Carleton	2017	6	13	0.59375	262.4794069	May_June
1119	P	Carleton	2017	6	13	0.489583333	176.6749036	May_June
1120	P	Carleton	2017	6	13	0.78125	416.9275124	May_June
1121	P	Carleton	2017	6	13	0.84375	468.4102142	May_June
1122	P	Carleton	2017	6	13	1.166666667	734.4041738	May_June
1123	P	Carleton	2017	6	13	1.28125	828.7891269	May_June
1124	P	Carleton	2017	6	13	1.291666667	837.3695774	May_June
1125	P	Carleton	2017	6	13	1.333333333	871.6913781	May_June
1126	P	Carleton	2017	6	13	1.3125	854.5304778	May_June
1127	P	Carleton	2017	6	13	1.302083333	845.9500272	May_June
1128	P	Carleton	2017	7	31	1.1875	751.5650741	July
1129	P	Carleton	2017	7	31	1.104166667	682.921472	July
1130	P	Carleton	2017	7	31	1.302083333	845.9500272	July
1131	P	Carleton	2017	7	31	1.34375	880.2718287	July
1132	P	Carleton	2017	7	31	1.604166667	1094.783086	July
1133	P	Carleton	2017	7	31	2.25	1626.771005	July
1134	P	Carleton	2017	7	31	2.114583333	1515.225151	July
1135	P	Carleton	2017	7	31	2.135416667	1532.386052	July
1136	P	Carleton	2017	7	31	3.645833333	2776.551345	July
1137	P	Carleton	2017	7	31	3.625	2759.390445	July
1138	P	Carleton	2017	7	31	0.510416667	193.8358048	July
1139	P	Carleton	2017	7	31	0.489583333	176.6749036	July
1140	P	Carleton	2017	7	31	0.541666667	219.5771557	July
1141	P	Carleton	2017	7	31	1.1875	751.5650741	July
1142	P	Carleton	2017	7	31	1.541666667	1043.300385	July
1143	P	Carleton	2017	7	31	1.645833333	1129.104887	July
1144	P	Carleton	2017	7	31	1.989583333	1412.259747	July
1145	P	Carleton	2017	7	31	1.25	803.0477759	July
1146	P	Carleton	2017	7	31	2.083333333	1489.4838	July
1147	P	Carleton	2017	7	31	1.708333333	1180.587589	July
1148	P	Carleton	2017	7	31	2.020833333	1438.001098	July
1149	P	Carleton	2017	7	31	3.25	2450.494234	July
1150	P	Carleton	2017	7	31	2.333333333	1695.414607	July
1151	P	Carleton	2017	6	16	0.958333333	562.7951672	May_June
1152	P	Carleton	2017	6	16	1.604166667	1094.783086	May_June
1153	P	Carleton	2017	6	16	1.135416667	708.6628229	May_June
1154	P	Carleton	2017	6	16	1.25	803.0477759	May_June
1155	P	Carleton	2017	6	16	1.229166667	785.8868756	May_June
1156	P	Carleton	2017	6	16	1.489583333	1000.398133	May_June
1157	P	Carleton	2017	6	16	1.708333333	1180.587589	May_June
1158	P	Carleton	2017	6	16	1.604166667	1094.783086	May_June
1159	P	Carleton	2017	6	16	1.947916667	1377.937946	May_June
1160	P	Carleton	2017	6	16	1.927083333	1360.777045	May_June
1161	P	Carleton	2017	6	16	1.677083333	1154.846238	May_June
1162	P	Carleton	2017	6	16	2.8125	2090.115321	May_June
1163	P	Carleton	2017	6	20	0.46875	159.5140033	May_June
1164	P	Carleton	2017	6	20	0.770833333	408.3470618	May_June
1165	P	Carleton	2017	6	20	0.666666667	322.5425593	May_June
1166	P	Carleton	2017	6	20	0.59375	262.4794069	May_June
1167	P	Carleton	2017	6	20	0.739583333	382.6057109	May_June
1168	P	Carleton	2017	6	20	1.708333333	1180.587589	May_June
1169	P	Carleton	2017	6	20	1.927083333	1360.777045	May_June
1170	P	Carleton	2017	6	20	1.854166667	1300.713894	May_June
1171	P	Carleton	2017	6	20	2.135416667	1532.386052	May_June
1172	P	Carleton	2017	6	20	2.177083333	1566.707853	May_June
1173	P	Carleton	2017	6	23	0.770833333	408.3470618	May_June
1174	P	Carleton	2017	6	23	0.979166667	579.9560684	May_June
1175	P	Carleton	2017	6	23	0.916666667	528.4733666	May_June
1176	P	Carleton	2017	6	23	0.729166667	374.0252611	May_June
1177	P	Carleton	2017	6	23	1.53125	1034.719934	May_June
1178	P	Carleton	2017	6	23	0.802083333	434.0884127	May_June
1179	P	Carleton	2017	6	23	1.5625	1060.461285	May_June
1180	P	Carleton	2017	6	23	1.90625	1343.616145	May_June
1181	P	Carleton	2017	6	23	2.125	1523.805601	May_June
1182	P	Carleton	2017	6	23	0.333333333	47.96814909	May_June
1183	P	Carleton	2017	6	23	0.583333333	253.8989563	May_June
1184	P	Carleton	2017	6	23	0.90625	519.892916	May_June
1185	P	Carleton	2017	6	23	0.770833333	408.3470618	May_June
1186	P	Carleton	2017	6	23	0.854166667	476.9906647	May_June
1187	P	Carleton	2017	6	23	0.78125	416.9275124	May_June
1188	P	Carleton	2017	6	23	1.010416667	605.6974193	May_June
1189	P	Carleton	2017	6	23	1	597.1169687	May_June
1190	P	Carleton	2017	6	23	1.28125	828.7891269	May_June
1191	P	Carleton	2017	6	23	1.6875	1163.426689	May_June
1192	P	Carleton	2017	6	27	0.447916667	142.353103	May_June
1193	P	Carleton	2017	6	27	0.833333333	459.8297636	May_June
1194	P	Carleton	2017	6	27	1.677083333	1154.846238	May_June
1195	P	Carleton	2017	6	27	1.854166667	1300.713894	May_June
1196	P	Carleton	2017	6	27	1.78125	1240.650741	May_June
1197	P	Carleton	2017	6	27	1.96875	1395.098847	May_June
1198	P	Carleton	2017	6	27	1.864583333	1309.294343	May_June
1199	P	Carleton	2017	6	27	2.0625	1472.3229	May_June
1200	P	Carleton	2017	6	27	3.364583333	2544.879187	May_June
1201	P	Carleton	2017	6	27	0.614583333	279.6403072	May_June
1202	P	Carleton	2017	6	27	0.697916667	348.2839102	May_June
1203	P	Carleton	2017	6	27	0.40625	108.0313015	May_June
1204	P	Carleton	2017	6	27	1.125	700.0823723	May_June
1205	P	Carleton	2017	6	27	1.6875	1163.426689	May_June
1206	P	Carleton	2017	6	27	1.885416667	1326.455245	May_June
1207	P	Carleton	2017	6	27	1.916666667	1352.196596	May_June
1208	P	Carleton	2017	6	27	2.239583333	1618.190554	May_June
1209	P	Carleton	2017	6	27	0.78125	416.9275124	May_June
1210	P	Carleton	2017	7	20	0.302083333	22.22679819	July
1211	P	Carleton	2017	7	20	1.197916667	760.1455247	July
1212	P	Carleton	2017	7	20	1.270833333	820.2086763	July
1213	P	Carleton	2017	7	20	0.364583333	73.7095	July
1214	P	Carleton	2017	7	20	0.75	391.1861614	July
1215	P	Carleton	2017	7	20	0.791666667	425.5079629	July
1216	P	Carleton	2017	7	20	1.15625	725.8237232	July
1217	P	Carleton	2017	7	20	1.458333333	974.6567817	July
1218	P	Carleton	2017	7	24	0.302083333	22.22679819	July
1219	P	Carleton	2017	7	24	0.552083333	228.1576054	July
1220	P	Carleton	2017	7	24	0.552083333	228.1576054	July
1221	P	Carleton	2017	7	24	0.96875	571.3756178	July
1222	P	Carleton	2017	7	24	0.958333333	562.7951672	July
1223	P	Carleton	2017	7	24	1.260416667	811.6282265	July
1224	P	Carleton	2017	7	24	1.333333333	871.6913781	July
1225	P	Carleton	2017	7	24	1.21875	777.306425	July
1226	P	Carleton	2017	7	24	1.552083333	1051.880834	July
1227	P	Carleton	2017	7	24	1.71875	1189.16804	July
1228	P	Carleton	2017	7	24	1.520833333	1026.139484	July
1229	P	Carleton	2017	7	24	1.625	1111.943987	July
1230	P	Carleton	2017	7	24	1.770833333	1232.070291	July
1231	P	Carleton	2017	7	24	1.5	1008.978583	July
1232	P	Carleton	2017	7	24	1.375	906.0131796	July
1233	P	Carleton	2017	7	24	1.8125	1266.392092	July
1234	P	Carleton	2017	7	24	1.8125	1266.392092	July
1235	P	Carleton	2017	7	24	1.84375	1292.133443	July
1236	P	Carleton	2017	7	24	2.041666667	1455.161999	July
1237	P	Carleton	2017	7	24	0.760416667	399.766612	July
1238	P	Carleton	2017	7	24	0.552083333	228.1576054	July
1239	P	Carleton	2017	7	24	0.65625	313.9621087	July
1240	P	Carleton	2017	8	4	0.739583333	382.6057109	Aug_Sept
1241	P	Carleton	2017	8	4	0.53125	210.9967051	Aug_Sept
1242	P	Carleton	2017	8	4	0.510416667	193.8358048	Aug_Sept
1243	P	Carleton	2017	8	4	0.666666667	322.5425593	Aug_Sept
1244	P	Carleton	2017	8	4	0.822916667	451.2493138	Aug_Sept
1245	P	Carleton	2017	8	4	1.520833333	1026.139484	Aug_Sept
1246	P	Carleton	2017	8	4	0.625	288.2207578	Aug_Sept
1247	P	Carleton	2017	8	4	0.708333333	356.86436	Aug_Sept
1248	P	Carleton	2017	8	4	0.645833333	305.3816582	Aug_Sept
1249	P	Carleton	2017	8	4	0.916666667	528.4733666	Aug_Sept
1250	P	Carleton	2017	8	4	1.125	700.0823723	Aug_Sept
1251	P	Carleton	2017	8	4	1.5	1008.978583	Aug_Sept
1252	P	Carleton	2017	8	4	1.416666667	940.3349811	Aug_Sept
1253	P	Carleton	2017	8	4	1.645833333	1129.104887	Aug_Sept
1254	P	Carleton	2017	8	4	1.697916667	1172.007139	Aug_Sept
1255	P	Carleton	2017	8	4	2.635416667	1944.247666	Aug_Sept
1256	P	Carleton	2017	8	4	0.927083333	537.0538163	Aug_Sept
1257	P	Carleton	2017	8	4	1.677083333	1154.846238	Aug_Sept
1258	P	Carleton	2017	8	4	2.125	1523.805601	Aug_Sept
1259	P	Carleton	2017	8	5	1.333333333	871.6913781	Aug_Sept
1260	P	Carleton	2017	8	5	2.041666667	1455.161999	Aug_Sept
1261	P	Carleton	2017	8	5	1.9375	1369.357496	Aug_Sept
1262	P	Carleton	2017	8	5	0.541666667	219.5771557	Aug_Sept
1263	P	Carleton	2017	8	5	0.729166667	374.0252611	Aug_Sept
1264	P	Carleton	2017	8	5	0.614583333	279.6403072	Aug_Sept
1265	P	Carleton	2017	8	5	1.260416667	811.6282265	Aug_Sept
1266	P	Carleton	2017	8	5	0.635416667	296.8012084	Aug_Sept
1267	P	Carleton	2017	8	5	0.614583333	279.6403072	Aug_Sept
1268	P	Carleton	2017	8	5	0.59375	262.4794069	Aug_Sept
1269	P	Carleton	2017	8	5	0.729166667	374.0252611	Aug_Sept
1270	P	Carleton	2017	8	5	1.177083333	742.9846236	Aug_Sept
1271	P	Carleton	2017	8	5	1.489583333	1000.398133	Aug_Sept
1272	P	Carleton	2017	8	5	1.520833333	1026.139484	Aug_Sept
1273	P	Carleton	2017	8	5	2.041666667	1455.161999	Aug_Sept
1274	P	Carleton	2017	8	5	1.4375	957.4958814	Aug_Sept
1275	P	Carleton	2017	8	5	2.1875	1575.288303	Aug_Sept
1276	P	Carleton	2017	8	7	0.770833333	408.3470618	Aug_Sept
1277	P	Carleton	2017	8	7	0.729166667	374.0252611	Aug_Sept
1278	P	Carleton	2017	8	7	0.84375	468.4102142	Aug_Sept
1279	P	Carleton	2017	8	7	1.135416667	708.6628229	Aug_Sept
1280	P	Carleton	2017	8	7	1.010416667	605.6974193	Aug_Sept
1281	P	Carleton	2017	8	7	1.458333333	974.6567817	Aug_Sept
1282	P	Carleton	2017	8	7	0.635416667	296.8012084	Aug_Sept
1283	P	Carleton	2017	8	7	1.020833333	614.277869	Aug_Sept
1284	P	Carleton	2017	8	7	1.114583333	691.5019217	Aug_Sept
1285	P	Carleton	2017	8	7	1.010416667	605.6974193	Aug_Sept
1286	P	Carleton	2017	8	7	0.916666667	528.4733666	Aug_Sept
1287	P	Carleton	2017	8	7	1.71875	1189.16804	Aug_Sept
1288	P	Carleton	2017	8	7	1.291666667	837.3695774	Aug_Sept
1289	P	Carleton	2017	8	7	1.510416667	1017.559034	Aug_Sept
1290	P	Carleton	2017	8	7	1.854166667	1300.713894	Aug_Sept
1291	P	Carleton	2017	8	7	1.895833333	1335.035694	Aug_Sept
1292	P	Carleton	2017	8	11	0.239583333	-29.25590362	Aug_Sept
1293	P	Carleton	2017	8	11	0.510416667	193.8358048	Aug_Sept
1294	P	Carleton	2017	8	11	0.635416667	296.8012084	Aug_Sept
1295	P	Carleton	2017	8	11	0.5	185.2553542	Aug_Sept
1296	P	Carleton	2017	8	11	0.927083333	537.0538163	Aug_Sept
1297	P	Carleton	2017	8	11	0.979166667	579.9560684	Aug_Sept
1298	P	Carleton	2017	8	11	0.75	391.1861614	Aug_Sept
1299	P	Carleton	2017	8	11	1.052083333	640.0192199	Aug_Sept
1300	P	Carleton	2017	8	11	1.3125	854.5304778	Aug_Sept
1301	P	Carleton	2017	8	11	1.614583333	1103.363536	Aug_Sept
1302	P	Carleton	2017	8	11	0.65625	313.9621087	Aug_Sept
1303	P	Carleton	2017	8	11	1.229166667	785.8868756	Aug_Sept
1304	P	Carleton	2017	8	11	2.208333333	1592.449203	Aug_Sept
1305	P	Carleton	2017	8	11	0.479166667	168.0944539	Aug_Sept
1306	P	Carleton	2017	8	11	2.020833333	1438.001098	Aug_Sept
1307	P	Carleton	2017	8	15	0.927083333	537.0538163	Aug_Sept
1308	P	Carleton	2017	8	15	1.135416667	708.6628229	Aug_Sept
1309	P	Carleton	2017	8	15	4.03125	3094.028007	Aug_Sept
1310	P	Carleton	2017	8	15	4.895833333	3806.205381	Aug_Sept
1311	P	Carleton	2017	8	15	0.6875	339.7034596	Aug_Sept
1312	P	Carleton	2017	8	15	0.979166667	579.9560684	Aug_Sept
1313	P	Carleton	2017	8	15	1.125	700.0823723	Aug_Sept
1314	P	Carleton	2017	8	15	1.583333333	1077.622185	Aug_Sept
1315	P	Carleton	2017	8	20	0.645833333	305.3816582	Aug_Sept
1316	P	Carleton	2017	8	20	0.708333333	356.86436	Aug_Sept
1317	P	Carleton	2017	8	20	0.96875	571.3756178	Aug_Sept
1318	P	Carleton	2017	8	20	1.34375	880.2718287	Aug_Sept
1319	P	Carleton	2017	8	20	1.416666667	940.3349811	Aug_Sept
1320	P	Carleton	2017	8	20	0.84375	468.4102142	Aug_Sept
1321	P	Carleton	2017	8	20	0.927083333	537.0538163	Aug_Sept
1322	P	Carleton	2017	8	20	1.072916667	657.1801211	Aug_Sept
1323	P	Carleton	2017	8	20	1.260416667	811.6282265	Aug_Sept
1324	P	Carleton	2017	8	20	0.78125	416.9275124	Aug_Sept
1325	P	Carleton	2017	8	20	1.114583333	691.5019217	Aug_Sept
1326	P	Carleton	2017	8	20	1.0625	648.5996705	Aug_Sept
1327	P	Carleton	2017	8	20	0.833333333	459.8297636	Aug_Sept
1328	P	Carleton	2017	8	20	1.25	803.0477759	Aug_Sept
1329	P	Carleton	2017	8	20	1.322916667	863.1109283	Aug_Sept
1330	P	Carleton	2017	8	20	2.229166667	1609.610105	Aug_Sept
1331	P	Carleton	2017	8	23	0.864583333	485.5711145	Aug_Sept
1332	P	Carleton	2017	8	23	1.083333333	665.7605708	Aug_Sept
1333	P	Carleton	2017	8	23	1.333333333	871.6913781	Aug_Sept
1334	P	Carleton	2017	8	23	1.083333333	665.7605708	Aug_Sept
1335	P	Carleton	2017	8	23	1.03125	622.8583196	Aug_Sept
1336	P	Carleton	2017	8	23	1.260416667	811.6282265	Aug_Sept
1337	P	Carleton	2017	8	23	1.552083333	1051.880834	Aug_Sept
1338	P	Carleton	2017	8	23	1.104166667	682.921472	Aug_Sept
1339	P	Carleton	2017	8	23	1.489583333	1000.398133	Aug_Sept
1340	P	Carleton	2017	8	23	1.979166667	1403.679297	Aug_Sept
