# Supplementary material for: Do honey bee (Apis mellifera) foragers recruit their nestmates to native forbs in reconstructed prairie habitats?
Source: PLoS One. 2020 Feb 12;15(2):e0228169. doi: 10.1371/journal.pone.0228169 (PMC7015315; doi:10.1371/journal.pone.0228169)
Supplement: S5 Data — (CSV) [file pone.0228169.s005.csv]

site	site_UTM_easting	site_UTM_northing	site_latitude	site_longitude	video	colony	pollen_load_order	pollen_taxon	pollen_category	year	month	day	hour	minute	mean_angle_degrees_clockwise_fr_vertical	mean_duration_seconds
Belwin	516102	4976402.67	44.940869	-92.795909	MAH00046	4	1	Species group: Trifolium repens/hybridum	non_native	2015	6	29	14	11.19722222	100	2.183333333
Belwin	516102	4976402.67	44.940869	-92.795909	MAH00046	4	2	Species group: Trifolium repens/hybridum	non_native	2015	6	29	14	16.19	130.25	1.208333333
Belwin	516102	4976402.67	44.940869	-92.795909	MAH00046	4	3	Family: Rosaceae	unknown	2015	6	29	14	22.40388889	286	0.858333333
Belwin	516102	4976402.67	44.940869	-92.795909	MAH00046	4	4	Species group: Trifolium repens/hybridum	non_native	2015	6	29	14	23.43555556	126.75	2.35
Belwin	516102	4976402.67	44.940869	-92.795909	MAH00046	4	5	Species group: Trifolium repens/hybridum	non_native	2015	6	29	14	29.57333333	127.25	1.975
Belwin	516102	4976402.67	44.940869	-92.795909	MAH00046	4	6	Species group: Trifolium repens/hybridum	non_native	2015	6	29	14	33.11944444	111.25	2.241666667
Belwin	516102	4976402.67	44.940869	-92.795909	MAH00049	5	1	Species group: Trifolium pretense/incarnatum	non_native	2015	6	29	15	57.63277778	97	1.758333333
Belwin	516102	4976402.67	44.940869	-92.795909	MAH00049	5	2	Species: Lotus corniculatus	non_native	2015	6	29	16	25.075	345.5	1.45
Belwin	516102	4976402.67	44.940869	-92.795909	MAH00047	6	1	Species: Melilotus officinalis	non_native	2015	6	29	15	4.511111111	95	2.558333333
Belwin	516102	4976402.67	44.940869	-92.795909	MAH00047	6	2	Species: Melilotus officinalis	non_native	2015	6	29	15	6.077777778	89.5	2.566666667
Belwin	516102	4976402.67	44.940869	-92.795909	MAH00047	6	3	Species group: Trifolium pretense/incarnatum	non_native	2015	6	29	15	9.722777778	98.25	1.658333333
Belwin	516102	4976402.67	44.940869	-92.795909	MAH00047	6	4	Species group: Trifolium repens/hybridum	non_native	2015	6	29	15	29.76888889	95	1.85
Belwin	516102	4976402.67	44.940869	-92.795909	MAH00047	6	5	Species: Trifolium pretense/incarnatum	non_native	2015	6	29	15	35.50222222	84.5	1.85
Belwin	516102	4976402.67	44.940869	-92.795909	MAH00065	4	1	Species: Lotus corniculatus	non_native	2015	7	9	11	37.69277778	167.25	1.658333333
Belwin	516102	4976402.67	44.940869	-92.795909	MAH00065	4	2	Species: Securigera varia	non_native	2015	7	9	11	42.96333333	226.75	1.233333333
Belwin	516102	4976402.67	44.940869	-92.795909	MAH00065	4	3	Species group: Trifolium repens/hybridum	non_native	2015	7	9	11	44.96	154.75	1.408333333
Belwin	516102	4976402.67	44.940869	-92.795909	MAH00065	4	4	Species: Securigera varia	non_native	2015	7	9	11	47.06722222	231.75	1.366666667
Belwin	516102	4976402.67	44.940869	-92.795909	MAH00065	4	6	Species: Securigera varia	non_native	2015	7	9	11	51.75444444	267.75	2.183333333
Belwin	516102	4976402.67	44.940869	-92.795909	MAH00065	4	7	Species: Lotus corniculatus	non_native	2015	7	9	12	6.325555556	131	1.191666667
Belwin	516102	4976402.67	44.940869	-92.795909	MAH00065	4	8	Tribe: Mentheae	unknown	2015	7	9	12	9.802777778	36.5	2.291666667
Belwin	516102	4976402.67	44.940869	-92.795909	MAH00063	5	1	Genus: Tilia	native_non_prairie	2015	7	9	10	28.26611111	108.5	1.133333333
Belwin	516102	4976402.67	44.940869	-92.795909	MAH00063	5	2	Species group: Trifolium repens/hybridum	non_native	2015	7	9	10	32.07888889	206.75	1.733333333
Belwin	516102	4976402.67	44.940869	-92.795909	MAH00063	5	3	Species group: Trifolium pretense/incarnatum	non_native	2015	7	9	10	35.60111111	242.25	1.883333333
Belwin	516102	4976402.67	44.940869	-92.795909	MAH00063	5	4	Genus: Carduus	non_native	2015	7	9	10	39.52555556	165	1.533333333
Belwin	516102	4976402.67	44.940869	-92.795909	MAH00063	5	5	Genus: Carduus	non_native	2015	7	9	10	41.24777778	32.25	0.4
Belwin	516102	4976402.67	44.940869	-92.795909	MAH00063	5	6	Family: Brassicaceae	unknown	2015	7	9	10	42.88722222	199	1.725
Belwin	516102	4976402.67	44.940869	-92.795909	MAH00063	5	7	Species: Securigera varia	non_native	2015	7	9	10	46.00555556	260.75	1.833333333
Belwin	516102	4976402.67	44.940869	-92.795909	MAH00063	5	8	Species group: Trifolium repens/hybridum	non_native	2015	7	9	10	48.88111111	234	1.766666667
Belwin	516102	4976402.67	44.940869	-92.795909	MAH00063	5	9	Family: Brassicaceae	unknown	2015	7	9	10	51.39833333	203	1.8
Belwin	516102	4976402.67	44.940869	-92.795909	MAH00063	5	10	Family: Brassicaceae	unknown	2015	7	9	11	1.466666667	187.5	1.75
Belwin	516102	4976402.67	44.940869	-92.795909	MAH00062	6	1	Genus: Tilia	native_non_prairie	2015	7	9	10	9.733333333	159.25	0.733333333
Belwin	516102	4976402.67	44.940869	-92.795909	MAH00062	6	2	Genus: Tilia	native_non_prairie	2015	7	9	10	10.64166667	71	0.333333333
Belwin	516102	4976402.67	44.940869	-92.795909	MAH00066	6	3	Family: Brassicaceae	unknown	2015	7	9	12	33.53611111	152.25	1.716666667
Belwin	516102	4976402.67	44.940869	-92.795909	MAH00076	4	1	Species: Lotus corniculatus	non_native	2015	7	15	14	56.67666667	194.25	1.358333333
Belwin	516102	4976402.67	44.940869	-92.795909	MAH00076	4	2	Species: Lotus corniculatus	non_native	2015	7	15	15	3.085	144	1.741666667
Belwin	516102	4976402.67	44.940869	-92.795909	MAH00076	4	3	Species: Securigera varia	non_native	2015	7	15	15	9.318888889	75.75	1.525
Belwin	516102	4976402.67	44.940869	-92.795909	MAH00076	4	4	Species: Melilotus officinalis	non_native	2015	7	15	15	15.57277778	99.5	1.475
Belwin	516102	4976402.67	44.940869	-92.795909	MAH00076	4	6	Species: Lotus corniculatus	non_native	2015	7	15	15	35.72555556	25	1.658333333
Belwin	516102	4976402.67	44.940869	-92.795909	MAH00076	4	7	Species: Lotus corniculatus	non_native	2015	7	15	15	40.08555556	121.25	1.616666667
Belwin	516102	4976402.67	44.940869	-92.795909	MAH00074	5	1	unknown	unknown	2015	7	15	12	42.525	66.75	0.7
Belwin	516102	4976402.67	44.940869	-92.795909	MAH00074	5	2	Family: Apiaceae (not Zizia)	unknown	2015	7	15	12	44.335	114.75	2.891666667
Belwin	516102	4976402.67	44.940869	-92.795909	MAH00074	5	3	Species: Lotus corniculatus	non_native	2015	7	15	12	48.87	139	2.225
Belwin	516102	4976402.67	44.940869	-92.795909	MAH00074	5	4	Species group: Trifolium repens/hybridum	non_native	2015	7	15	12	55.28055556	234.5	0.633333333
Belwin	516102	4976402.67	44.940869	-92.795909	MAH00074	5	5	Species: Trifolium repens/hybridum	non_native	2015	7	15	13	10.83388889	182.5	0.925
Belwin	516102	4976402.67	44.940869	-92.795909	MAH00074	5	6	Species: Lotus cornciculatus	non_native	2015	7	15	13	15.19166667	154.75	1.691666667
Belwin	516102	4976402.67	44.940869	-92.795909	MAH00074	5	7	unknown	unknown	2015	7	15	13	24.99555556	12.25	3.775
Belwin	516102	4976402.67	44.940869	-92.795909	MAH00074	5	8	Species: Lotus corniculatus	non_native	2015	7	15	13	33.85111111	95	1.233333333
Belwin	516102	4976402.67	44.940869	-92.795909	MAH00075	6	1	Species: Lotus corniculatus	non_native	2015	7	15	13	50.56833333	81.5	1.625
Belwin	516102	4976402.67	44.940869	-92.795909	MAH00075	6	2	Species: Lotus corniculatus	non_native	2015	7	15	13	59.50166667	94.25	1.675
Belwin	516102	4976402.67	44.940869	-92.795909	MAH00075	6	3	Species group: Trifolium repens/hybridum	non_native	2015	7	15	14	13.56222222	151	1.141666667
Belwin	516102	4976402.67	44.940869	-92.795909	MAH00075	6	4	Species: Lotus corniculatus	non_native	2015	7	15	14	33.86611111	57.5	1.766666667
Belwin	516102	4976402.67	44.940869	-92.795909	MAH00075	6	5	Species: Melilotus officinalis	non_native	2015	7	15	14	35.76	184.75	0.525
Belwin	516102	4976402.67	44.940869	-92.795909	MAH00079	4	1	Genus: Agastache	native_prairie	2015	7	20	10	55.55944444	167	2.141666667
Belwin	516102	4976402.67	44.940869	-92.795909	MAH00079	4	2	Species: Melilotus officinalis	non_native	2015	7	20	11	2.872777778	197	1.7
Belwin	516102	4976402.67	44.940869	-92.795909	MAH00077	5	1	Family: Brassicaceae	unknown	2015	7	20	9	32.15	213.5	1.575
Belwin	516102	4976402.67	44.940869	-92.795909	MAH00077	5	2	Family: Brassicaceae	unknown	2015	7	20	9	37.05444444	212.75	1.75
Belwin	516102	4976402.67	44.940869	-92.795909	MAH00077	5	3	Genus: Agastache	native_prairie	2015	7	20	10	9.111111111	44.25	1.175
Belwin	516102	4976402.67	44.940869	-92.795909	MAH00077	5	4	Species: Lotus corniculatus	non_native	2015	7	20	10	12.31888889	172.5	1.8
Belwin	516102	4976402.67	44.940869	-92.795909	MAH00080	6	1	Species group: Trifolium pratense/incarnatum	non_native	2015	7	20	11	53.46833333	123	0.983333333
Belwin	516102	4976402.67	44.940869	-92.795909	MAH00080	6	2	Species: Lotus corniculatus	non_native	2015	7	20	11	56.58888889	146	0.983333333
Belwin	516102	4976402.67	44.940869	-92.795909	MAH00080	6	3	Species group: Trifolium repens/hybridum	non_native	2015	7	20	12	5.881111111	213	1.258333333
Belwin	516102	4976402.67	44.940869	-92.795909	MAH00080	6	4	Species: Arctium minus	non_native	2015	7	20	12	12.78111111	96.25	1.333333333
Belwin	516102	4976402.67	44.940869	-92.795909	MAH00080	6	5	Species: Arctium minus	non_native	2015	7	20	12	33.75111111	109.5	1.2
Belwin	516102	4976402.67	44.940869	-92.795909	MAH00080	6	6	Species group: Trifolium pratense/incarnatum	non_native	2015	7	20	12	37.50277778	87.25	1.233333333
Belwin	516102	4976402.67	44.940869	-92.795909	MAH00099	4	1	Species: Melilotus officinalis	non_native	2015	7	31	14	20.29277778	111.75	1.6
Belwin	516102	4976402.67	44.940869	-92.795909	MAH00099	4	2	Genus: Agastache	native_prairie	2015	7	31	14	22.33055556	276.75	1.116666667
Belwin	516102	4976402.67	44.940869	-92.795909	MAH00099	4	3	Species group: Trifolium pratense/incarnatum	non_native	2015	7	31	14	29.03277778	362	0.983333333
Belwin	516102	4976402.67	44.940869	-92.795909	MAH00099	4	4	Genus: Centaurea	non_native	2015	7	31	14	46.11944444	71.5	0.883333333
Belwin	516102	4976402.67	44.940869	-92.795909	MAH00099	4	5	Species: Melilotus officinalis	non_native	2015	7	31	14	58.475	154.5	1.25
Belwin	516102	4976402.67	44.940869	-92.795909	MAH00099	4	6	Species: Lotus corniculatus	non_native	2015	7	31	15	2.458333333	71.5	2.275
Belwin	516102	4976402.67	44.940869	-92.795909	MAH00100	5	1	Species: Lotus corniculatus	non_native	2015	7	31	15	20.90333333	52	1.758333333
Belwin	516102	4976402.67	44.940869	-92.795909	MAH00100	5	2	Genus: Solidago	native_prairie	2015	7	31	15	35.00833333	45.25	1.316666667
Belwin	516102	4976402.67	44.940869	-92.795909	MAH00100	5	3	Species group: Trifolium pratense/incarnatum	non_native	2015	7	31	15	43.87111111	380	0.741666667
Belwin	516102	4976402.67	44.940869	-92.795909	MAH00100	5	4	Genus: Solidago	native_prairie	2015	7	31	15	46.78555556	9	1.483333333
Belwin	516102	4976402.67	44.940869	-92.795909	MAH00100	5	5	Species: Lotus corniculatus	non_native	2015	7	31	15	55.75666667	54	1.208333333
Belwin	516102	4976402.67	44.940869	-92.795909	MAH00098	6	1	Species: Arctium minus	non_native	2015	7	31	13	31.08166667	115.75	1.208333333
Belwin	516102	4976402.67	44.940869	-92.795909	MAH00098	6	2	Species: Arctium minus	non_native	2015	7	31	13	34.07888889	273.5	0.683333333
Belwin	516102	4976402.67	44.940869	-92.795909	MAH00098	6	3	Genus: Parthenocissus	native_non_prairie	2015	7	31	13	39.02055556	116.75	0.875
Belwin	516102	4976402.67	44.940869	-92.795909	MAH00098	6	4	Genus: Centaurea	non_native	2015	7	31	13	46.05833333	114.25	1.383333333
Belwin	516102	4976402.67	44.940869	-92.795909	MAH00098	6	5	Genus: Agastache	native_prairie	2015	7	31	13	50.165	158.75	1.733333333
Belwin	516102	4976402.67	44.940869	-92.795909	MAH00098	6	6	Genus: Lonicera	unknown	2015	7	31	13	51.27111111	93.75	2.216666667
Belwin	516102	4976402.67	44.940869	-92.795909	MAH00098	6	7	Species group: Trifolium repens/hybridum	non_native	2015	7	31	13	54.13277778	137	0.908333333
Belwin	516102	4976402.67	44.940869	-92.795909	MAH00107	5	1	Tribe: Cichorieae (probably Taraxacum officinale)	non_native	2015	8	6	9	59.12277778	200.5	1.483333333
Belwin	516102	4976402.67	44.940869	-92.795909	MAH00109	6	1	Species: Lotus corniculatus	non_native	2015	8	6	11	48.89	239.75	0.6
Belwin	516102	4976402.67	44.940869	-92.795909	MAH00113	4	1	Species group: Trifolium pratense/incarnatum	non_native	2015	8	7	11	33.50111111	109.75	0.65
Belwin	516102	4976402.67	44.940869	-92.795909	MAH00113	4	2	Species: Lotus corniculatus	non_native	2015	8	7	11	34.97722222	273.5	0.658333333
Belwin	516102	4976402.67	44.940869	-92.795909	MAH00113	4	3	Species group: Trifolium pratense/incarnatum	non_native	2015	8	7	11	36.55055556	56.75	0.616666667
Belwin	516102	4976402.67	44.940869	-92.795909	MAH00113	4	4	Species group: Trifolium pratense/incarnatum	non_native	2015	8	7	11	42.74611111	118.75	0.641666667
Belwin	516102	4976402.67	44.940869	-92.795909	MAH00113	4	5	Species group: Trifolium repens/hybridum	non_native	2015	8	7	11	57.70277778	214.25	1.216666667
Belwin	516102	4976402.67	44.940869	-92.795909	MAH00113	4	6	Species group: Trifolium repens/hybridum	non_native	2015	8	7	12	4.039444444	167.25	1.525
Belwin	516102	4976402.67	44.940869	-92.795909	MAH00113	4	7	Species: Melilotus officinalis	non_native	2015	8	7	12	5.402222222	175	1.6
Belwin	516102	4976402.67	44.940869	-92.795909	MAH00113	4	8	Species group: Trifolium pratense/incarnatum	non_native	2015	8	7	12	11.01944444	58.25	1.041666667
Belwin	516102	4976402.67	44.940869	-92.795909	MAH00112	5	2	Species group: Trifolium pratense/incarnatum	non_native	2015	8	7	10	38.94166667	199.25	1.041666667
Belwin	516102	4976402.67	44.940869	-92.795909	MAH00112	5	3	Genus: Agastache	native_prairie	2015	8	7	10	43.89055556	19.75	0.666666667
Belwin	516102	4976402.67	44.940869	-92.795909	MAH00112	5	4	Species group: Trifolium pratense/incarnatum	non_native	2015	8	7	10	47.35388889	203.5	0.691666667
Belwin	516102	4976402.67	44.940869	-92.795909	MAH00112	5	5	unknown	unknown	2015	8	7	11	7.983333333	305.5	0.308333333
Belwin	516102	4976402.67	44.940869	-92.795909	MAH00112	5	6	Genus: Alisma	native_non_prairie	2015	8	7	11	19.16277778	-3	0.683333333
Belwin	516102	4976402.67	44.940869	-92.795909	MAH00111	6	2	unknown	unknown	2015	8	7	9	36.32888889	169	2.075
Belwin	516102	4976402.67	44.940869	-92.795909	MAH00111	6	3	unknown	unknown	2015	8	7	9	45.00722222	163.5	3.233333333
Belwin	516102	4976402.67	44.940869	-92.795909	MAH00111	6	4	unknown	unknown	2015	8	7	9	59.00444444	97.5	1.191666667
Belwin	516102	4976402.67	44.940869	-92.795909	MAH00111	6	5	Family: Brassicaceae	unknown	2015	8	7	10	2.636111111	210	1.775
Belwin	516102	4976402.67	44.940869	-92.795909	MAH00111	6	6	unknown	unknown	2015	8	7	10	5.468333333	155.5	1.958333333
Belwin	516102	4976402.67	44.940869	-92.795909	MAH00131	4	2	Species: Lotus corniculatus	non_native	2015	8	14	14	38.11833333	94.75	1.875
Belwin	516102	4976402.67	44.940869	-92.795909	MAH00131	4	3	Species: Lotus corniculatus	non_native	2015	8	14	14	43.20277778	98.25	1.466666667
Belwin	516102	4976402.67	44.940869	-92.795909	MAH00131	4	4	Species: Melilotus officinalis	non_native	2015	8	14	14	54.53388889	157.5	1.066666667
Belwin	516102	4976402.67	44.940869	-92.795909	MAH00131	4	5	Species: Melilotus officinalis	non_native	2015	8	14	14	55.40777778	-145	1.116666667
Belwin	516102	4976402.67	44.940869	-92.795909	MAH00131	4	6	Species: Melilotus officinalis	non_native	2015	8	14	14	59.16833333	154.25	0.45
Belwin	516102	4976402.67	44.940869	-92.795909	MAH00131	4	7	Family: Rosaceae	unknown	2015	8	14	15	1.755	314.25	0.841666667
Belwin	516102	4976402.67	44.940869	-92.795909	MAH00131	4	8	Species: Melilotus officinalis	non_native	2015	8	14	15	16.07166667	203.25	1.016666667
Belwin	516102	4976402.67	44.940869	-92.795909	MAH00131	4	9	Species: Lotus corniculatus	non_native	2015	8	14	15	19.18833333	68.5	2
Belwin	516102	4976402.67	44.940869	-92.795909	MAH00129	5	1	Genus: Tanacetum	non_native	2015	8	14	12	40.13277778	83.75	1.616666667
Belwin	516102	4976402.67	44.940869	-92.795909	MAH00129	5	2	Species group: Trifolium repens/hybridum	non_native	2015	8	14	12	42.085	144	1.425
Belwin	516102	4976402.67	44.940869	-92.795909	MAH00129	5	3	Genus: Solidago	native_prairie	2015	8	14	12	48.79	93.25	1.758333333
Belwin	516102	4976402.67	44.940869	-92.795909	MAH00129	5	4	unknown	unknown	2015	8	14	12	58.64722222	154.75	1.008333333
Belwin	516102	4976402.67	44.940869	-92.795909	MAH00129	5	5	Species: Melilotus officinalis	non_native	2015	8	14	13	13.79	184.75	0.775
Belwin	516102	4976402.67	44.940869	-92.795909	MAH00129	5	6	unknown	unknown	2015	8	14	13	27.56	330.75	0.458333333
Belwin	516102	4976402.67	44.940869	-92.795909	MAH00130	6	1	Species: Melilotus officinalis	non_native	2015	8	14	13	51.77166667	76.5	1.1
Belwin	516102	4976402.67	44.940869	-92.795909	MAH00130	6	2	Species: Lotus corniculatus	non_native	2015	8	14	13	58.57611111	110.25	1.716666667
Belwin	516102	4976402.67	44.940869	-92.795909	MAH00130	6	3	Species: Melilotus officinalis	non_native	2015	8	14	14	3.476111111	195.75	0.625
Belwin	516102	4976402.67	44.940869	-92.795909	MAH00137	4	1	Family: Asteraceae	unknown	2015	8	20	11	55.80111111	213.75	0.9
Belwin	516102	4976402.67	44.940869	-92.795909	MAH00136	5	1	unknown	unknown	2015	8	20	10	41.04222222	166.25	1.808333333
Belwin	516102	4976402.67	44.940869	-92.795909	MAH00136	5	2	Tribe: Mentheae	unknown	2015	8	20	10	47.13388889	26	1.1
Belwin	516102	4976402.67	44.940869	-92.795909	MAH00136	5	3	Family: Asteraceae	unknown	2015	8	20	10	53.07388889	193	0.991666667
Belwin	516102	4976402.67	44.940869	-92.795909	MAH00136	5	4	Genus: Ambrosia	native_prairie	2015	8	20	10	59.99388889	194.25	1.558333333
Belwin	516102	4976402.67	44.940869	-92.795909	MAH00136	5	5	unknown	unknown	2015	8	20	11	2.744444444	292.5	1.566666667
Belwin	516102	4976402.67	44.940869	-92.795909	MAH00136	5	6	unknown	unknown	2015	8	20	11	12.84166667	346	0.633333333
Belwin	516102	4976402.67	44.940869	-92.795909	MAH00141	4	1	Genus: Solidago	native_prairie	2015	8	24	13	26.07111111	173.75	0.991666667
Belwin	516102	4976402.67	44.940869	-92.795909	MAH00141	4	2	Genus: Alisma	native_non_prairie	2015	8	24	13	28.31	289.25	1.108333333
Belwin	516102	4976402.67	44.940869	-92.795909	MAH00141	4	3	Genus: Solidago	native_prairie	2015	8	24	13	35.39777778	181.75	1.075
Belwin	516102	4976402.67	44.940869	-92.795909	MAH00141	4	5	Genus: Solidago	native_prairie	2015	8	24	13	59.74	170.5	0.766666667
Belwin	516102	4976402.67	44.940869	-92.795909	MAH00141	4	6	Genus: Alisma	native_non_prairie	2015	8	24	14	2.307222222	261.25	0.983333333
Belwin	516102	4976402.67	44.940869	-92.795909	MAH00150	5	1	Family: Asteraceae	unknown	2015	8	26	13	38.67444444	188.25	0.65
Belwin	516102	4976402.67	44.940869	-92.795909	MAH00150	5	3	Family: Asteraceae	unknown	2015	8	26	14	0.452777778	38.75	2.125
Belwin	516102	4976402.67	44.940869	-92.795909	MAH00150	5	4	Genus: Solidago	native_prairie	2015	8	26	14	2.063333333	191.5	0.525
Belwin	516102	4976402.67	44.940869	-92.795909	MAH00150	5	5	Genus: Solidago	native_prairie	2015	8	26	14	12.67055556	150.5	0.733333333
Belwin	516102	4976402.67	44.940869	-92.795909	MAH00150	5	6	Tribe: Anthemideae	non_native	2015	8	26	14	19.04222222	24.75	1.466666667
Belwin	516102	4976402.67	44.940869	-92.795909	MAH00152	6	1	Genus: Solidago	native_prairie	2015	8	26	15	2.185555556	125	0.416666667
Belwin	516102	4976402.67	44.940869	-92.795909	MAH00152	6	2	Species: Melilotus officinalis	non_native	2015	8	26	15	17.13666667	118.5	1.325
Belwin	516102	4976402.67	44.940869	-92.795909	MAH00152	6	3	Species: Lotus corniculatus	non_native	2015	8	26	15	28.98222222	77.25	1.566666667
Belwin	516102	4976402.67	44.940869	-92.795909	MAH00152	6	4	Family:Asteraceae	unknown	2015	8	26	15	42.65	65	1.241666667
Belwin	516102	4976402.67	44.940869	-92.795909	MAH00157	4	1	Genus: Taraxacum	non_native	2015	9	1	10	19.39666667	230.75	0.966666667
Belwin	516102	4976402.67	44.940869	-92.795909	MAH00157	4	2	unknown	unknown	2015	9	1	10	27.65666667	136.75	1.591666667
Belwin	516102	4976402.67	44.940869	-92.795909	MAH00157	4	3	Species group: Trifolium pratense/incarnatum	non_native	2015	9	1	10	28.97	111.25	0.933333333
Belwin	516102	4976402.67	44.940869	-92.795909	MAH00157	4	4	Family:Asteraceae	unknown	2015	9	1	10	31.28666667	13.75	0.466666667
Belwin	516102	4976402.67	44.940869	-92.795909	MAH00157	4	5	Species: Melilotus officinalis	non_native	2015	9	1	10	45.51833333	165.75	1.383333333
Belwin	516102	4976402.67	44.940869	-92.795909	MAH00157	4	6	unknown	unknown	2015	9	1	10	53.17777778	39.75	0.708333333
Belwin	516102	4976402.67	44.940869	-92.795909	MAH00157	4	7	Species group: Trifolium repens/hybridum	non_native	2015	9	1	11	1.562777778	249.75	1.05
Belwin	516102	4976402.67	44.940869	-92.795909	MAH00157	4	8	Genus: Alisma	native_non_prairie	2015	9	1	11	6.591111111	354	1.275
Belwin	516102	4976402.67	44.940869	-92.795909	MAH00158	5	1	Family:Asteraceae	unknown	2015	9	1	11	24.27722222	118.25	1.608333333
Belwin	516102	4976402.67	44.940869	-92.795909	MAH00158	5	2	unknown	unknown	2015	9	1	11	28.66055556	141	1.9
Belwin	516102	4976402.67	44.940869	-92.795909	MAH00158	5	3	Family:Asteraceae	unknown	2015	9	1	11	31.73277778	0.5	0.491666667
Belwin	516102	4976402.67	44.940869	-92.795909	MAH00158	5	4	unknown	unknown	2015	9	1	11	34.42	86	0.783333333
Belwin	516102	4976402.67	44.940869	-92.795909	MAH00158	5	5	Family:Asteraceae	unknown	2015	9	1	11	40.76166667	146.5	1.758333333
Belwin	516102	4976402.67	44.940869	-92.795909	MAH00158	5	6	unknown	unknown	2015	9	1	11	45.58277778	138	0.966666667
Belwin	516102	4976402.67	44.940869	-92.795909	MAH00158	5	7	Family:Asteraceae	unknown	2015	9	1	12	0.946666667	121.5	1.45
Belwin	516102	4976402.67	44.940869	-92.795909	MAH00158	5	8	unknown	unknown	2015	9	1	12	8.566111111	348.25	0.566666667
Belwin	516102	4976402.67	44.940869	-92.795909	MAH00156	6	1	Genus: Alisma	native_non_prairie	2015	9	1	9	41.275	17.5	0.766666667
Belwin	516102	4976402.67	44.940869	-92.795909	MAH00156	6	2	Genus: Rhus	native_non_prairie	2015	9	1	9	44.37333333	18.25	0.85
Belwin	516102	4976402.67	44.940869	-92.795909	MAH00156	6	3	Genus: Alisma	native_non_prairie	2015	9	1	9	47.16277778	21.25	1.025
Belwin	516102	4976402.67	44.940869	-92.795909	MAH00156	6	4	Genus: Rhus	native_non_prairie	2015	9	1	9	51.38	309	2.541666667
Belwin	516102	4976402.67	44.940869	-92.795909	MAH00156	6	5	Genus: Rhus	native_non_prairie	2015	9	1	9	53.125	271.5	2.35
Belwin	516102	4976402.67	44.940869	-92.795909	MAH00171	7	1	Genus: Rhamnus	non_native	2016	5	17	13	37.52277778	115.25	0.475
Belwin	516102	4976402.67	44.940869	-92.795909	MAH00171	7	2	Genus: Rhamnus	non_native	2016	5	17	13	51.96166667	158	0.675
Belwin	516102	4976402.67	44.940869	-92.795909	MAH00171	7	3	Genus: Rhamnus	non_native	2016	5	17	13	58.09111111	185.75	0.433333333
Belwin	516102	4976402.67	44.940869	-92.795909	MAH00171	7	4	Family: Brassicaceae	unknown	2016	5	17	14	2.615	153.25	2.083333333
Belwin	516102	4976402.67	44.940869	-92.795909	MAH00170	8	1	Genus: Rhamnus	non_native	2016	5	17	12	22.27666667	164	1.441666667
Belwin	516102	4976402.67	44.940869	-92.795909	MAH00170	8	2	Genus: Prunus	native_non_prairie	2016	5	17	12	23.60388889	176.5	0.325
Belwin	516102	4976402.67	44.940869	-92.795909	MAH00170	8	3	Genus: Rhamnus	non_native	2016	5	17	12	32.67888889	154.75	0.791666667
Belwin	516102	4976402.67	44.940869	-92.795909	MAH00170	8	4	Genus: Quercus	native_non_prairie	2016	5	17	12	34.14277778	263	0.375
Belwin	516102	4976402.67	44.940869	-92.795909	MAH00170	8	5	Species: Acer tataricum	non_native	2016	5	17	12	35.46333333	92.25	0.375
Belwin	516102	4976402.67	44.940869	-92.795909	MAH00169	9	1	Genus: Rhamnus	non_native	2016	5	17	10	28.39111111	216.25	0.558333333
Belwin	516102	4976402.67	44.940869	-92.795909	MAH00169	9	2	Tribe: Mentheae	unknown	2016	5	17	10	53.04666667	100	0.383333333
Belwin	516102	4976402.67	44.940869	-92.795909	MAH00169	9	3	Genus: Rhamnus	non_native	2016	5	17	10	55.43333333	215.5	0.366666667
Belwin	516102	4976402.67	44.940869	-92.795909	MAH00188	9	1	Genus: Acer	unknown	2016	5	24	13	58.40888889	159.25	0.45
Belwin	516102	4976402.67	44.940869	-92.795909	MAH00188	9	2	Genus: Rhamnus	non_native	2016	5	24	14	9.697222222	256.25	0.458333333
Belwin	516102	4976402.67	44.940869	-92.795909	MAH00188	9	3	Genus: Acer	unknown	2016	5	24	14	45.09277778	92.5	2.141666667
Belwin	516102	4976402.67	44.940869	-92.795909	MAH00188	9	4	unknown	unknown	2016	5	24	14	47.65833333	56.5	2.291666667
Belwin	516102	4976402.67	44.940869	-92.795909	MAH00196	7	1	Family: Rutaceae	unknown	2016	6	1	10	46.95	347.5	1.008333333
Belwin	516102	4976402.67	44.940869	-92.795909	MAH00196	7	2	Species: Gleditsia triacanthos	native_non_prairie	2016	6	1	10	56.44111111	317.25	1.9
Belwin	516102	4976402.67	44.940869	-92.795909	MAH00196	7	3	Family: Rutaceae	unknown	2016	6	1	11	12.44666667	157	1.175
Belwin	516102	4976402.67	44.940869	-92.795909	MAH00196	7	4	Genus: Celastrus	unknown	2016	6	1	11	13.73722222	291.5	0.725
Belwin	516102	4976402.67	44.940869	-92.795909	MAH00195	8	1	Family: Rutaceae	unknown	2016	6	1	9	40.62333333	3.25	0.666666667
Belwin	516102	4976402.67	44.940869	-92.795909	MAH00195	8	2	Species: Gleditsia triacanthos	native_non_prairie	2016	6	1	10	17.33611111	279.75	1.741666667
Belwin	516102	4976402.67	44.940869	-92.795909	MAH00197	9	1	Species: Gleditsia triacanthos	native_non_prairie	2016	6	1	11	40.11722222	282.5	1.566666667
Belwin	516102	4976402.67	44.940869	-92.795909	MAH00197	9	2	Species: Gleditsia triacanthos	native_non_prairie	2016	6	1	11	52.28555556	165.75	1.708333333
Belwin	516102	4976402.67	44.940869	-92.795909	MAH00197	9	3	Family: Rutaceae	unknown	2016	6	1	12	16.38611111	285	0.516666667
Belwin	516102	4976402.67	44.940869	-92.795909	MAH00210	7	1	Family: Rosaceae	unknown	2016	6	8	10	51.07388889	286	2.458333333
Belwin	516102	4976402.67	44.940869	-92.795909	MAH00210	7	2	Family: Brassicaceae	unknown	2016	6	8	10	57.055	197.25	1.883333333
Belwin	516102	4976402.67	44.940869	-92.795909	MAH00210	7	3	Family: Brassicaceae	unknown	2016	6	8	11	22.03333333	314.25	2.391666667
Belwin	516102	4976402.67	44.940869	-92.795909	MAH00208	8	1	Genus: Cornus	native_non_prairie	2016	6	8	10	9.471111111	95.5	0.391666667
Belwin	516102	4976402.67	44.940869	-92.795909	MAH00208	8	2	Family: Poaceae	unknown	2016	6	8	10	13.78388889	37	0.333333333
Belwin	516102	4976402.67	44.940869	-92.795909	MAH00211	9	1	Genus: Elaeagnus	unknown	2016	6	8	11	44.13333333	212.5	2.366666667
Belwin	516102	4976402.67	44.940869	-92.795909	MAH00211	9	2	Genus: Elaeagnus	unknown	2016	6	8	11	53.26055556	251	2.975
Belwin	516102	4976402.67	44.940869	-92.795909	MAH00211	9	3	Family: Poaceae	unknown	2016	6	8	11	55.46777778	332.25	0.308333333
Belwin	516102	4976402.67	44.940869	-92.795909	MAH00211	9	4	Family: Brassicaceae	unknown	2016	6	8	11	56.31055556	5.25	2.766666667
Belwin	516102	4976402.67	44.940869	-92.795909	MAH00211	9	5	Species: Securigera varia	non_native	2016	6	8	11	58.54388889	214.75	2.591666667
Belwin	516102	4976402.67	44.940869	-92.795909	MAH00211	9	6	Species group: Trifolium repens/hybridum	non_native	2016	6	8	12	4.606111111	221.75	3.158333333
Belwin	516102	4976402.67	44.940869	-92.795909	MAH00211	9	7	Species group: Trifolium repens/hybridum	non_native	2016	6	8	12	7.037222222	229.5	2.475
Belwin	516102	4976402.67	44.940869	-92.795909	MAH00211	9	8	Species group: Trifolium repens/hybridum	non_native	2016	6	8	12	24.35111111	138.5	6.458333333
Belwin	516102	4976402.67	44.940869	-92.795909	MAH00219	7	1	Species group: Trifolium repens/hybridum	non_native	2016	6	15	14	51.26722222	143.5	1.133333333
Belwin	516102	4976402.67	44.940869	-92.795909	MAH00219	7	2	Species group: Trifolium repens/hybridum	non_native	2016	6	15	14	54.77111111	141	0.925
Belwin	516102	4976402.67	44.940869	-92.795909	MAH00219	7	3	Species: Melilotus officinalis	non_native	2016	6	15	14	58.30888889	59	1.833333333
Belwin	516102	4976402.67	44.940869	-92.795909	MAH00219	7	4	Family: Rosaceae	unknown	2016	6	15	15	11.11166667	253.25	0.366666667
Belwin	516102	4976402.67	44.940869	-92.795909	MAH00218	8	1	Family: Rosaceae	unknown	2016	6	15	13	50.125	171.5	0.85
Belwin	516102	4976402.67	44.940869	-92.795909	MAH00218	8	2	Species: Lotus cornicolatus	non_native	2016	6	15	13	53.37277778	98.5	2.1
Belwin	516102	4976402.67	44.940869	-92.795909	MAH00218	8	3	Species: Lotus corniculatus	non_native	2016	6	15	14	3.774444444	120.25	1.433333333
Belwin	516102	4976402.67	44.940869	-92.795909	MAH00218	8	4	Species: Lotus corniculatus	non_native	2016	6	15	14	11.99111111	140.75	1.383333333
Belwin	516102	4976402.67	44.940869	-92.795909	MAH00218	8	5	Species: Lotus corniculatus	non_native	2016	6	15	14	35.32777778	59.25	1.741666667
Belwin	516102	4976402.67	44.940869	-92.795909	MAH00220	9	1	unknown	unknown	2016	6	15	15	44.43777778	60	1.683333333
Belwin	516102	4976402.67	44.940869	-92.795909	MAH00220	9	2	Species: Melilotus officinalis	non_native	2016	6	15	15	45.84555556	102.5	1.366666667
Belwin	516102	4976402.67	44.940869	-92.795909	MAH00220	9	3	Mixed: Family: Rosaceae; Family: Asteraceae	unknown	2016	6	15	15	48.54333333	243.25	0.733333333
Belwin	516102	4976402.67	44.940869	-92.795909	MAH00220	9	4	Species: Lotus corniculatus	non_native	2016	6	15	15	53.28055556	62.75	1.525
Belwin	516102	4976402.67	44.940869	-92.795909	MAH00220	9	5	Species: Lotus corniculatus	non_native	2016	6	15	16	18	98	1.541666667
Belwin	516102	4976402.67	44.940869	-92.795909	MAH00220	9	6	Species: Melilotus officinalis	non_native	2016	6	15	16	20.16666667	117.5	2.041666667
Belwin	516102	4976402.67	44.940869	-92.795909	MAH00220	9	7	Species: Lotus corniculatus	non_native	2016	6	15	16	28.41	114.25	0.958333333
Belwin	516102	4976402.67	44.940869	-92.795909	MAH00236	7	1	Species: Lotus corniculatus	non_native	2016	6	24	12	23.21611111	143	1.491666667
Belwin	516102	4976402.67	44.940869	-92.795909	MAH00236	7	2	Species group: Trifolium repens/hybridum	non_native	2016	6	24	12	25.61944444	222.5	2.125
Belwin	516102	4976402.67	44.940869	-92.795909	MAH00236	7	3	Species: Lotus corniculatus	non_native	2016	6	24	12	32.65555556	197	1.841666667
Belwin	516102	4976402.67	44.940869	-92.795909	MAH00236	7	4	Species: Securigera varia	non_native	2016	6	24	12	41.93111111	228.75	1.891666667
Belwin	516102	4976402.67	44.940869	-92.795909	MAH00234	8	1	Species group: Trifolium repens/hybridum	non_native	2016	6	24	11	48.41388889	258.5	2.166666667
Belwin	516102	4976402.67	44.940869	-92.795909	MAH00235	8	2	Species group: Trifolium repens/hybridum	non_native	2016	6	24	11	58.10555556	231.25	0.975
Belwin	516102	4976402.67	44.940869	-92.795909	MAH00233	9	1	Species group: Trifolium repens/hybridum	non_native	2016	6	24	10	42.14611111	264.25	2.566666667
Belwin	516102	4976402.67	44.940869	-92.795909	MAH00233	9	2	Species: Lotus corniculatus	non_native	2016	6	24	10	45.24	224.5	1.583333333
Belwin	516102	4976402.67	44.940869	-92.795909	MAH00233	9	3	Species group: Trifolium repens/hybridum	non_native	2016	6	24	10	47.79722222	264.75	2.766666667
Belwin	516102	4976402.67	44.940869	-92.795909	MAH00233	9	4	Species: Lotus corniculatus	non_native	2016	6	24	10	52.795	187	2.025
Belwin	516102	4976402.67	44.940869	-92.795909	MAH00233	9	5	Species: Lotus corniculatus	non_native	2016	6	24	10	57.58888889	197	1.683333333
Belwin	516102	4976402.67	44.940869	-92.795909	MAH00233	9	6	Species: Digitalis lanata	non_native	2016	6	24	11	0.177222222	354.25	1.45
Carleton	488948.76	4923159.06	44.46165278	-93.13892222	MAH00026	1	A	Species: Securigera varia	non_native	2017	6	16	11	39.68263889	65.25	0.572916667
Carleton	488948.76	4923159.06	44.46165278	-93.13892222	MAH00027	3	A	Genus: Brassica	non_native	2017	6	16	11	56.08125	-112.5	2.364583333
Carleton	488948.76	4923159.06	44.46165278	-93.13892222	MAH00027	3	B	Species group: Trifolium repens/hybridum	non_native	2017	6	16	12	1.747916667	-89.5	1.28125
Carleton	488948.76	4923159.06	44.46165278	-93.13892222	MAH00027	3	C	Species group: Trifolium repens/hybridum	non_native	2017	6	16	12	6.084027778	-105.75	1.4375
Carleton	488948.76	4923159.06	44.46165278	-93.13892222	MAH00027	3	D	Genus: Brassica	non_native	2017	6	16	12	16.13402778	-105	1.541666667
Carleton	488948.76	4923159.06	44.46165278	-93.13892222	MAH00032	1	A	Species group: Trifolium repens/hybridum	non_native	2017	6	23	13	30.39791667	-161.25	1.572916667
Carleton	488948.76	4923159.06	44.46165278	-93.13892222	MAH00032	1	B	Species group: Trifolium repens/hybridum	non_native	2017	6	23	13	49.78888889	19	0.791666667
Carleton	488948.76	4923159.06	44.46165278	-93.13892222	MAH00034	2	A	Tribe: Anthemideae (most likely Leucanthemum vulgare)	non_native	2017	6	23	15	15.75138889	37	1.40625
Carleton	488948.76	4923159.06	44.46165278	-93.13892222	MAH00034	2	B	Species: Lotus corniculatus	non_native	2017	6	23	15	19.24513889	140	0.5
Carleton	488948.76	4923159.06	44.46165278	-93.13892222	MAH00034	2	C	Species group: Trifolium repens/hybridum	non_native	2017	6	23	15	32.71458333	136	0.677083333
Carleton	488948.76	4923159.06	44.46165278	-93.13892222	MAH00034	2	D	Species group: Trifolium repens/hybridum	non_native	2017	6	23	15	35.98819444	151.25	1.28125
Carleton	488948.76	4923159.06	44.46165278	-93.13892222	MAH00034	2	E	Genus: Rhus	native_non_prairie	2017	6	23	15	44.70208333	-148.5	1.364583333
Carleton	488948.76	4923159.06	44.46165278	-93.13892222	MAH00034	2	F	Sub-family: Apioideae (not Zizia)	unknown	2017	6	23	16	1.013888889	112.25	3.0625
Carleton	488948.76	4923159.06	44.46165278	-93.13892222	MAH00033	3	A	Genus: Rhus	native_non_prairie	2017	6	23	14	44.36875	130	1.8125
Carleton	488948.76	4923159.06	44.46165278	-93.13892222	MAH00033	3	B	Genus: Rhus	native_non_prairie	2017	6	23	14	56.45208333	6.5	0.9375
Carleton	488948.76	4923159.06	44.46165278	-93.13892222	MAH00033	3	C	Species group: Trifolium repens/hybridum	non_native	2017	6	23	14	59.72777778	153.6666667	0.902777778
Carleton	488948.76	4923159.06	44.46165278	-93.13892222	MAH00003	1	A	Species: Dalea purpurea	native_prairie	2017	7	3	10	29.69652778	-154.75	0.739583333
Carleton	488948.76	4923159.06	44.46165278	-93.13892222	MAH00003	1	C	Species: Dalea purpurea	native_prairie	2017	7	3	10	32.24861111	-104.5	0.65625
Carleton	488948.76	4923159.06	44.46165278	-93.13892222	MAH00003	1	D	Sub-family: Apioideae (not Zizia)	unknown	2017	7	3	10	37.60208333	-160	0.822916667
Carleton	488948.76	4923159.06	44.46165278	-93.13892222	MAH00003	1	E	Species group: Trifolium repens/hybridum	non_native	2017	7	3	10	41.61180556	-77.25	2.114583333
Carleton	488948.76	4923159.06	44.46165278	-93.13892222	MAH00003	1	F	Genus: Rhus	native_non_prairie	2017	7	3	10	47.46944444	-130.5	0.625
Carleton	488948.76	4923159.06	44.46165278	-93.13892222	MAH00003	1	G	Genus: Coriandrum	non_native	2017	7	3	11	2.170138889	-105.25	1.364583333
Carleton	488948.76	4923159.06	44.46165278	-93.13892222	MAH00002	2	A	Genus: Silene	unknown	2017	7	3	9	52.21805556	-134.5	1
Carleton	488948.76	4923159.06	44.46165278	-93.13892222	MAH00002	2	B	Mixed- Genus: Tilia; Genus Alisma; Species group: Trifolium repens/hybridum	unknown	2017	7	3	10	16.79375	94.5	2.020833333
Carleton	488948.76	4923159.06	44.46165278	-93.13892222	MAH00004	3	A	Genus: Brassica	non_native	2017	7	3	12	5.138888889	-158	1.0625
Carleton	488948.76	4923159.06	44.46165278	-93.13892222	MAH00004	3	B	Genus: Parthenicissus	native_non_prairie	2017	7	3	12	13.29583333	107.5	0.895833333
Carleton	488948.76	4923159.06	44.46165278	-93.13892222	MAH00020	1	A	Species: Dalea candida	native_prairie	2017	7	10	14	31.8875	135.25	0.65625
Carleton	488948.76	4923159.06	44.46165278	-93.13892222	MAH00020	1	B	Species group: Trifolium repens/hybridum	non_native	2017	7	10	14	34.06041667	140.75	0.53125
Carleton	488948.76	4923159.06	44.46165278	-93.13892222	MAH00020	1	C	Species: Dalea candida	native_prairie	2017	7	10	14	52.78611111	134.75	0.729166667
Carleton	488948.76	4923159.06	44.46165278	-93.13892222	MAH00021	2	A	Species: Arctium minus	non_native	2017	7	10	15	21.44791667	13.75	1.114583333
Carleton	488948.76	4923159.06	44.46165278	-93.13892222	MAH00021	2	B	Species: Arctium minus	non_native	2017	7	10	15	24.38402778	-120.75	0.84375
Carleton	488948.76	4923159.06	44.46165278	-93.13892222	MAH00021	2	C	Species group: Trifolium repens/hybridum	non_native	2017	7	10	15	32.44791667	136.5	0.71875
Carleton	488948.76	4923159.06	44.46165278	-93.13892222	MAH00021	2	D	Species: Dalea candida	native_prairie	2017	7	10	15	34.40694444	109.5	1.125
Carleton	488948.76	4923159.06	44.46165278	-93.13892222	MAH00021	2	E	Species group: Trifolium repens/hybridum	non_native	2017	7	10	15	44.22430556	-54.75	2.791666667
Carleton	488948.76	4923159.06	44.46165278	-93.13892222	MAH00019	3	A	Genus: Parthenocissus	native_non_prairie	2017	7	10	13	9.625	-40.25	0.708333333
Carleton	488948.76	4923159.06	44.46165278	-93.13892222	MAH00019	3	C	Genus: Parthenocissus	native_non_prairie	2017	7	10	13	44.07638889	-27	0.791666667
Carleton	488948.76	4923159.06	44.46165278	-93.13892222	MAH00019	3	D	Species group: Trifolium repens/hybridum	non_native	2017	7	10	13	51.48402778	158.25	0.916666667
Carleton	488948.76	4923159.06	44.46165278	-93.13892222	MAH00019	1	A	Species: Dalea purpurea	native_prairie	2017	7	17	10	0.094444444	-97.25	0.9375
Carleton	488948.76	4923159.06	44.46165278	-93.13892222	MAH00019	1	B	Species group: Trifolium repens/hybridum	non_native	2017	7	17	10	3.0375	-154.25	1.291666667
Carleton	488948.76	4923159.06	44.46165278	-93.13892222	MAH00019	1	C	Species: Dalea candida	native_prairie	2017	7	17	10	10.26597222	-119.75	0.84375
Carleton	488948.76	4923159.06	44.46165278	-93.13892222	MAH00020	2	A	Species: Dalea purpurea	native_prairie	2017	7	17	10	24.24930556	-102.25	0.96875
Carleton	488948.76	4923159.06	44.46165278	-93.13892222	MAH00020	2	B	Species group: Trifolium repens/hybridum	non_native	2017	7	17	10	30.34305556	75.25	0.71875
Carleton	488948.76	4923159.06	44.46165278	-93.13892222	MAH00020	2	D	Species: Arctium minus	non_native	2017	7	17	10	23	-100.3333333	1.083333333
Carleton	488948.76	4923159.06	44.46165278	-93.13892222	MAH00020	2	E	Species group: Trifolium repens/hybridum	non_native	2017	7	17	10	56.03888889	-114.25	0.65625
Carleton	488948.76	4923159.06	44.46165278	-93.13892222	MAH00020	2	F	Species: Dalea purpurea	native_prairie	2017	7	17	11	0.453472222	-56.5	1.447916667
Carleton	488948.76	4923159.06	44.46165278	-93.13892222	MAH00020	2	G	Genus: Potentilla	unknown	2017	7	17	11	6.861111111	-148.75	1.28125
Carleton	488948.76	4923159.06	44.46165278	-93.13892222	MAH00021	3	A	Species: Securigera varia	non_native	2017	7	17	11	22.64861111	136	0.4375
Carleton	488948.76	4923159.06	44.46165278	-93.13892222	MAH00021	3	B	Species: Lotus corniculatus	non_native	2017	7	17	11	25.89375	38.5	1.635416667
Carleton	488948.76	4923159.06	44.46165278	-93.13892222	MAH00021	3	C	Species: Lotus corniculatus	non_native	2017	7	17	11	52.11805556	41.75	1.447916667
Carleton	488948.76	4923159.06	44.46165278	-93.13892222	MAH00021	3	D	Species: Securigera varia	non_native	2017	7	17	11	54.25833333	68.75	0.833333333
Carleton	488948.76	4923159.06	44.46165278	-93.13892222	MAH00021	3	E	Species: Lotus corniculatus	non_native	2017	7	17	12	2.23125	30.25	1.385416667
Carleton	488948.76	4923159.06	44.46165278	-93.13892222	MAH00047A	1	A	Species: Lotus corniculatus	non_native	2017	7	24	15	11.34791667	144.3333333	0.416666667
Carleton	488948.76	4923159.06	44.46165278	-93.13892222	MAH00047A	1	B	Species: Lotus corniculatus	non_native	2017	7	24	15	19.14930556	144	0.402777778
Carleton	488948.76	4923159.06	44.46165278	-93.13892222	MAH00045A	2	A	Species: Lotus corniculatus	non_native	2017	7	24	13	26.78125	-52	1.302083333
Carleton	488948.76	4923159.06	44.46165278	-93.13892222	MAH00045A	2	B	Species group: Trifolium repens/hybridum	non_native	2017	7	24	13	34.99236111	-70.25	1.0625
Carleton	488948.76	4923159.06	44.46165278	-93.13892222	MAH00045A	2	C	Species group: Trifolium repens/hybridum	non_native	2017	7	24	13	42.71875	141.75	0.40625
Carleton	488948.76	4923159.06	44.46165278	-93.13892222	MAH00045A	2	D	Genus: Brassica	non_native	2017	7	24	13	52.24166667	119	0.895833333
Carleton	488948.76	4923159.06	44.46165278	-93.13892222	MAH00045A	2	E	Species group: Trifolium repens/hybridum	non_native	2017	7	24	13	57.16388889	142.5	0.46875
Carleton	488948.76	4923159.06	44.46165278	-93.13892222	MAH00046A	3	A	Species: Lotus corniculatus	non_native	2017	7	24	14	10.66180556	-64.5	1.1875
Carleton	488948.76	4923159.06	44.46165278	-93.13892222	MAH00046A	3	B	Species group: Trifolium repens/hybridum	non_native	2017	7	24	14	13.97152778	136.5	0.552083333
Carleton	488948.76	4923159.06	44.46165278	-93.13892222	MAH00046A	3	C	Species group: Trifolium repens/hybridum	non_native	2017	7	24	14	18.41388889	-112.5	1.479166667
Carleton	488948.76	4923159.06	44.46165278	-93.13892222	MAH00046A	3	D	Species: Arctium minus	non_native	2017	7	24	14	21.01875	34	0.9375
Carleton	488948.76	4923159.06	44.46165278	-93.13892222	MAH00046A	3	E	Species: Lotus corniculatus	non_native	2017	7	24	14	52.08125	-65	1.447916667
Carleton	488948.76	4923159.06	44.46165278	-93.13892222	MAH00053	2	A	unknown	unknown	2017	8	5	10	3.353472222	62.5	1.989583333
Carleton	488948.76	4923159.06	44.46165278	-93.13892222	MAH00055	3	A	Family: Scrophulariaceae	unknown	2017	8	5	11	29.00069444	66.75	0.28125
Carleton	488948.76	4923159.06	44.46165278	-93.13892222	MAH00055	3	B	Species group: Trifolium repens/hybridum	non_native	2017	8	5	11	30.33541667	-134.25	0.739583333
Carleton	488948.76	4923159.06	44.46165278	-93.13892222	MAH00055	3	C	Genus: Solidago	native_prairie	2017	8	5	11	29.99861111	-74.75	0.520833333
Carleton	488948.76	4923159.06	44.46165278	-93.13892222	MAH00055	3	D	unknown	unknown	2017	8	5	11	48.00486111	28.5	1.041666667
Carleton	488948.76	4923159.06	44.46165278	-93.13892222	MAH00055	3	E	Species: Dalea purpurea	native_prairie	2017	8	5	11	49.36597222	-136.75	1.302083333
Carleton	488948.76	4923159.06	44.46165278	-93.13892222	MAH00055	3	F	Species: Lotus corniculatus	non_native	2017	8	5	12	4.163194444	145.75	0.614583333
Carleton	488948.76	4923159.06	44.46165278	-93.13892222	MAH00055	3	G	Species: Lotus corniculatus	non_native	2017	8	5	12	12.06666667	19.5	2.03125
Carleton	488948.76	4923159.06	44.46165278	-93.13892222	MAH00059	1	A	Species group: Trifolium repens/hybridum	non_native	2017	8	11	13	23.82083333	171.5	0.604166667
Carleton	488948.76	4923159.06	44.46165278	-93.13892222	MAH00059	1	B	Species group: Trifolium repens/hybridum	non_native	2017	8	11	13	28.45277778	169	0.6875
Carleton	488948.76	4923159.06	44.46165278	-93.13892222	MAH00059	1	C	Species: Arctium minus	non_native	2017	8	11	13	29.875	124.25	0.5625
Carleton	488948.76	4923159.06	44.46165278	-93.13892222	MAH00059	1	D	Family: Araliaceae	unknown	2017	8	11	13	31.06805556	97	1.6875
Carleton	488948.76	4923159.06	44.46165278	-93.13892222	MAH00059	1	E	Genus: Hydrangea	unknown	2017	8	11	13	31.92916667	-36	1.4375
Carleton	488948.76	4923159.06	44.46165278	-93.13892222	MAH00059	1	F	Genus: Agastache	native_prairie	2017	8	11	13	36.53611111	61.75	1.145833333
Carleton	488948.76	4923159.06	44.46165278	-93.13892222	MAH00061	2	A	Species: Lotus corniculatus	non_native	2017	8	11	15	27.86666667	-79	2.0625
Carleton	488948.76	4923159.06	44.46165278	-93.13892222	MAH00061	2	B	Species: Lotus corniculatus	non_native	2017	8	11	15	56.57013889	24.5	0.645833333
Carleton	488948.76	4923159.06	44.46165278	-93.13892222	MAH00060	3	A	Genus: Trifolium?	non_native	2017	8	11	14	23.15625	-61.5	1.364583333
Carleton	488948.76	4923159.06	44.46165278	-93.13892222	MAH00060	3	B	Species: Securigera varia	non_native	2017	8	11	14	43.24861111	93.25	2.1875
Carleton	488948.76	4923159.06	44.46165278	-93.13892222	MAH00065	1	A	unknown	unknown	2017	8	20	9	33.48819444	62.75	1.208333333
Carleton	488948.76	4923159.06	44.46165278	-93.13892222	MAH00065	1	B	Genus: Ambrosia	native_prairie	2017	8	20	9	40.55416667	-71.5	0.604166667
Carleton	488948.76	4923159.06	44.46165278	-93.13892222	MAH00065	1	C	Genus: Hydrangea	unknown	2017	8	20	9	41.86111111	43.5	1.489583333
Carleton	488948.76	4923159.06	44.46165278	-93.13892222	MAH00065	1	D	Genus: Taraxacum	non_native	2017	8	20	9	44.03611111	161	0.8125
Carleton	488948.76	4923159.06	44.46165278	-93.13892222	MAH00065	1	E	Genus: Taraxacum	non_native	2017	8	20	9	49.44097222	-123.75	0.90625
Carleton	488948.76	4923159.06	44.46165278	-93.13892222	MAH00065	1	F	Genus: Carduus	non_native	2017	8	20	9	53.67083333	-86.75	1.197916667
Carleton	488948.76	4923159.06	44.46165278	-93.13892222	MAH00065	1	G	unknown	unknown	2017	8	20	9	55.61388889	4.125	0.635416667
Carleton	488948.76	4923159.06	44.46165278	-93.13892222	MAH00065	1	H	Family: Asteraceae, type 1	unknown	2017	8	20	10	11.66944444	-98	0.75
Carleton	488948.76	4923159.06	44.46165278	-93.13892222	MAH00066	2	A	Family: Asteraceae, type 2	unknown	2017	8	20	10	35.94791667	-92.5	0.729166667
Carleton	488948.76	4923159.06	44.46165278	-93.13892222	MAH00066	2	B	Genus: Solidago	native_prairie	2017	8	20	10	43.47847222	138.5	0.71875
Carleton	488948.76	4923159.06	44.46165278	-93.13892222	MAH00067	3	A	Genus: Impatiens	native_non_prairie	2017	8	20	11	34.90555556	89.75	1.21875
Carleton	488948.76	4923159.06	44.46165278	-93.13892222	MAH00067	3	B	Genus: Solidago	native_prairie	2017	8	20	11	42.87361111	145.5	1.125
Carleton	488948.76	4923159.06	44.46165278	-93.13892222	00003.M4V	1	A	Genus: Solidago	native_prairie	2017	8	28	14	21.39097222	95.75	0.947916667
Carleton	488948.76	4923159.06	44.46165278	-93.13892222	00006.m4v	3	A	Genus: Solidago	native_prairie	2017	8	28	15	17.8125	48	0.5625
Carleton	488948.76	4923159.06	44.46165278	-93.13892222	00007.m4v	3	B	Genus: Impatiens	native_non_prairie	2017	8	28	15	25.85555556	-31.75	1.197916667
Carleton	488948.76	4923159.06	44.46165278	-93.13892222	00007.m4v	3	C	Species: Chamaecrista fasciculata	native_prairie	2017	8	28	15	28.47152778	148.375	0.78125
Carleton	488948.76	4923159.06	44.46165278	-93.13892222	00007.m4v	3	D	Species group: Trifolium repens/hybridum	non_native	2017	8	28	15	30.06458333	133.875	1.083333333
Carleton	488948.76	4923159.06	44.46165278	-93.13892222	00008.m4v	3	E	Species: Melilotus officinalis	non_native	2017	8	28	15	38.3625	100	0.979166667
Carleton	488948.76	4923159.06	44.46165278	-93.13892222	MAH00075	1	A	Genus: Hydrangea	unknown	2017	9	4	10	48.72430556	29.75	1.770833333
Carleton	488948.76	4923159.06	44.46165278	-93.13892222	MAH00075	1	B	Genus: Carduus	non_native	2017	9	4	10	53.75625	-121	1.208333333
Carleton	488948.76	4923159.06	44.46165278	-93.13892222	MAH00075	1	C	Genus: Impatiens	native_non_prairie	2017	9	4	10	56.58611111	152	1.0625
Carleton	488948.76	4923159.06	44.46165278	-93.13892222	MAH00075	1	D	Tribe: Heliantheae	native_prairie	2017	9	4	11	9.313194444	123	1.15625
Carleton	488948.76	4923159.06	44.46165278	-93.13892222	MAH00075	1	E	Genus: Impatiens	native_non_prairie	2017	9	4	11	29.03472222	48.75	0.822916667
Carleton	488948.76	4923159.06	44.46165278	-93.13892222	MAH00076	2	A	Species group: Trifolium repens/hybridum	non_native	2017	9	4	11	48.21388889	78	0.375
Carleton	488948.76	4923159.06	44.46165278	-93.13892222	MAH00074	3	A	Genus: Impatiens	native_non_prairie	2017	9	4	9	43.4	148	1.479166667
Carleton	488948.76	4923159.06	44.46165278	-93.13892222	MAH00074	3	B	unknown	unknown	2017	9	4	9	47.53819444	-78.25	2.427083333
Carleton	488948.76	4923159.06	44.46165278	-93.13892222	MAH00074	3	C	Genus: Impatiens	native_non_prairie	2017	9	4	10	31.66736111	120	0.958333333
