# Supplementary material for: Do honey bee (Apis mellifera) foragers recruit their nestmates to native forbs in reconstructed prairie habitats?
Source: PLoS One. 2020 Feb 12;15(2):e0228169. doi: 10.1371/journal.pone.0228169 (PMC7015315; doi:10.1371/journal.pone.0228169)
Supplement: S6 Data — (CSV) [file pone.0228169.s006.csv]

Site	Day	Month	Year	Quadrats surveyed	Achillea millefolium	Agastache foeniculum	Apocynum cannibinum	Asclepias syriaca	Asclepias tuberosa	Asclepias verticillata	Barbarea vulgaris	Berteroa incana	Carduus nutans	Cirsium arvense	Dalea candida	Dalea purpurea	Daucus carota	Desmodium canadense	Digitalis lantana	Erigeron annuus	Erigeron sp.	Erigeron strigosus	Heliopsis helianthoides	Hypericum perforatum	Leucanthemum vulgare	Linaria vulgaris	Lotus corniculatus	Medicago lupulina	Melilotus officinalis	Monarda fistulosa	Oxalis stricta	Penstemon digitalis	Potentilla norvegica	Potentilla sp.	Ratibida pinnata	Rosa arkansana	Rudbeckia hirta	Silene latifolia	Silene vulgaris	Solidago canadensis	Solidago rigida	Stellaria media	Taraxacum officinale	Tradescantia occidentalis	Trifolium campestre	Trifolium pratense	Trifolium repens	Verbascum thapsus	Verbena hastata
Belwin Conservancy	2	6	2015	10
Belwin Conservancy	23	6	2015	30	0.2		0.033333333												0.1		0.333333333			0.166666667	0.233333333		0.166666667					0.033333333					0.066666667		0.033333333							0.1	0.066666667
Belwin Conservancy	24	6	2015	10	0.2																0.1								0.2			0.2	0.1				0.1								0.4	0.3	0.2
Belwin Conservancy	30	6	2015	20		0.05	0.05	0.05					0.05	0.05	0.05			0.05			0.05		0.05											0.2					0.2							0.05
Belwin Conservancy	2	7	2015	10															0.3		0.9			0.4	0.9							0.1					0.1									0.8	0.1
Belwin Conservancy	7	7	2015	20	0.25		0.05	0.1													0.2		0.05				0.05		0.05			0.05					0.3		0.05							0.05
Belwin Conservancy	9	7	2015	10	0.1	0.1																							0.1			0.1					0.4								0.1		0.1
Belwin Conservancy	13	7	2015	20	0.05		0.05	0.15					0.05	0.05				0.1	0.05		0.45		0.2	0.15	0.45												0.15									0.25	0.15
Belwin Conservancy	21	7	2015	10																	0.1		0.3		0.1				0.1	0.3							0.1										0.1
Belwin Conservancy	23	7	2015	20	0.05																												0.1	0.1	0.05		0.2
Belwin Conservancy	27	7	2015	20	0.1			0.05		0.05								0.1			0.3			0.1	0.25					0.4					0.05		0.2		0.05
Belwin Conservancy	4	8	2015	20								0.05									0.05			0.05										0.05			0.1												0.05
Belwin Conservancy	5	8	2015	10																			0.1					0.1		0.6					0.2		0.2									0.1
Belwin Conservancy	12	8	2015	20								0.05									0.3			0.05	0.05					0.2							0.15			0.1						0.2
Belwin Conservancy	23	8	2015	20																	0.05			0.05		0.05	0.2																						0.05
Belwin Conservancy	26	8	2015	30		0.066666667															0.066666667				0.033333333			0.066666667	0.133333333	0.033333333										0.1	0.033333333								0.033333333
Belwin Conservancy	31	8	2015	30								0.033333333					0.033333333		0.033333333			0.033333333					0.066666667	0.066666667	0.033333333												0.033333333						0.066666667
Belwin Conservancy	16	5	2016	30							0.033333333																																0.066666667
Belwin Conservancy	6	6	2016	30	0.033333333																										0.166666667							0.2				0.066666667				0.033333333
Belwin Conservancy	7	6	2016	20	0.05																						0.05																		0.25	0.05	0.05
Belwin Conservancy	14	6	2016	30	0.033333333						0.033333333								0.033333333		0.066666667					0.033333333					0.3	0.066666667						0.1				0.033333333				0.2
Belwin Conservancy	20	6	2016	10	0.2																						0.5					0.1
Belwin Conservancy	27	6	2016	40	0.175	0.025			0.025			0.025	0.1	0.1					0.075	0.05		0.025	0.05	0.05		0.025		0.025			0.05	0.075			0.075			0.1				0.025				0.175	0.025	0.05
Carleton College	8	6	2017	40																									0.025		0.025					0.025								0.025		0.15
Carleton College	12	6	2017	40	0.05															0.025																0.025								0.025		0.125
Carleton College	20	6	2017	40	0.025															0.175																	0.2							0.025		0.1
Carleton College	27	6	2017	40	0.025				0.025											0.15																	0.3							0.025		0.2
Carleton College	14	7	2017	40	0.05											0.075				0.075									0.025	0.05							0.25
Carleton College	20	7	2017	40												0.075				0.175									0.025	0.1							0.275							0.025
Carleton College	4	8	2017	40												0.025				0.175										0.05							0.175
Carleton College	12	8	2017	40																										0.025										0.35
Carleton College	15	8	2017	40																										0.025										0.525
Carleton College	23	8	2017	40																																				0.725
Carleton College	29	8	2017	40																																				0.55
[truncated: 4 more columns]
